# Supplementary material for: Efficacy of an Anthocyanin and Prebiotic Blend on Intestinal Environment in Obese Male and Female Subjects
Source: J Nutr Metab. 2018 Sep 13;2018:7497260. doi: 10.1155/2018/7497260 (PMC6158948; doi:10.1155/2018/7497260)
Supplement: Supplementary Materials — The study data file in supplementary materials contains complete subject's demographics, vital signs, product compliance, labs, bowel diary records, abdominal discomfort questionnaire, 3-day food record, and all adverse events. [file 7497260.f1.zip]

Archive with 4 entries (4 files):
- Supplemental Document 1. Bowel movement diary.docx
- Supplemental Document 2. Abdominal discomfort questionnaire.docx
- Supplemental Document 3. Bristol Stool Chart.docx
- Study Data.xlsx
