# Supplementary material for: Efficacy of an Anthocyanin and Prebiotic Blend on Intestinal Environment in Obese Male and Female Subjects
Source: J Nutr Metab. 2018 Sep 13;2018:7497260. doi: 10.1155/2018/7497260 (PMC6158948; doi:10.1155/2018/7497260)
Supplement: Supplementary Materials — The study data file in supplementary materials contains complete subject's demographics, vital signs, product compliance, labs, bowel diary records, abdominal discomfort questionnaire, 3-day food record, and all adverse events. [file 7497260.f1.zip › Study Data.xlsx]

## Sheet: DEMOGRAPHICS
		Demographics information for completed subjects	Demographics information for completed subjects	Demographics information for completed subjects	Demographics information for completed subjects	Demographics information for completed subjects	Demographics information for completed subjects
		Demographics Race	Demographics BirthDate	Demographics Ethnicity	Demographics Gender	Demographics Subject Number	Age at Baseline
	001	White	1963-11-29	Non-Hispanic/Latino	Female	001	1952-05-09 07:15:00
	002	White	1959-08-14	Non-Hispanic/Latino	Female	002	1956-08-24 07:40:00
	003	White	1963-12-02	Non-Hispanic/Latino	Female	003	1952-05-07 08:15:00
	004	White	1970-06-05	Non-Hispanic/Latino	Female	004	1945-11-01 08:35:00
	005	White	1989-02-10	Hispanic/Latino	Male	005	1927-02-25 08:20:00
	006	White	1975-03-29	Non-Hispanic/Latino	Female	006	1941-01-21 07:31:00
	007	White	1984-12-09	Non-Hispanic/Latino	Female	007	1931-04-29 10:22:00
	008	White	1994-01-08	Non-Hispanic/Latino	Female	008	1922-04-01 11:37:00
	012	White	1967-08-31	Non-Hispanic/Latino	Female	012	1948-08-07 08:45:00
	014	White	1957-10-13	Non-Hispanic/Latino	Female	014	1958-06-27 08:48:00
	015	White	1970-06-23	Non-Hispanic/Latino	Female	015	1945-10-17 07:18:00
	017	White	1993-07-08	Non-Hispanic/Latino	Female	017	1922-09-30 11:35:00
	018	White	1988-05-14	Non-Hispanic/Latino	Male	018	1927-11-25 08:05:00
	019	White	1958-09-20	Non-Hispanic/Latino	Male	019	1957-07-25 07:20:00
	020	White	1982-03-25	Non-Hispanic/Latino	Female	020	1934-01-15 07:55:00
	021	White	1971-09-14	Non-Hispanic/Latino	Female	021	1944-07-25 08:45:00
	022	White	1965-03-21	Non-Hispanic/Latino	Female	022	1951-01-19 07:50:00
	023	White	1971-03-04	Non-Hispanic/Latino	Female	023	1945-02-05 08:10:00
	024	White	1972-02-02	Non-Hispanic/Latino	Female	024	1944-03-12 10:15:00
	025	White	1986-07-19	Non-Hispanic/Latino	Female	025	1929-09-19 09:40:00
	026	White	1963-05-31	Non-Hispanic/Latino	Female	026	1952-11-09 07:46:00
	028	White	1968-03-10	Non-Hispanic/Latino	Male	028	1948-01-30 07:30:00
	029	White	1969-01-12	Non-Hispanic/Latino	Female	029	1947-03-31 08:00:00
	031	White	1971-11-16	Non-Hispanic/Latino	Female	031	1944-05-24 07:05:00
	033	White	1982-02-26	Non-Hispanic/Latino	Male	033	1934-02-18 12:15:00
	034	White	1984-10-11	Non-Hispanic/Latino	Female	034	1931-06-29 08:40:00
	035	White	1968-09-03	Non-Hispanic/Latino	Male	035	1947-08-06 07:10:00
	037	White	1961-11-12	Non-Hispanic/Latino	Male	037	1954-05-28 08:55:00
	038	Black/African American	1965-06-12	Non-Hispanic/Latino	Female	038	1950-10-28 07:46:00
	039	White	1967-05-20	Non-Hispanic/Latino	Male	039	1948-11-27 14:45:00
	040	Black/African American	1963-10-11	Non-Hispanic/Latino	Female	040	1952-06-29 07:55:00
	041	White	1982-04-07	Non-Hispanic/Latino	Female	041	1934-01-02 09:06:00
	042	White	1986-09-20	Non-Hispanic/Latino	Male	042	1929-07-20 07:20:00
	044	White	1962-08-11	Non-Hispanic/Latino	Male	044	1953-09-05 12:05:00
	047	White	1970-08-14	Non-Hispanic/Latino	Female	047	1945-08-29 10:50:00
	048	White	1980-12-18	Non-Hispanic/Latino	Female	048	1935-04-25 10:10:00
	050	White	1982-03-15	Non-Hispanic/Latino	Female	050	1934-02-01 11:25:00
	052	White	1956-01-15	Non-Hispanic/Latino	Female	052	1960-03-27 07:35:00
	053	Black/African American	1969-08-23	Non-Hispanic/Latino	Female	053	1946-08-22 09:25:00
	057	White	1961-08-02	Non-Hispanic/Latino	Male	057	1954-09-14 12:30:00
	058	White	1968-01-15	Non-Hispanic/Latino	Female	058	1948-04-05 07:15:00
	059	White	1970-11-11	Non-Hispanic/Latino	Female	059	1945-06-05 08:25:00
	062	White	1971-06-14	Non-Hispanic/Latino	Female	062	1944-11-02 07:10:00
	071	White	1979-01-11	Non-Hispanic/Latino	Male	071	1937-04-05 07:30:00
	072	White	1975-12-14	Non-Hispanic/Latino	Female	072	1940-05-03 07:45:00
	077	White	1984-06-05	Non-Hispanic/Latino	Female	077	1931-11-11 14:25:00

## Sheet: VITAL SIGNS
		VS data for completed subjects	VS data for completed subjects	VS data for completed subjects	VS data for completed subjects	VS data for completed subjects	VS data for completed subjects	VS data for completed subjects	VS data for completed subjects	VS data for completed subjects	VS data for completed subjects	VS data for completed subjects	VS data for completed subjects	VS data for completed subjects	VS data for completed subjects	VS data for completed subjects	VS data for completed subjects	VS data for completed subjects	VS data for completed subjects	VS data for completed subjects	VS data for completed subjects	VS data for completed subjects	VS data for completed subjects	VS data for completed subjects	VS data for completed subjects
		Vital Signs Systotic (mm Hg)	Vital Signs Systotic (mm Hg)	Vital Signs Systotic (mm Hg)	Vital Signs Systotic (mm Hg)	Vital Signs Diastolic (mm Hg)	Vital Signs Diastolic (mm Hg)	Vital Signs Diastolic (mm Hg)	Vital Signs Diastolic (mm Hg)	Vital Signs Pulse (bpm)	Vital Signs Pulse (bpm)	Vital Signs Pulse (bpm)	Vital Signs Pulse (bpm)	Vital Signs Height (cm)	Vital Signs Height (cm)	Vital Signs Height (cm)	Vital Signs Height (cm)	Vital Signs Weight (kg)	Vital Signs Weight (kg)	Vital Signs Weight (kg)	Vital Signs Weight (kg)	Vital Signs BMI	Vital Signs BMI	Vital Signs BMI	Vital Signs BMI
		Visit 1	Visit 2	Visit 3	Visit 4	Visit 1	Visit 2	Visit 3	Visit 4	Visit 1	Visit 2	Visit 3	Visit 4	Visit 1	Visit 2	Visit 3	Visit 4	Visit 1	Visit 2	Visit 3	Visit 4	Visit 1	Visit 2	Visit 3	Visit 4
	001	112	110	131.333	109	71.6667	77.6667	70.6667	71.3333	66	81	88	65	161.3				98.6	97.7	98.5	97.8	37.8973	37.5514	37.8589	37.5898
	002	125.333	116	151	127	80	81	82	74.6667	57	61	58	56	160.5				80	79.2	81.9	82.4	31.0556	30.745	31.7932	31.9873
	003	128.333	132	130.333	130.667	88.3333	91	72.3333	81.6667	60	70	71	69	159.8				103.7	104.3	103.4	104.7	40.6093	40.8442	40.4918	41.0009
	004	117.333	126.333	108	108	72.3333	80.3333	67.6667	75.3333	71	71	76	74	155.4				90.7	91.8	89.5	91.5	37.5582	38.0137	37.0613	37.8895
	005	115.667	124.667	103.333	112.333	61.3333	78.3333	70	63.6667	62	64	75	64	177.5				107.3	106.2	107	108	34.0567	33.7076	33.9615	34.2789
	006	131	136.667	135.333	128.667	88	87.6667	85	82.6667	75	80	75	84	176.5				104	104.6	103.7	102	33.3844	33.577	33.2881	32.7424
	007	110.333	104	122.333	109.667	72	74.6667	78.3333	66	60	57	63	63	156.6				81.8	82.5	82.6	82.5	33.3557	33.6411	33.6819	33.6411
	008	103.667	121.667	121.667	120	71.6667	76.3333	70.3333	75.6667	78	91	72	97	175.7				125	125.3	125.8	124	40.4917	40.5889	40.7509	40.1678
	012	123.667	119.333	124.667	134.333	72	83.3333	70	80	67	68	73	73	176.4				117.2	115.2	116.1	114.6	37.6643	37.0216	37.3108	36.8288
	014	140.667	135.333	133	124	85.3333	90	79	92.3333	65	79	80	88	159.2				99	99	98.5	97.5	39.0615	39.0615	38.8642	38.4697
	015	113.333	104	117.667	119	71.6667	77	77.3333	75	80	91	95	81	162.5				94.3	92.2	92.4	92.5	35.7112	34.916	34.9917	35.0296
	017	129.333	121.667	122.667	124.333	74.6667	65.6667	65	69	87	84	72	78	164				102.5	98.5	100.5	102	38.1098	36.6225	37.3662	37.9239
	018	134.667	140	128.667	141	83	84.3333	74.6667	77.6667	92	85	76	70	178.5				112.4	113.2	113.4	114.2	35.2769	35.5279	35.5907	35.8418
	019	127.667	136	122.667	127.333	81.3333	89.6667	79.3333	79	109	78	84	85	170.5				95	94.9	95.6	95.6	32.6795	32.6451	32.8859	32.8859
	020	96	96.3333	101	101.333	61	69.6667	68.6667	65.6667	83	79	76	80	164				80.4	80.9	80.7	80.5	29.8929	30.0788	30.0045	29.9301
	021	92.3333	96.3333	98	98.6667	63.3333	69	71.3333	60.3333	56	55	63	67	155				78.2	77.6	79.5	81.6	32.5494	32.2997	33.0905	33.9646
	022	116.667	120	106.333	127.333	76	81.6667	67	80.6667	87	76	72	66	169.5				97.7	95.4	97.7	96	34.006	33.2054	34.006	33.4143
	023	129.667	127.333	127	125	95.3333	90	90.6667	83.3333	88	87	72	61	165.8				86.9	86.9	86.2	87.8	31.6119	31.6119	31.3573	31.9393
	024	115.333	113.333	112.333	116	66.3333	89	65.3333	70.3333	79	65	72	70	158.5				74.5	74.8	75.3	75.7	29.655	29.7744	29.9734	30.1327
	025	115	111.333	112.667	116	78.6667	81	79	72.3333	83	85	95	75	164				78.5	77.3	77.2	77.2	29.1865	28.7403	28.7032	28.7032
	026	114.667	124.667	120	111	85	75.3333	92	84.6667	75	66	75	86	160				97.4	92.4	97	97.8	38.0469	36.0938	37.8906	38.2031
	028	136.667	132.333	131.667	137	86.6667	80.6667	86	92.3333	81	64	98	72	184.7				128.8	128.8	128.3	127.4	37.7557	37.7557	37.6091	37.3453
	029	137	131.667	127.333	130.333	91.3333	95.6667	80	80.6667	66	62	67	59	167.8				99.1	99	98.3	96.7	35.1957	35.1602	34.9116	34.3433
	031	102	111	112	115	63.6667	63	72.6667	72.3333	68	74	71	61	160				86.3	86	88.2	85.7	33.7109	33.5938	34.4531	33.4766
	033	123.333	138	139.333	131	72.3333	89.3333	83.3333	82.3333	55	57	52	56	189				112.3	112.4	111.7	109.5	31.4381	31.4661	31.2701	30.6542
	034	105	112.667	113.667	119.667	60.6667	74.6667	68	71.6667	68	76	72	71	174				91.7	92.6	90.4	87.4	30.288	30.5853	29.8586	28.8678
	035	132.667	114	135.333	115	80.6667	77.6667	80	61.6667	77	56	62	62	176.5				109.9	109.2	110.4	109.5	35.2784	35.0536	35.4389	35.1499
	037	130.667	136	129	129	86	99	94.6667	86.6667	82	87	79	86	173.5				102.7	100.9	101.7	104	34.1171	33.5191	33.7848	34.5489
	038	124.667	124.667	122	133	72.3333	75.3333	71.3333	73.6667	74	66	71	64	164.7				93.7	92.4	92	94.2	34.5424	34.0631	33.9157	34.7267
	039	114.333	123	122.333	107.333	75.3333	84.3333	82	70.3333	57	68	60	60	173.2				93.2	93	93.5	92	31.0685	31.0018	31.1685	30.6685
	040	119.667	121.333	132.667	121	81.3333	81.3333	86.3333	72.6667	61	76	67	74	171				90.7	90.7	93	93	31.0181	31.0181	31.8047	31.8047
	041	119.667	110.667	113	117.667	80.3333	80.6667	76.6667	87.6667	80	76	79	81	164				81	81	82.7	82.2	30.116	30.116	30.7481	30.5622
	042	118.667	122.667	128	132.667	74	80.6667	84	80.6667	66	77	71	70	182.3				107.6	107.6	107.3	108.5	32.3772	32.3772	32.2869	32.648
	044	146	143	142.667	136.667	87.3333	101.667	102	96.3333	80	74	75	73	175.3				97	97.6	96.9	98	31.5652	31.7604	31.5326	31.8906
	047	111	108.667	110.667	114	64	70	69.6667	69	69	67	62	67	153				91.9	90.3	91	90.8	39.2584	38.5749	38.8739	38.7885
	048	99	95.6667	92.3333	99.3333	57	64.6667	56	61	87	72	84	79	165				92.2	94.7	94.8	94	33.8659	34.7842	34.8209	34.5271
	050	117	122.667	126	114.333	78	79.6667	84	80.3333	76	73	78	70	169				93.6	93.7	92.9	89.7	32.772	32.807	32.5269	31.4065
	052	127.667	119.667	113.667	136	74.6667	72.6667	76	85	79	72	68	68	156.1				95.5	96	96.8	97	39.192	39.3972	39.7255	39.8076
	053	112.333	110	124.667	132.667	73.6667	69.3333	83.3333	87	62	66	77	84	157.8				84	83.7	82.8	83	33.7338	33.6133	33.2519	33.3322
	057	123.667	131.333	120	113.333	71.3333	78	81	75.6667	58	57	63	60	172				109.6	110	108	107	37.0471	37.1823	36.5062	36.1682
	058	127.667	124	126.667	124.333	92	83.3333	82	86.3333	99	84	80	81	156				82	80.7	81.5	81.4	33.6949	33.1607	33.4895	33.4484
	059	123	110	133.667	120.333	91.3333	75.6667	84.3333	80.6667	67	64	72	64	172.6				106.5	107	108.4	106.5	35.7493	35.9172	36.3871	35.7493
	062	119.333	124	107	114	68.6667	82	67	75	76	73	82	71	149				71.6	71.4	71.7	71	32.2508	32.1607	32.2958	31.9805
	071	117.667	118.333	120.333	128.667	63.6667	72.3333	73.6667	73.3333	60	46	65	49	180.5				97.6	94	93	93.9	29.9568	28.8518	28.5449	28.8211
	072	116.667	109.333	123	118.333	69	66.6667	80	76.3333	68	68	59	70	164				85.4	85	85.4	85.7	31.7519	31.6032	31.7519	31.8635
	077	114.333	97	103.333	100.667	76	63	70.6667	70.3333	80	90	100	91	152				72.7	72.5	71.6	71.8	31.4664	31.3798	30.9903	31.0769

## Sheet: PRODUCT COMPLIANCE
		Product compliance for completed subjects	Product compliance for completed subjects	Product compliance for completed subjects	Product compliance for completed subjects
		Visit 1	Visit 2	Visit 3	Visit 4
	001			1	1
	002			0.965517	0.965517
	003			0.967742	0.983871
	004			1.07143	1.03571
	005			0.9375	1.05804
	006			1.03448	0.965517
	007			1	0.951613
	008			1	1.03571
	012			1	0.946429
	014			1	1.01515
	015			1	1.04545
	017			0.966667	1.00119
	018			1	1.03571
	019			1	0.967742
	020			0.935484	0.952117
	021			1	0.982143
	022			1	1
	023			1	0.984848
	024			1	0.98
	025			0.84375	0.881875
	026			0.866667	0.872727
	028			1	0.954545
	029			1	0.965517
	031			1	0.984848
	033			0.9	0.930769
	034			1	1
	035			0.966667	0.968182
	037			1	0.969697
	038			1	1.01923
	039			0.933333	0.951515
	040			1	0.980769
	041			1	1.04545
	042			1	0.984848
	044			0.966667	0.952083
	047			1	0.982143
	048			1	0.983333
	050			0.967742	1.04637
	052			0.933333	0.863218
	053			1.03448	0.952725
	057			1	0.984848
	058			1	0.982143
	059			0.935484	1.01613
	062			1	1.01667
	071			1	0.985714
	072			0.882353	0.768763
	077			0.9	0.967241

## Sheet: LABS
		Lab data for completed subjects	Lab data for completed subjects	Lab data for completed subjects	Lab data for completed subjects	Lab data for completed subjects	Lab data for completed subjects	Lab data for completed subjects	Lab data for completed subjects	Lab data for completed subjects	Lab data for completed subjects	Lab data for completed subjects	Lab data for completed subjects	Lab data for completed subjects	Lab data for completed subjects	Lab data for completed subjects	Lab data for completed subjects	Lab data for completed subjects	Lab data for completed subjects	Lab data for completed subjects	Lab data for completed subjects	Lab data for completed subjects	Lab data for completed subjects	Lab data for completed subjects	Lab data for completed subjects	Lab data for completed subjects	Lab data for completed subjects	Lab data for completed subjects	Lab data for completed subjects	Lab data for completed subjects	Lab data for completed subjects	Lab data for completed subjects	Lab data for completed subjects	Lab data for completed subjects	Lab data for completed subjects	Lab data for completed subjects	Lab data for completed subjects	Lab data for completed subjects	Lab data for completed subjects	Lab data for completed subjects	Lab data for completed subjects	Lab data for completed subjects	Lab data for completed subjects	Lab data for completed subjects	Lab data for completed subjects	Lab data for completed subjects	Lab data for completed subjects	Lab data for completed subjects	Lab data for completed subjects
		Chemistry	Chemistry	Chemistry	Chemistry	Chemistry	Chemistry	Chemistry	Chemistry	Chemistry	Chemistry	Chemistry	Chemistry	Chemistry	Chemistry	Chemistry	Chemistry	Chemistry	Chemistry	Hematology	Hematology	Hematology	Hematology	Hematology	Hematology	Hematology	Hematology	Hematology	Hematology	Hematology	Hematology	Hematology	Hematology	Hematology	Hematology	Hematology	Hematology	Hematology	Hematology	Hematology	Hematology	Hematology	Hematology	Hematology	Hematology	Hematology	Hematology	Lipids	Lipids
		ALT	ALT	AST	AST	Calcium	Calcium	Chloride	Chloride	Creatine	Creatine	HbA1c	HbA1c	Potassium	Potassium	Sodium	Sodium	Total Bilirubin	Total Bilirubin	Abolute Basophils	Abolute Basophils	Absolute Eosinophils	Absolute Eosinophils	Absolute Lymphocytes	Absolute Lymphocytes	Absolute Monocytes	Absolute Monocytes	Absolute Neutrophils	Absolute Neutrophils	Hematocrit	Hematocrit	Hemoglobin	Hemoglobin	MCH	MCH	MCHC	MCHC	MCV	MCV	Platelet Count	Platelet Count	RBC	RBC	RDW	RDW	WBC	WBC	Cholestrol	Cholestrol
		Visit 1	Visit 4	Visit 1	Visit 4	Visit 1	Visit 4	Visit 1	Visit 4	Visit 1	Visit 4	Visit 1	Visit 4	Visit 1	Visit 4	Visit 1	Visit 4	Visit 1	Visit 4	Visit 1	Visit 4	Visit 1	Visit 4	Visit 1	Visit 4	Visit 1	Visit 4	Visit 1	Visit 4	Visit 1	Visit 4	Visit 1	Visit 4	Visit 1	Visit 4	Visit 1	Visit 4	Visit 1	Visit 4	Visit 1	Visit 4	Visit 1	Visit 4	Visit 1	Visit 4	Visit 1	Visit 4	Visit 2	Visit 4
	001	25	26	20	23	2.37	2.34	107	109	73	70	5.3	5.1	4.6	4.4	139	142	6	6	0	0	0.1	0	2.7	1.8	0.5	0.3	3.7	2.6	0.4	0.42	133	141	29	29.2	330	333	88	88	162	139	4.58	4.83	14	13.3	7	4.8	5.99	5.29
	002	21	19	21	23	2.47	2.34	99	105	65	64	5.3	5.5	4.4	4.4	133	140	7	6	0.1	0.1	0.3	0.3	2.1	2	0.5	0.4	3.3	3.4	0.42	0.398	143	133	30.4	30.2	340	334	89	90	315	279	4.7	4.41	14.4	14.4	6.3	6.1	5.85	6.14
	003	30	36	25	26	2.44	2.36	108	107	67	57	5.4	5.1	4.2	3.9	140	142	14	12	0	0	0.1	0.1	1.6	1.7	0.5	0.4	3.2	3	0.4	0.397	139	135	29.9	28.7	348	340	86	85	186	196	4.65	4.7	14.1	13.5	5.6	5.2	5.05	5.51
	004	19	16	21	20	2.53	2.33	103	102	61	52	5.6	5.7	4.1	3.7	142	139	10	7	0	0	0.1	0.1	2.6	2.3	0.4	0.5	4.1	4.5	0.4	0.38	135	131	29.2	29.9	337	347	87	86	280	250	4.62	4.38	13.6	14.1	7.1	7.3	6.11	5.69
	005	28	41	23	35	2.39	2.33	106	108	87	85	5.2	5.2	4.3	4.2	140	140	7	14	0	0.1	0.3	0.4	2	3.5	0.4	0.5	4.9	4.5	0.44	0.44	154	149	32.2	30.7	353	339	91	91	213	247	4.78	4.86	13.3	13.5	7.7	9	4.61	4.35
	006	17	17	20	17	2.43	2.36	106	109	56	54	5.2	5.1	4.4	4.4	137	139	7	6	0	0	0.1	0.1	2.4	2.7	0.3	0.4	3.5	5.1	0.37	0.36	124	121	29.7	29.2	334	333	89	88	433	430	4.18	4.14	13.7	13.4	6.3	8.3	5.75	5.04
	007	87	79	44	43	2.48	2.3	103	107	57	55	5.6	5.9	4.5	4.4	137	139	9	11	0	0	0.2	0.1	3.5	2.5	0.7	0.5	5.8	5.6	0.44	0.4	148	137	28.3	28	340	339	83	82	340	314	5.23	4.9	13.6	13.9	10.2	8.8	4.73	4.48
	008	23	22	18	19	2.31	2.34	106	107	66	61	5	5.3	4.1	4.3	139	141	7	7	0	0	0.2	0.1	1.8	2.5	0.7	0.7	5.2	5.1	0.44	0.45	142	148	25.6	25.9	326	333	79	78	300	276	5.54	5.71	14	14.2	7.9	8.5	3.94	3.74
	012	15	15	18	17	2.41	2.38	107	107	65	59	5.5	5.3	3.9	4	144	142	7	9	0	0	0.1	0.1	1.8	1.7	0.3	0.3	3.3	2.7	0.35	0.37	118	124	27.8	27.8	333	334	83	83	233	210	4.25	4.46	14.3	14.7	5.5	4.8	6.95	6.96
	014	22	18	23	21	2.46	2.29	103	109	76	74	5.5	5.3	5	4.4	141	146	7	8	0	0	0.2	0.2	2.5	2.2	0.7	0.5	4	2.4	0.42	0.427	145	149	33.1	33.3	344	349	96	95	233	280	4.38	4.48	13.7	13.9	7.5	5.4	5.72	5.81
	015	24	21	22	20	2.43	2.32	109	108	73	64	5.5	5.2	5	4.8	144	141	5	8	0.1	0.1	0.2	0.2	2.9	1.8	0.9	0.6	7.3	4.5	0.39	0.388	132	128	30.3	29.6	337	330	90	90	176	279	4.35	4.32	12.8	13	11.4	7.1	4.43	4.36
	017	14	10	18	11	2.29	2.21	107	111	66	61	5.4	5.1	4.2	4.2	141	141	3	3	0	0	0.1	0.1	1.9	1.5	0.8	0.6	3.8	3.4	0.39	0.391	130	132	28.7	28.8	335	338	86	85	327	283	4.53	4.58	15.2	14.6	6.7	5.6	4.02	4.27
	018	46	46	26	23	2.44	2.37	106	105	76	70	5.4	5.1	4.2	4.2	143	140	22	20	0	0	0.1	0.1	2	3	0.7	0.6	4.3	3.7	0.46	0.457	158	155	30.1	29.2	342	339	88	86	247	276	5.25	5.3	13.5	13.1	7.2	7.5	5.1	4.92
	019	26	22	26	27	2.52	2.48	106	106	81	85	5.2	5.3	4.1	4	143	142	8	7	0	0.1	0.1	0.1	1.7	2	0.7	0.7	2.6	2.9	0.41	0.39	144	132	31	29.3	352	339	88	86	304	293	4.64	4.5	13.9	13.5	5.3	5.8	5.44	5.51
	020	31	29	27	19	2.45	2.36	108	107	64	57	5.5	5.2	5	4.5	140	141	9	10	0	0	0.1	0.1	2	1.9	0.4	0.6	3.3	6.5	0.38	0.396	131	133	29.8	29.3	343	336	87	87	342	304	4.39	4.54	13.6	13.1	5.7	9.2	5.1	5.24
	021	21	15	23	16	2.45	2.23	104	107	62	60	4.9	5.2	4.1	4.1	140	141	6	7	0.1	0	0.2	0.3	1.8	1.5	0.5	0.3	7.2	5	0.39	0.396	131	130	30.4	29.7	335	328	91	91	294	295	4.31	4.37	13.5	13.7	9.8	7.2	5.01	5.24
	022	30	25	27	20	2.38	2.37	105	103	58	60	5.3	5.1	4.6	4.2	140	139	16	18	0	0	0.2	0.1	2.8	2.5	0.7	1	4.5	4.7	0.37	0.413	129	137	30.6	29.5	348	332	88	89	249	279	4.21	4.64	13.7	13.8	8.2	8.3	3.82	4.09
	023	30	16	28	21	2.46	2.24	105	108	67	62	5.8	5.8	4.4	4.7	141	141	10	12	0	0	0.1	0.1	2.2	1.9	0.4	0.4	4	2.7	0.44	0.419	144	140	30.8	31.4	331	334	93	94	344	328	4.68	4.46	13.4	13.5	6.7	5.1	4.94	4.74
	024	69	18	52	22	2.52	2.3	102	111	65	62	5	4.8	4.4	4.6	139	141	10	5	0	0	0.1	0.1	1.7	1.2	0.6	0.4	5.2	3.1	0.42	0.42	143	142	29.3	29.7	345	337	85	88	366	375	4.88	4.78	13.5	13.4	7.6	4.8	6.31	5.76
	025	40	62	30	35	2.48	2.38	102	108	91	52	4.8	4.8	4.3	4.3	142	141	5	7	0.1	0	0.1	0.1	2.9	2.5	0.6	0.4	6	3	0.42	0.4	138	134	28.5	28.9	328	333	87	87	249	232	4.84	4.64	12.5	12.9	9.7	6	4.68	4.49
	026	20	22	23	22	2.59	2.32	105	108	77	63	5.8	5.8	4.7	4	144	140	5	6	0	0	0.3	0.2	3.3	2.5	0.8	0.8	3.2	2.9	0.39	0.387	129	128	30.1	30.3	330	331	91	92	349	322	4.28	4.22	13.2	14	7.6	6.4	4.89	6.06
	028	77	54	25	18	2.55	2.39	105	105	94	84	5.7	5.7	4.9	4.1	144	141	7	11	0	0	0.2	0.3	2.6	1.7	0.7	0.6	5.9	3.3	0.46	0.423	153	146	28.1	29.6	332	345	85	86	253	206	5.44	4.93	13.4	13.3	9.5	5.9	5.59	4.78
	029	18	15	20	19	2.48	2.23	106	108	69	76	5.5	5.5	4.5	4.4	146	143	4	8	0.1	0	0.2	0.2	3	1.6	0.8	0.5	5.4	3.2	0.39	0.4	124	129	27.8	28.1	321	324	87	87	404	361	4.46	4.59	15	14.6	9.5	5.5	5.17	5.02
	031	16	20	18	21	2.26	2.28	108	110	67	75	5.4	4.8	4.6	4.3	142	142	5	9	0	0.1	0.3	0.2	1.7	1.9	0.8	0.7	5.3	3.7	0.38	0.353	127	119	31	30.8	337	337	92	92	294	288	4.1	3.86	12.7	13	8.2	6.6	6.94	7.12
	033	37	32	37	36	2.46	2.44	103	106	84	85	4.8	4.5	4.6	4.6	141	142	12	16	0	0.1	0.2	0.4	1.7	1.7	0.4	0.3	2.5	2	0.48	0.478	170	162	31.4	29.9	358	339	88	88	145	159	5.41	5.42	13.7	13	4.8	4.5	4.38	4.29
	034	19	18	21	22	2.43	2.5	104	110	61	69	6.3	5.9	4.6	4.8	140	149	7	13	0	0	0.2	0.2	2.3	2.1	0.6	0.6	6	5.2	0.42	0.394	144	127	28.7	27.8	344	322	84	86	294	254	5.02	4.57	13.5	13.3	9	8	3.78	3.49
	035	55	38	28	20	2.4	2.36	106	106	79	69	5.8	5.7	5.2	4.5	140	139	4	9	0.1	0	0.3	0.2	1.8	1.3	0.7	0.4	3	2.9	0.47	0.456	165	152	30.1	29	349	333	86	87	229	245	5.49	5.25	13.5	13.5	5.9	4.9	3.93	3.75
	037	43	32	41	31	2.45	2.34	105	106	91	82	5.8	5.8	5.2	5.4	143	140	11	7	0	0	0.2	0.2	1.9	2.1	0.9	1	5.8	4.3	0.46	0.46	159	152	31.2	30.6	344	330	91	93	273	283	5.09	4.96	14.5	14.2	8.8	7.6	5.43	5.97
	038	24	24	22	21	2.54	2.51	103	103	82	84	6.6	6.5	3.9	3.6	145	141	12	16	0	0	0.1	0.1	1.8	1.4	0.2	0.2	1.4	1.1	0.35	0.371	124	121	26.4	24.8	353	326	75	76	259	280	4.69	4.87	16.9	16.8	3.5	2.8	4.89	4.28
	039	33	28	28	30	2.52	2.24	107	110	86	90	5.3	5.1	4.5	3.8	142	142	16	20	0	0	0.1	0.1	1.8	1.8	0.4	0.4	2.3	1.7	0.45	0.429	159	145	31.5	30.5	351	338	90	90	137	137	5.04	4.75	14.8	13.9	4.6	4.1	4.36	4.34
	040	19	15	21	16	2.01	2.41	107	107	49	75	5.7	5.3	4.5	4.8	145	143	12	13	0	0	0.1	0.1	2.2	1.7	0.3	0.4	2.3	1.5	0.39	0.402	129	129	29	28.1	331	321	88	88	272	270	4.45	4.59	14.6	13.7	4.9	3.6	4.01	3.51
	041	16	14	17	16	2.42	2.38	106	108	61	64	5.4	4.6	5	4.4	141	143	4	6	0	0.1	0.4	0.4	2.7	2.6	0.7	0.7	8.1	4.6	0.37	0.368	122	120	27.6	27.5	329	326	84	84	347	304	4.42	4.37	13.7	13.8	11.9	8.3	4.38	4.4
	042	39	51	34	37	2.51	2.52	103	105	68	69	5.4	5.5	5.3	5.2	141	142	14	14	0	0.1	0.1	0.2	1.9	2.3	0.4	0.4	3.6	3.2	0.47	0.449	166	157	32	31.7	355	350	90	91	306	333	5.18	4.96	13	12.9	6.2	6.2	3.93	4.84
	044	47	43	38	39	2.31	2.32	106	108	89	77	5.8	5.7	4.7	4.2	144	142	8	14	0	0	0.3	0.06	1.6	1.8	0.4	0.5	2.2	2.1	0.46	0.44	156	152	28.8	28.5	339	343	85	83	208	194	5.42	5.33	13.9	14	4.5	4.9	5.07	4.69
	047	23	20	23	23	2.43	2.32	102	109	68	74	5.7	6	4.4	4.3	141	143	4	10	0	0	0.1	0.1	1.8	1.1	0.5	0.5	4	2.6	0.41	0.43	134	139	29.5	29.4	324	326	91	90	310	292	4.55	4.73	13.6	13.6	6.3	4.3	5.84	6.19
	048	15	17	20	19	2.29	2.32	104	108	59	55	5	5.1	3.8	4.6	141	142	8	11	0	0	0.1	0.1	2.3	2.3	0.6	0.7	6.7	5.4	0.42	0.43	137	144	27.3	28.6	329	338	83	85	274	250	5.01	5.04	12.9	13.4	9.7	8.5	4.03	4.08
	050	18	19	22	21	2.45	2.36	105	107	67	61	5.3	4.9	4.7	4.5	139	140	4	6	0	0	0.2	0.2	3.9	2.6	0.7	0.5	4.8	3.9	0.37	0.386	123	128	29.4	30	330	332	89	91	432	372	4.19	4.26	13.2	13.2	9.6	7.3	6.13	6.65
	052	27	31	24		2.64	2.48	105	108	57	60	5.5	5.4	4.9		138	141	13	11	0	0	0.1	0.1	1.4	1.3	0.6	0.4	3.6	1.8	0.43	0.41	146	133	30.6	30.2	336	328	91	92	292	237	4.77	4.4	14	13.1	5.7	3.7	5.59	4.86
	053	20	19	22	22	2.36	2.26	105	100	53	60	5.7	5.6	4.6	4.8	138	134	5	6	0	0	0.1	0.2	2.7	3	0.6	0.5	3.7	4.2	0.4	0.41	134	133	29.3	28.2	334	328	88	86	300	291	4.58	4.72	13.6	13	7.1	7.9	4.37	4.17
	057	34	24	37	26	2.4	2.31	104	108	78	75	5.5	5.5	4.5	4.4	139	140	9	13	0	0	0.2	0.2	2.4	1.8	0.6	0.5	2.5	2.1	0.44	0.431	151	149	32.4	32.3	347	346	93	94	264	265	4.66	4.61	14.1	13.8	5.7	4.5	5.51	5.35
	058	23	36	24	28	2.42	2.28	150	107	53	50	6.3	6	4		140	138	4	8	0	0	0.2	0.2	1.7	2.4	0.6	0.6	6.7	7	0.4	0.38	134	127	30.1	29.7	337	332	89	89	318	307	4.45	4.28	13.6	13.5	9.2	10.3	5.87	5.93
	059	26	32	21	23	2.42	2.47	106	107	66	67	5.5	5.1	4.8	5.2	137	141	4	9	0.1	0	0.2	0.3	2.8	2.3	0.6	0.6	4.9	3.8	0.4	0.4	132	131	28.3	27.5	331	325	85	85	245	248	4.67	4.77	13.9	13.3	8.5	7	4.85	4.69
	062	22	24	24	25	2.49	2.41	102	105	61	57	5.7	5.6	4.4	4.3	140	140	7	8	0.1	0.1	0.2	0.2	3.5	2.8	0.5	0.6	5.4	5.5	0.41	0.4	134	135	29.3	29.8	331	342	88	87	469	377	4.58	4.53	13	12.8	9.6	9.2	5.2	4.91
	071	31	27	25	34	2.37	2.34	108	105	87	95	5.2	5.1	4.4	4	143	141	12	15	0	0.1	0.2	0.3	1.5	1.8	0.3	0.4	1.7	1.9	0.39	0.38	130	131	29	30.3	338	347	86	87	138	167	4.49	4.33	13.7	14.3	3.7	4.5	4.65	5.09
	072	31	30	25	18	2.31	2.22	107	108	63	59	5.8	5.5	4	4.1	140	140	9	14	0	0	0.2	0.2	2.3	2.1	0.5	0.6	5.1	4.8	0.41	0.394	135	133	28.5	29.6	331	338	86	88	206	216	4.73	4.5	13.8	13.9	8.1	7.7	4.31	5.15
	077	22	18	18	19	2.29	2.3	107	106	55	60	5.3	5	4.5	4.4	138	140	8	9	0.1	0	0.1	0.1	1.7	2.1	0.6	0.5	2.2	2.1	0.39	0.39	131	129	29.4	29.7	336	335	88	89	308	282	4.45	4.34	14.1	14	4.6	4.8	3.57	4.16
[truncated: 7 more columns]

## Sheet: BOWEL DIARY
		Bowel diary information for completed subjects	Bowel diary information for completed subjects	Bowel diary information for completed subjects	Bowel diary information for completed subjects	Bowel diary information for completed subjects	Bowel diary information for completed subjects	Bowel diary information for completed subjects	Bowel diary information for completed subjects	Bowel diary information for completed subjects	Bowel diary information for completed subjects	Bowel diary information for completed subjects	Bowel diary information for completed subjects	Bowel diary information for completed subjects	Bowel diary information for completed subjects	Bowel diary information for completed subjects	Bowel diary information for completed subjects	Bowel diary information for completed subjects	Bowel diary information for completed subjects	Bowel diary information for completed subjects	Bowel diary information for completed subjects	Bowel diary information for completed subjects	Bowel diary information for completed subjects	Bowel diary information for completed subjects	Bowel diary information for completed subjects	Bowel diary information for completed subjects	Bowel diary information for completed subjects	Bowel diary information for completed subjects	Bowel diary information for completed subjects	Bowel diary information for completed subjects	Bowel diary information for completed subjects	Bowel diary information for completed subjects	Bowel diary information for completed subjects	Bowel diary information for completed subjects	Bowel diary information for completed subjects	Bowel diary information for completed subjects	Bowel diary information for completed subjects	Bowel diary information for completed subjects	Bowel diary information for completed subjects	Bowel diary information for completed subjects	Bowel diary information for completed subjects	Bowel diary information for completed subjects	Bowel diary information for completed subjects	Bowel diary information for completed subjects	Bowel diary information for completed subjects	Bowel diary information for completed subjects	Bowel diary information for completed subjects	Bowel diary information for completed subjects	Bowel diary information for completed subjects
		Time of bowel movement	Time of bowel movement	Time of bowel movement	Time of bowel movement	Time of bowel movement	Time of bowel movement	Time of bowel movement	Time of bowel movement	Time of bowel movement	Time of bowel movement	Time of bowel movement	Time of bowel movement	Time of bowel movement	Time of bowel movement	Time of bowel movement	Time of bowel movement	Time of bowel movement	Time of bowel movement	Time of bowel movement	Time of bowel movement	Time of bowel movement	Time of bowel movement	Time of bowel movement	Time of bowel movement	Time of bowel movement	Time of bowel movement	Time of bowel movement	Time of bowel movement	Time of bowel movement	Time of bowel movement	Time of bowel movement	Time of bowel movement	Time of bowel movement	Time of bowel movement	Time of bowel movement	Time of bowel movement	Time of bowel movement	Time of bowel movement	Time of bowel movement	Time of bowel movement	Time of bowel movement	Time of bowel movement	Time of bowel movement	Time of bowel movement	Time of bowel movement	Time of bowel movement	Time of bowel movement	Time of bowel movement
		Day -15	Day -15	Day -14	Day -14	Day -14	Day -13	Day -13	Day -13	Day -13	Day -12	Day -12	Day -12	Day -12	Day -11	Day -11	Day -11	Day -10	Day -10	Day -10	Day -10	Day -9	Day -9	Day -9	Day -9	Day -8	Day -8	Day -8	Day -8	Day -8	Day -8	Day -7	Day -7	Day -7	Day -7	Day -6	Day -6	Day -6	Day -6	Day -6	Day -5	Day -5	Day -5	Day -5	Day -4	Day -4	Day -4	Day -4	Day -3
	Bowel Movement #ð	1	2	1	2	3	1	2	3	4	1	2	3	4	1	2	3	1	2	3	4	1	2	3	4	0	1	2	3	4	5	1	2	3	4	1	2	3	4	5	1	2	3	4	1	2	3	4	1
	001			07:15:00			07:30:00				08:00:00				08:30:00			07:30:00				10:00:00					09:50:00					07:40:00				07:00:00					07:15:00				08:45:00				08:10:00
	002			08:10:00			09:30:00				07:30:00				11:00:00			08:00:00				09:30:00					10:00:00					09:00:00				08:30:00					08:45:00				08:00:00				10:00:00
	003	11:30:00		22:51:00			07:45:00	23:20:00			14:02:00				07:30:00	13:45:00		07:32:00									07:15:00					07:10:00	15:00:00	18:15:00							09:20:00				11:25:00				16:30:00
	004			07:30:00			07:00:00															08:00:00	09:30:00				07:00:00					07:30:00				07:15:00					07:00:00	17:00:00			07:45:00				08:30:00
	005			14:32:00											11:45:00							15:30:00														19:20:00					12:36:00				20:07:00
	006			18:40:00			21:00:00				06:30:00	20:45:00			08:55:00			08:20:00	13:30:00			10:25:00					14:40:00					14:30:00				10:20:00					17:00:00				16:20:00				09:00:00
	007			08:40:00			08:00:00	16:20:00			10:30:00	16:30:00	17:30:00		12:32:00	20:15:00		11:00:00	18:30:00	00:15:00		11:44:00	13:30:00	15:54:00	18:11:00		17:51:00					22:39:00				08:42:00	11:35:00				14:38:00	15:45:00			10:00:00				10:32:00
	008			10:30:00			12:00:00								11:30:00			13:00:00									09:00:00					14:00:00				09:00:00	17:00:00								16:30:00				21:30:00
	012			07:45:00	11:25:00		10:00:00				09:20:00				09:55:00	11:50:00		10:20:00	10:55:00	13:20:00							09:10:00	10:15:00				11:30:00				08:10:00	10:20:00				11:10:00	16:05:00			10:40:00				09:00:00
	014			07:34:00			16:57:00				08:56:00				09:16:00							18:36:00										16:49:00				14:13:00					14:46:00				17:23:00
	015			06:45:00	17:30:00		07:00:00				18:45:00				16:30:00	19:00:00		07:30:00	17:00:00	19:30:00		07:20:00					16:30:00									19:00:00					06:30:00	21:20:00			08:00:00				07:10:00
	017			10:00:00			12:30:00				09:45:00	19:00:00			03:10:00												08:15:00					09:30:00				02:30:00					08:00:00				09:15:00	20:00:00
	018			10:59:00			05:45:00				12:33:00	19:20:00			11:00:00			11:00:00				12:04:00	11:00:00				11:00:00					11:00:00									12:30:00				11:01:00				04:50:00
	019			07:45:00	12:15:00		07:55:00	22:20:00			07:50:00	22:45:00			10:55:00	12:45:00		07:00:00	09:30:00			09:45:00	16:15:00				09:30:00	11:30:00				09:30:00	11:30:00			08:30:00	23:30:00				09:30:00	11:30:00			10:05:00	12:30:00			07:15:00
	020			10:00:00	12:45:00		09:45:00				09:30:00				10:30:00							12:00:00					12:30:00	20:30:00				10:30:00				12:40:00					09:30:00				09:20:00				10:00:00
	021			10:20:00			07:15:00	15:50:00			12:25:00				08:05:00	18:23:00		06:23:00	18:02:00			07:30:00					07:25:00	10:34:00				06:25:00	20:05:00			08:05:00					07:22:00	12:50:00			18:40:00				06:20:00
	022			10:05:00							11:50:00				17:30:00			06:45:00	23:10:00			17:50:00					19:15:00	22:45:00				10:40:00	18:50:00			11:00:00									09:18:00	18:45:00			11:00:00
	023			12:00:00			07:30:00	09:45:00			07:00:00				07:25:00			06:00:00				16:15:00										15:25:00				12:05:00					07:55:00				07:15:00				07:15:00
	024	08:10:00	22:15:00	08:25:00			13:25:00	20:55:00			07:55:00				00:35:00			21:29:00									07:35:00					07:45:00				21:30:00					07:05:00	22:20:00			22:35:00
	025			08:30:00							08:30:00	12:40:00			08:45:00			07:40:00				08:50:00					07:30:00					07:40:00									09:50:00				08:20:00				09:30:00
	026						09:52:00				11:00:00				14:00:00							20:00:00	21:00:00									09:00:00									20:00:00				14:00:00
	028			07:30:00	11:20:00	20:10:00	07:40:00	10:15:00	16:30:00	21:10:00	06:40:00	10:15:00	17:30:00	19:40:00	08:10:00	11:00:00	18:40:00	07:10:00	09:10:00	16:20:00	20:20:00	08:10:00	11:40:00	20:10:00			08:00:00	11:45:00	15:10:00	17:40:00	22:15:00	07:50:00	12:15:00	17:30:00	20:10:00	07:20:00	09:10:00	11:30:00	17:40:00	21:40:00	07:30:00	10:20:00	18:40:00	23:15:00	06:30:00	10:30:00	15:10:00	21:20:00	05:30:00
	029			17:00:00			11:00:00				09:00:00				06:00:00			11:00:00									10:00:00					10:30:00				09:30:00					11:00:00				09:00:00				11:30:00
	031			07:30:00			08:00:00				07:00:00				08:30:00			08:00:00				08:00:00					07:30:00					08:00:00				13:00:00					14:00:00				14:00:00				14:15:00
	033			11:00:00			14:30:00								15:30:00			17:00:00				15:30:00	19:00:00				17:00:00					09:00:00				18:00:00													14:15:00
	034			07:08:00	12:00:00		20:20:00								12:00:00			08:34:00									08:04:00					07:30:00	10:18:00			07:34:00					07:00:00				07:12:00
	035			06:30:00			05:00:00	09:15:00			07:00:00	11:45:00			04:45:00	09:45:00		04:30:00	05:30:00			05:00:00					04:00:00	10:00:00				04:00:00	05:00:00	12:00:00		08:30:00					05:00:00	05:30:00	19:00:00		05:00:00				05:30:00
	037			07:15:00	14:45:00		09:30:00	12:40:00			12:30:00	20:30:00			08:30:00	12:40:00		08:30:00	12:30:00	19:00:00		07:15:00	13:15:00				07:30:00	12:40:00				09:30:00	12:50:00			08:15:00	12:45:00				08:30:00				08:25:00	12:30:00			08:35:00
	038						09:52:00				11:00:00				14:00:00							08:00:00	21:00:00									09:00:00									20:00:00				14:00:00
	039	10:12:00	17:55:00				09:12:00				15:53:00				18:46:00			17:02:00				11:19:00	19:37:00				14:08:00	17:19:00				10:04:00				16:16:00													07:29:00
	040			08:00:00			08:05:00				07:15:00				06:30:00	17:50:00		06:45:00	20:30:00			06:30:00	18:45:00				05:45:00	23:00:00				08:00:00				08:15:00					05:30:00	20:10:00			05:45:00	17:00:00			05:45:00
	041			14:41:00			10:08:00	20:59:00			15:24:00				09:00:00	22:30:00		11:10:00	17:50:00			09:11:00	22:01:00				04:05:00	19:30:00				13:00:00				08:35:00	09:40:00				17:00:00	22:30:00			11:00:00				14:00:00
	042			08:30:00	18:00:00		15:30:00				11:45:00				19:30:00			16:00:00				07:30:00					05:30:00					06:00:00				02:45:00					05:00:00				08:00:00				04:00:00
	044			09:35:00			08:15:00	19:10:00			06:45:00				06:00:00	19:00:00		07:10:00	18:00:00			07:00:00	14:45:00				08:30:00					08:10:00				06:00:00	09:15:00	17:30:00			07:25:00				06:50:00	18:30:00			09:15:00
	047			13:25:00	23:45:00		06:45:00	09:45:00	10:45:00		06:30:00	12:30:00			08:00:00	09:30:00	12:00:00					07:30:00	11:00:00	14:00:00	20:00:00		08:00:00					07:45:00	09:30:00	22:00:00		09:30:00	12:00:00				06:30:00	10:30:00	20:30:00		08:00:00	23:00:00			08:30:00
	048			10:45:00			09:35:00	01:50:00			09:55:00	14:50:00			10:25:00	19:55:00		10:09:00	18:53:00	22:51:00		10:40:00					09:10:00	23:03:00	13:40:00			09:37:00	14:35:00			07:29:00					09:36:00				10:05:00				16:39:00
	050			07:30:00	09:30:00		07:00:00	09:00:00			07:00:00	08:30:00			07:00:00	08:30:00	17:30:00	07:30:00	08:45:00			08:00:00	08:45:00			:	07:30:00	09:15:00				08:30:00	22:30:00			07:45:00	08:30:00				03:00:00	08:35:00			06:45:00	07:45:00			07:00:00
	052			07:00:00	20:00:00		08:00:00	18:00:00			08:30:00				08:00:00	19:00:00		08:00:00	15:00:00			07:30:00	16:00:00				08:00:00	16:00:00				08:00:00	19:00:00			08:00:00					08:00:00	15:00:00			09:00:00	19:00:00			08:00:00
	053										17:00:00							11:15:00				08:00:00										08:00:00	10:15:00								07:00:00								08:30:00
	057	06:10:00	08:50:00	07:30:00			09:20:00				06:10:00				06:10:00	09:15:00		06:10:00	09:30:00			06:20:00	10:10:00				06:10:00	09:20:00				10:20:00	14:50:00			07:20:00	12:30:00				06:15:00	09:10:00	13:30:00	18:30:00	06:10:00	09:40:00			06:20:00
	058			07:08:00			07:25:00				05:55:00				06:35:00			08:03:00	10:13:00	17:30:00		07:20:00					07:25:00	15:55:00				06:50:00				16:20:00					07:10:00				06:55:00				07:15:00
	059			16:30:00			09:45:00	10:05:00			07:50:00	09:50:00			07:00:00			14:15:00				07:30:00	14:50:00				07:30:00	14:10:00				09:45:00	15:20:00			08:45:00	16:10:00				16:30:00				09:30:00	14:10:00			15:10:00
	062			10:00:00	15:00:00		09:00:00				06:45:00				05:45:00	06:30:00		06:15:00				06:30:00	16:45:00				06:45:00					07:15:00	17:00:00			08:00:00					06:09:00	07:00:00			05:55:00	06:45:00			06:00:00
	071			13:15:00			15:40:00				11:15:00				13:30:00			14:00:00									07:30:00	11:15:00				13:10:00				11:30:00					14:00:00				13:30:00				13:45:00
	072			07:00:00	22:30:00		07:15:00	17:30:00			17:30:00				17:30:00			07:30:00	17:00:00			17:30:00					17:30:00	20:30:00				07:00:00				02:00:00	10:00:00	15:00:00	17:30:00		16:30:00	17:15:00	23:30:00		17:00:00				16:45:00
	077			11:00:00	17:00:00		10:00:00	18:00:00			09:00:00	18:00:00			10:00:00	17:00:00		08:00:00	19:00:00			09:30:00	18:00:00				09:00:00	17:00:00				09:30:00	18:00:00			08:30:00	18:00:00				08:30:00	19:00:00			09:30:00	17:00:00			11:00:00
[truncated: 2,177 more columns]

## Sheet: ABDOMINAL DISCOMFORT QUESTIONNA
		Questionnaire information for completed subjects	Questionnaire information for completed subjects	Questionnaire information for completed subjects	Questionnaire information for completed subjects	Questionnaire information for completed subjects	Questionnaire information for completed subjects	Questionnaire information for completed subjects	Questionnaire information for completed subjects	Questionnaire information for completed subjects	Questionnaire information for completed subjects	Questionnaire information for completed subjects	Questionnaire information for completed subjects	Questionnaire information for completed subjects	Questionnaire information for completed subjects	Questionnaire information for completed subjects	Questionnaire information for completed subjects	Questionnaire information for completed subjects	Questionnaire information for completed subjects	Questionnaire information for completed subjects	Questionnaire information for completed subjects	Questionnaire information for completed subjects	Questionnaire information for completed subjects	Questionnaire information for completed subjects	Questionnaire information for completed subjects	Questionnaire information for completed subjects	Questionnaire information for completed subjects	Questionnaire information for completed subjects	Questionnaire information for completed subjects	Questionnaire information for completed subjects	Questionnaire information for completed subjects	Questionnaire information for completed subjects	Questionnaire information for completed subjects	Questionnaire information for completed subjects	Questionnaire information for completed subjects	Questionnaire information for completed subjects	Questionnaire information for completed subjects	Questionnaire information for completed subjects	Questionnaire information for completed subjects	Questionnaire information for completed subjects	Questionnaire information for completed subjects	Questionnaire information for completed subjects	Questionnaire information for completed subjects	Questionnaire information for completed subjects	Questionnaire information for completed subjects	Questionnaire information for completed subjects	Questionnaire information for completed subjects	Questionnaire information for completed subjects	Questionnaire information for completed subjects
		Abdominal Bloating Level	Abdominal Bloating Level	Abdominal Bloating Level	Abdominal Bloating Level	Abdominal Bloating Level	Abdominal Bloating Level	Abdominal Bloating Level	Abdominal Bloating Level	Abdominal Bloating Level	Abdominal Bloating Level	Abdominal Bloating Level	Abdominal Bloating Level	Abdominal Bloating Level	Abdominal Bloating Level	Abdominal Bloating Level	Abdominal Bloating Level	Abdominal Bloating Level	Abdominal Bloating Level	Abdominal Bloating Level	Abdominal Bloating Level	Abdominal Bloating Level	Abdominal Bloating Level	Abdominal Bloating Level	Abdominal Bloating Level	Abdominal Bloating Level	Abdominal Bloating Level	Abdominal Bloating Level	Abdominal Bloating Level	Abdominal Bloating Level	Abdominal Bloating Level	Abdominal Bloating Level	Abdominal Bloating Level	Abdominal Bloating Level	Abdominal Bloating Level	Abdominal Bloating Level	Abdominal Bloating Level	Abdominal Bloating Level	Abdominal Bloating Level	Abdominal Bloating Level	Abdominal Bloating Level	Abdominal Bloating Level	Abdominal Bloating Level	Abdominal Bloating Level	Abdominal Bloating Level	Abdominal Bloating Level	Abdominal Bloating Level	Abdominal Bloating Level	Abdominal Bloating Level
		Day -15	Day -14	Day -13	Day -12	Day -11	Day -10	Day -9	Day -8	Day -7	Day -6	Day -5	Day -4	Day -3	Day -2	Day -1	Day 0	Day 1	Day 2	Day 3	Day 4	Day 5	Day 6	Day 7	Day 8	Day 9	Day 10	Day 11	Day 12	Day 13	Day 14	Day 15	Day 16	Day 17	Day 18	Day 19	Day 20	Day 21	Day 22	Day 23	Day 24	Day 25	Day 26	Day 27	Day 28	Day 29	Day 30	Day 31	Day 32
	001		4	3	3	3	5	5	4	5	7	5	7	4	6	6		5	6	5	3	7	7	6	6	5	6	9	7	5	5	5	5	7	6	5	5	5	7	3	4	5	4	8	6	4	2	4	5
	002		2	1	1	2	1	1	1	1	1	1	1	1	2	2		4	3	3	3	2	2	3	4	4	3	2	3	3	1	1	1	1	1	1	1	1	0	1	1	0	1	1	1	1	1	1	1
	003	0	1	0	0	5	1	3	3	5	3	1	0	8	6	5		0	1	5	5	7	6	6	2	2	2	3	0	0	0	0	0	0	0	0	0	0	0	0	0	4	0	0	0	0	0	0	0
	004		0	0	0	0	0	1	0	0	0	0	0	1	0	0	1	1	3	2	1	2	1	0	0	1	0	0	0	0	1	0	0	0	0	2	1	0	0	0	0	0	0	0	0	0	2	3	0
	005			3	5	6	5	8	5		6	8	6	7	9	9		4	5	10	5	5	5	7	4	7	8	7	3	5	4	5	6	9	5	6	4	7	8	6	7	6	7	7	7	6	8	7	4
	006		2	5	2	1	2	2	2	2	2	1	1	2	2	1	1	2	1	5	2	1	4	4	4	6	3	2	1	2	9	5	1	1	1	1		1	1	1	1	2	1	5	4	1	4	1	1
	007		6	7	7	6	6	6	8	6	5	7	7	7	4	5		3	6	4	6	5	5	4	6	4	4	5	5	6	4	4	4	4	6	6	4	5	5	6	5	5	7	8	6	5	6	5	6
	008	1	1	0	0	1	0	0	0	0	4	0	0	0	0	0	0	0	0	0	0	1	1	0		1	0	2	0	0	0	0	1	0	0	2	1	1	1	0	0	0	0	0	1	3		0	0
	012		0	0	6	0	2	0	0	0	0	0	0	0	0	0		0	0	6	7	4	1	2	0	0	0	0	0	0	0	0	0	0	0	0	0	0	0	0	0	0	0	0	0	0	0	0	0
	014		2	2	3	5	1	3	7	5	2	3	4	8	6	6	7	2	3	1	3	2	0	3	2	2	2	3	3	4	3	3	2	3	5	4		2	2	3	3	1	2	2	2	2	1	1	1
	015		0	1	0	3	1	3	3	4	3	2	2	4	1	0	0	0	0	1	2	3	4	8	8	4	4	4	5	5	5	2	2	2	2	2	2	3	0	1	2	0	3	2	3	4	2	3	3
	017		2	5	4	4	2	7	3	2	2	3	2	3	3	2		3	2	2	2	3	3	2	4	4	2	3	3	2	2	2	2	1	1	1	1	3	2	1	3	1	1	1	1	2	2	3	3
	018		0	0	4	1	1	1	2		2	3	3	1		3		0	0	0	1	2	1	2	3	1	1	2	1	7	2	3	0	3	3	1	2	2	1	2	2	3	3	1	1	1	1	1	1
	019		0	0	0	0	0	0	0	0		0	0	0	0	0	0	0	0	0	0	0	0	0	0	0	0	0	0	0	0	0	0	0	0	0	0	0	0	0	0	0	0	0	0	0	0	0	0
	020		4	0	0	0	0	3	0	7	3	0	1	0	0	0	3	0	0	0	0	0	0	0	0	3	2	2	0	1	0	0	0	0	0	0	5	0	0	0		0	0	0	0	0	0	0	2
	021		0	0	0	0	1	0	0	0	0	0	0	1	1	0		0	0	0	0	0	0	0	0	0	0	0	0	0	0	0	0	0	0	0	0	0	0	1	1	1	0	0	0	0	0	0	0
	022		2	6	3	3	2	3	4	3	3	3	3	1	1	1	2	4	1	0	1	1	2	1	1	0	1	1	1	1	1	1	2	1	1	3	1	1	2	1	1	1	1	1	1	1	1	4	1
	023		0	0	0	0	0	0	0	0	0	0	0	2	0	1	0	0	1	0	0	0		0	0	0	0	0	0	0	0	0	0	0	0	0	0	0	0	0	0	0	0	0	0	0	0	0	1
	024	0	1	3	0	0	0	0	4	3	0	0	0	0	2	0	0	0	0	0	0	0	0	0	0	2	2	2	0	2	2	3	2	3	3	4	1	5	0	0	0	2	1	0	2	6	2	0	6
	025		3	6	4	6	0	2	3	7	6	6	4	5	5	2		6	6	6	7	5	6	5	7	6	5	5	5	6	7	7	7	5	6	7	4	5	0	1	1	1	1	1	1	1	1	6	1
	026		6	3	7	7	7	8	7	5	5	3	2	4	2	2		2	3	4	1	2	2	2	2	1	1	2	3	5	5	2	1	1	1	1	1	1	2	1	1	1	1	1	1	1	1	1	2
	028		4	2	5	4	5	4	7	7	7	3	6	5	5	3	2	3	2	3	4	6	5	6	2	5	3	4	3	3	4	2	2	6	7	3	3	2	3	2	4	3	3	2	2	4	3	3	2
	029	3	2	1	1	0	0	0	3	3	1	0	0	1	2	0	0	0	0	0	1	0	0	0	0	0	1	0	0	0	0	0	0	0	0	0	0	0	0	0	0	0	0	0	0	0	0	0	0
	031		0	0	0	0	0	0	0	0	0	0	0	0	0	0	0	0	0	0	0	0	0	0	0	0	0	0	0	0	0		0	0	0	0	0	0	0	0	0	0	0	0	0	0	0	0	0
	033		0	0	0	0	2	0	0	0	0	0	0	0	0	0	0	0	0	0	0	0	0	0	0	0	0	0	0	0	0	0	0	0	0	0	0	0	0	4	0	0	0	0	0	0	0	0	0
	034		5	3	2	3	4	2	2	3	3	3	2	3	2	2	2	3	5	3	3	2	0	1	0	1	1	0	0	1	0	0	0	0	0	0	0	0	0	0	0	0	0	0	0	0	0	0	0
	035		1	1	2	1	5	2	4	7	4	2	2	2	2	2	2	2		2	6	3	3	6	2	3	3	4	3	6	2	2	2	3	2		2	2	3	2	2	1	5	2	2	2	2	2	2
	037		3	2	3	4	3	3	3	3	3	3	3	3	3	3		1	3	2	3	4	3	3	3	3	3	3	3	2	3	3	2	2	3	2	3	3	2	3	3	3	2	3	3	3	3	3	3
	038		6	3	7	7	7	8	7	5	5	3	2	4	2	2	3.5		1.5	5.5	5.5	2.5	1.5	2	1.5	3.5	4.5	3.5	1.5	3.5	4.5	5.5	2.5	3.5	3.5	3.5	4.5	1.5	1.5	1.5	1.5	2.5	3.5	1.5	4.5	2.5		2.5	2.5
	039	0	0	0	0	0	0	0	0	0	0	0	0	0	0	0	0	0	0	0	0	0	0	0	0	0	0	0	0	0	0	0	0	0	0	0	0	0	0	0	0	0	0	0	0	0	0	0	0
	040		1	1	2	1	0	0	1	0	0	0	0	0	0	0			0	0	0	0	0	0	0	0	0	0	0	0	0	0	0	0	0	0	0	0	0	0	0	0	0	0	0	0	0	0	0
	041		3	2	1	1	1	3	1	2	2	2	1	1	1	2	1	2	2	1	2	1	2	1	1	1	1	1	2	2	1	1	2	1	1	2	1	1	1	1	2	1	2	2	1	1	1	1	2
	042		0	0	0	0	0	0	0	0	0	0	0	0	0	0	0	0	0	0	0	0	0	0	0	0	0	0	0	0	0	0	0	0		0	0		0	0	0		0	0	0		0	0	0
	044		0	0	0	0	0	0	0	0	2	0	0	0	0	0	0	0	0	0	0	0	0	0	0	0	0	0	0	0	0	0	1	0	0	0	0	0	0	0	0	0	0	0	0	0
	047		0	0	0	0	0	0	0	0	0	0	0	0	0	0	0	0	0	0	0	0	0	0	0	0	0		0	0	0	0	0	0	0	0	0	0	0	0	0	0	0	0	0	0	0	0	0
	048		0	0	0	0	2	0	0	0	0	0	0	0	0	0	0	0	0	0	0	0		0	0	0	0	0	0	0	0	0	0	0	0	0	0	0	0	0	0	0	0	0	0		0	0	0
	050		6	1	2	4	3	1	2	3	2	0	0	0	3	2	4	2	2	1	0	2	3	1	2	2	2	1	0	0	1	1	1	1	2	0	1	1	3	2	2	1	3	1	4	2	2	3	2
	052		2	2	2	2	2	2	2	2	2	2	2	2	2	2	2	2	2	1	1	2	2	8	2	6	2	2	2	2	2	3	3	5	4	2	2	2	3	2		1	3	4	3	2	1	2	2
	053		4	4	2	3	1	0	1	1	1	1	3	3	2	2	2	2	2	2	1	1	1	1	1	3	2	2	1	1	1	1	0	1	1	1	1	0	0	1	1	0	1	0	2	1	1	1	0
	057	0	0	0	0	0	0	0	0	0	0	0	0	0	0	0	0	0	0	0	0	0	0	0	0	0	0	0	0		0	0	0	0	0	0	0	0	0	0	0	0	0	0	0	0	0	0	0
	058		0	0	0	0	0	0	0	0	1	0	0	0	0	0	0	0	2	0	0	0	0	0	0	0	0	0	0	0	0	0	0	0	0	0	0	0	0	0	0	0	0	0	0	0	0	0	0
	059		2	2	1	1	1	2	2	2	1	5	6	2	1	2	3	2	3	3	6	4	4	3	5	3	3	3	3	3	3	4	3	5	3	4	2	5	3	2	3	3	3	3	3	3		2	4
	062		3	2	3	1	2	3	1	2	4	2	5	3	3	2		2	4	4	3	4	4	4	4	4	4	5	4	5	6	4	4	4	7	5	5	4	5	3	3	3	4	4	3	3	7	3	4
	071		3	1	1	1	1	2	4	1	1	3	1	1	3	4	1	1	1	2	1	1	1	1	1	1	2	1	2	3	1	1	4	1	1	2	1	1	1	1	1	1	1	1	1	1
	072		9	8	8	9	8	8	10	10	10	10	8	10	10	9	9	10	10	10	8	8	7	8	7	7	6	6	6	8	8	10	6	7	6	5	7	7	8	7	5	3	6	4	6	7	3	5	4
	077		3	3	4	3	4	4	3	3	4	3	4	3	3	4	5	5	3	3	3	5	4	4	5	5	4	5	6	4	4	5	5	6	4	6	6	5	5	5	5	5	5	5	5	5	5	5	5
[truncated: 713 more columns]

## Sheet: 3-DAY FOOD RECORD
SubjectNum	DiaryDate	Week	Energy	PerProteinCals	PerCarbCals	PerLipidCals	ProteinMass	CarbMass	LipidMass	Fiber	SaturatedFats	MonoUnsatFats	PolyUnsatFats	Omega3	Omega6	VitA	VitB1	VitB2	VitB3	VitB5	VitB6	VitB12	VitC	VitD	VitE	Calcium	Magnesium	Phosphorous	Potassium	Sodium
001	03/28/16	-1	2011.46	18.58	39.504	41.917	94.127	200.133	94.381	8.582	28.838	21.29	5.457	0.198	2.088	496.315	0.994	2.014	13.068	4.682	0.704	5.188	38.122	192.233	1.464	910.947	151.76	854.164	1785.53	3515.41
001	03/29/16	-1	1418.28	13.759	61.586	24.655	50.144	224.439	39.933	25.566	12.932	5.1	3.488	0.146	2.66	3627.13	0.803	1.377	9.168	5.027	1.085	0.619	50.749	33.65	4.853	455.101	154.231	505.524	2956.96	1748.64
001	03/27/16	-1	2074.39	29.409	34.329	36.263	155.182	181.144	85.044	18.198	30.672	7.927	6.244	0.466	5.566	45.922	0.8	1.392	37.446	6.14	2.073	0.776	133.229	32.044	1.637	1191.31	197.689	284.181	2590.85	3475.51
001	04/03/16	0	1837.79	14.357	52.033	33.61	67.082	243.122	69.795	26.368	28.089	4.028	2.926	0.293	2.623	724.132	0.962	1.016	9.238	3.333	0.857	0.199	359.977	1.775	3.784	985.801	137.563	392.377	1571.92	2893.97
001	04/04/16	0	2002.83	20.362	51.105	28.533	104.186	261.482	64.885	16.905	13.961	9.377	2.971	0.182	1.722	21.354	0.748	0.921	30.584	3.191	1.632	0.83	47.866	18.743	0.461	289.247	140.415	323.831	1888.18	3696.22
001	04/05/16	0	2734.42	17.641	49.986	32.372	121.945	345.533	99.456	37.099	31.178	29.068	10.739	0.331	7.555	3755.8	3.191	2.923	26.104	10.589	3.313	5.304	98.945	101.17	5.396	993.57	422.735	1682.61	4646.35	2641.43
001	05/03/16	4	1331.5	25.698	44.265	30.037	87.834	151.295	45.628	17.743	17.173	10.999	7.59	0.392	6.143	2205.57	2.048	1.909	29.244	6.568	2.686	1.729	310.879	39.608	6.339	814.698	340.913	1260.68	3659.65	1478.99
001	05/01/16	4	2183.79	24.359	52.736	22.905	131.746	285.226	55.059	19.965	22.991	7.133	4.996	0.519	4.409	556.52	1.052	2.917	29.042	8.054	1.859	4.618	160.104	281.13	3.239	972.313	279.269	1313.21	2949.7	3794.16
001	05/02/16	4	1240.6	27.65	39.955	32.395	86.995	125.709	45.299	12.593	13.147	13.537	5.61	0.622	3.99	267.304	0.952	2.211	24.765	6.172	2.198	3.794	53.766	116.405	2.758	399.669	289.506	944.665	2572.94	1948.89
001	05/31/16	8	1096.52	25.119	42.728	32.152	70.253	119.5	39.965	17.863	8.491	13.048	5.316	0.199	2.674	878.486	1.395	1.862	27.13	5.151	1.619	0.772	61.396	31.332	1.184	434.176	203.658	460.99	1930.01	1349.35
001	05/29/16	8	1296.97	19.48	43.993	36.526	65.252	147.363	54.378	24.123	10.279	9.713	23.484	0.196	21.584	1018.44	1.173	1.899	27.26	10.931	2.401	0.363	118.857	27.822	21.619	573.696	273.637	1117.54	3139.67	820.155
001	05/30/16	8	2065.68	23.392	43.284	33.324	119.6	221.306	75.724	17.231	18.686	9.924	1.017	0.005	0.824	14.691	0.696	1.837	12.655	4.299	1.064	6.435	18.419	46.081	0.298	484.538	151.616	1102.05	1838.86	3488.82
002	03/27/16	-1	1373.88	18.663	19.118	62.219	67.063	68.696	99.367	25.459	24.857	53.235	13.13	3.278	6.93	550.127	0.8	1.023	21.934	6.568	2.181	3.827	135.447	319.782	5.815	600.588	198.852	841.812	2874.14	792.577
002	03/28/16	-1	1679.89	28.434	30.367	41.199	120.979	129.201	77.906	41.455	17.691	43.652	10.418	0.526	4.158	513.202	0.604	0.961	33.265	5.876	2.388	0.825	284.295	13.608	10.573	908.014	283.413	536.513	3330.51	2563.44
002	03/29/16	-1	1384.71	24.141	30.274	45.585	84.879	106.444	71.233	20.116	20.027	33.767	12.752	3.315	3.466	611.225	1.031	0.945	27.703	3.868	2.333	5.962	54.372	399.161	8.714	307.761	253.33	1074.9	2817.76	415.056
002	04/03/16	0	1353.09	23.166	21.41	55.425	81.441	75.268	86.6	24.405	20.062	50.831	9.108	0.576	5.879	301.087	1.404	1.495	22.776	7.352	2.078	2.502	177.468	62.206	6.662	446.027	182.314	1155.35	3131.89	819.664
002	04/04/16	0	1258.54	14.843	49.856	35.301	47.845	160.704	50.574	22.553	19.917	18.694	5.801	0.16	0.488	1017.41	0.639	0.755	11.914	1.594	0.976	2.291	118.005	22.68	5.303	671.628	193.563	540.117	2180.71	1389.36
002	04/05/16	0	1348.45	20.043	37.784	42.173	68.09	128.361	63.676	34.552	19.298	27.863	4.73	0.332	4.092	180.91	0.734	1.211	13.748	4.794	1.686	4.631	127.924	55.055	5.946	283.318	159.491	630.007	2524.51	1227.72
002	05/01/16	4	1053.47	17.607	42.865	39.528	48.461	117.98	48.353	21.483	10.221	29.222	7.183	1.683	0.8	1613.78	0.521	0.57	15.73	2.61	1.525	7.162	62.159	966.613	3.546	288.118	168.893	779.776	2964.8	1291.43
002	05/03/16	4	1419.05	16.756	52.011	31.234	60.149	186.704	49.831	15.971	23.45	16.634	7.08	0.095	1.814	604.797	1.139	0.683	17.691	2.558	1.173	0.962	13.096	13.58	6.503	154.94	210.831	867.172	1759.25	1235.71
002	05/02/16	4	1095.74	22.807	50.418	26.775	63.507	140.391	33.135	20.739	8.325	15.263	6.689	0.312	3.198	90.525	0.468	0.576	26.293	2.687	1.829	0.553	28.677	16.408	5.718	160.327	207.596	369.501	2446.02	153.827
002	05/29/16	8	1225.62	20.288	49.181	30.531	63.598	154.172	42.536	24.251	10.603	25.237	3.465	0.19	0.875	110.41	0.544	0.736	22.951	3.831	1.68	0.471	105.179	68.592	1.093	658.286	216.465	408.896	1866.33	1510.95
002	05/30/16	8	1013.35	18.295	47.157	34.548	47.997	123.716	40.284	10.07	8.314	27.205	3.172	0.152	0.892	784.647	1.813	0.651	9.081	1.702	0.991	1.05	178.191	17.01	8.591	173.013	90.88	454.011	1399.45	181.947
002	05/31/16	8	1610.71	17.945	45.337	36.717	72.997	184.42	66.381	29.138	21.921	28.757	3.901	0.104	1.769	494.709	0.2	0.334	4.507	0.683	0.427	3.753	226.958	36.287	8.45	1170.69	46.15	289.634	705.006	3314.41
003	03/27/16	-1	2213.06	14.094	49.662	36.244	79.323	279.506	90.661	24.799	21.312	30.512	14.167	0.66	7.321	748.564	1.759	1.02	19.352	2.953	1.365	0.458	169.849	527.905	3.674	1394.95	181.208	807.403	2010	4302.86
003	03/28/16	-1	2229.98	15.182	53.468	31.351	86.492	304.61	79.382	23.338	30.496	22.097	13.291	0.648	10.597	227.311	2.304	2.868	30.228	2.195	1.668	0.518	15.35	43.75	4.863	1402.51	228.757	1205.24	1442.12	2911.02
003	03/29/16	-1	1794.97	10.123	49.442	39.875	46.14	225.35	80.775	23.197	16.735	22.08	14.348	0.415	9.133	504.214	1.775	2.106	20.315	3.202	1.068	0.141	41.527	162.741	5.191	838.133	129.9	547.308	1068.52	3614.23
003	04/03/16	0	1987.59	9.804	52.897	37.299	51.591	278.348	87.23	22.539	25.11	20.461	12.107	0.505	7.601	203.288	1.428	1.721	20.037	3.504	1.301	0.304	17.071	93.197	1.451	634.468	137.159	763.885	1015.01	1726.32
003	04/04/16	0	3088.62	15.7	43.326	40.649	123.105	339.724	141.661	16.368	48.342	30.493	10.905	0.582	6.516	252.589	1.699	2.888	25.74	5.521	1.444	0.794	40.431	67.019	1.861	1834.95	197.3	1207.95	2075.92	5680.31
003	04/05/16	0	1767.59	13.919	37.015	49.065	61.736	164.173	96.718	13.897	40.858	29.313	10.69	0.23	3.467	449.263	1.23	2.082	10.002	4.57	0.319	0.764	63.54	208.314	1.583	1137.17	164.2	579.722	1634.07	2975.17
003	05/01/16	4	2108.68	13.422	40.088	46.49	70.921	211.827	109.179	13.153	41.926	25.403	10.547	0.582	5.252	546.117	0.949	1.268	9.9	2.056	0.429	1.563	53.9	273.46	0.294	1187.07	95.933	569.405	893.753	2725.28
003	05/02/16	4	4622.22	15.619	19.165	65.216	190.774	234.077	354.02	53.738	60.003	156.599	96.563	0.203	96.361	139.82	2.907	1.616	84.889	10.876	1.922	1.339	51.404	46.9	42.561	586.424	1106.41	2486	4547.33	2787.21
003	05/03/16	4	2498.07	14.265	55.703	30.032	90.274	352.511	84.469	25.048	28.88	15.522	1.964	0.047	0.053	143.319	1.651	2.388	23.247	1.956	0.168	0.332	149.567	125.463	0.119	1899.67	40.234	792.452	2464.83	4701.95
003	05/29/16	8	2779.35	16.05	29.475	54.476	113.81	209.008	171.685	18.687	79.021	45.504	7.165	0.399	6.098	668.203	1.395	2.148	27.965	6.678	2.497	5.823	107.703	147.504	7.072	506.775	296.545	1308.06	4087.91	2766.17
003	05/30/16	8	3284.53	17.304	50.702	31.994	141.851	415.623	116.562	23.503	46.336	11.713	4.097	0.282	0.909	249.209	1.819	1.239	20.674	4.951	1.037	0.67	135.744	518.005	0.293	3122.89	155.565	509.113	1512.85	3460.99
003	05/31/16	8	2358.03	20.192	48.063	31.745	120.043	285.745	83.881	11.23	33.848	21.437	6.574	0.48	5.756	264.683	0.53	0.966	9.294	2.931	0.905	4.129	68.401	112.959	1.268	194.302	194.471	805.938	1991.64	4009.18
004	03/26/16	-1	1891.42	13.167	52.096	34.736	62.388	246.84	73.149	14.578	21.097	9.407	2.175	0.248	1.821	374.436	0.347	0.331	2.174	1.216	0.383	0.397	121.608	13.338	1.105	493.363	86.875	337.928	1216.57	3153.27
004	03/25/16	-1	3883.75	11.324	49.218	39.458	112.224	487.759	173.796	36.204	47.509	27.122	12.611	0.207	11.931	111.187	0.998	1.234	17.476	2.564	1.243	1.206	64.23	2.8	6.665	1376.69	296.591	1177.89	1579.71	4974.99
004	03/24/16	-1	3242.92	17.134	40.504	35.431	141.267	333.953	129.834	23.353	44.735	29.83	4.124	0.76	3.375	597.02	0.776	1.256	26.104	3.309	2.311	6.554	71.274	201.159	1.719	750.886	219.337	978.138	2982.55	4478.21
004	04/04/16	0	1989.24	14.472	37.581	47.947	72.593	188.513	106.894	9.445	36.044	15.55	15.364	1.181	4.947	393.693	0.872	1.334	9.208	3.721	0.885	5.309	116.307	84.909	1.164	902.415	143.571	674.319	1407.71	2719.26
004	04/05/16	0	2703.03	17.214	42.111	40.675	116.212	284.299	122.047	20.71	46.51	28.317	10.919	0.472	4.739	249.089	0.403	0.905	3.256	2.342	0.443	1.277	75.427	33.024	1.872	737.143	134.85	506.195	955.255	4642.72
004	04/03/16	0	2880.72	9.564	71.171	19.264	70.337	523.397	62.964	18.283	24.865	8.401	2.713	0.172	2.293	215.313	0.469	0.566	4.329	1.226	0.283	0.757	134.401	38.511	1.342	1137.98	35.467	458.78	819.162	2934.74
004	05/01/16	4	1147.88	18.91	36.357	44.732	53.808	103.452	56.57	10.392	28.894	1.589	0.547	0.001	0.047	290.899	0.156	0.155	2.018	0.791	0.335	0.147	8.724	20.252	0.268	683.249	29.402	106.838	520.667	2889.6
004	05/02/16	4	1148.46	12.521	39.149	48.33	36.813	115.103	63.155	9.022	26.551	13.372	12.863	1.286	11.511	379.279	0.788	0.941	6.695	2.382	0.42	1.119	118.263	12.023	4.061	515.575	73.847	391.015	641.065	1860.77
004	05/03/16	4	2187.22	17.793	34.076	48.132	97.89	187.475	117.693	21.122	54.508	26.505	12.754	0.891	4.761	1018.88	1.154	1.41	13.798	3.614	1.173	1.269	197.604	33.737	3.386	1699.54	189.456	1131.09	1799.77	6034.71
004	05/31/16	8	2141.33	14.017	61.814	23.71	75.842	334.468	57.02	18.448	20.61	11.947	4.288	0.381	3.553	324.384	1.38	1.353	15.238	3.61	1.267	0.862	81.643	133.024	2.764	904.945	209.705	721.476	3102.84	2844.35
004	05/29/16	8	1529.35	14.44	49.193	36.367	56.259	191.656	62.972	15.093	22.132	2.513	0.428	0.106	0.318	107.885	0.034	0.074	0.831	0.148	0.199	0.071	29.224	2.8	0.465	356.202	9.724	128.352	247.898	2519.1
004	05/30/16	8	1773.82	22.476	29.81	47.714	100.085	132.743	94.431	6.672	38.841	25.049	11.911	0.719	11.186	784.764	0.678	2.453	6.831	5.174	0.933	3.674	25.699	165.568	4.872	769.43	115.948	1128.68	1334.77	3303.74
005	03/27/16	-1	2132.67	14.52	48.363	37.117	80.593	268.436	91.563	36.929	30.91	28.17	18.128	0.367	5.443	3701.63	1.052	0.554	4.568	2.485	0.789	0	101.246	0	1.868	251.781	552.966	872.064	2660.07	3232.39
005	03/25/16	-1	2311.53	15.472	50.642	33.887	92.403	302.455	89.95	28.85	20.883	19.794	10.824	1.212	8.648	1313.01	1.206	0.825	10.223	2.837	1.184	1.442	124.667	78.765	2.226	506.305	124.742	643.052	1794.64	5058.84
005	03/26/16	-1	1406.99	21.204	57.667	21.129	77.229	210.038	34.204	25.827	7.927	10.809	3.371	0.503	1.795	466.2	0.503	1.095	7.324	5.849	1.704	1.287	250.839	57.72	6.988	226.721	171.974	570.12	2318.8	1784.41
005	03/31/16	0	3101.51	18.626	40.501	40.873	148.878	323.734	145.203	42.31	33.763	9.419	8.86	0.167	0.288	3396.41	0.694	0.693	22.45	4.347	1.836	0	101.177	0	1.376	307.26	300.021	744.408	2716.43	6066.51
005	04/01/16	0	1343.25	22.247	58.29	19.463	74.794	195.974	29.082	12.727	13.374	0.343	0.524	0.23	0.289	153.832	0.167	0.243	2.157	2.211	0.62	0	102.786	0	2.451	96.036	72.378	271.108	622.657	8164.52
005	04/02/16	0	2141.99	14.259	41.431	44.31	77.761	225.933	107.392	18.677	26.5	12.057	4.768	0.068	1.274	3.295	0.181	0.204	2.631	0.288	0.146	0	9.997	0	0.083	25.495	54.394	183.589	367.522	8014.59
005	05/03/16	4	1611.83	22.48	37.999	39.521	90.629	153.195	70.812	13.304	19.523	23.438	11.851	0.056	0.129	19.464	0.144	0.153	1.307	0.747	0.556	0	75.583	0	0.488	602.271	50.28	74.74	734.333	3041.44
005	05/01/16	4	2226.17	21.248	44.754	33.998	116.505	245.387	82.851	29.912	20.948	11.2	6.725	0.26	6.307	1851.78	2.169	3.282	61.992	4.36	2.937	2.724	63.835	188.192	2.577	1996.76	388.659	1761.76	4330.61	4453.3
005	05/02/16	4	1545.2	14.468	38.965	46.566	59.574	160.442	85.217	23.214	16.259	18.125	11.706	0.097	11.605	151.88	0.461	0.283	11.761	1.777	0.947	0	105.025	0	5.88	228.052	203.144	330.655	1417.87	2140.19
005	06/04/16	8	2034.11	21.497	55.435	23.068	114.948	296.423	54.822	21.115	11.32	19.211	11.595	0.456	10.666	93.562	1.265	1.956	50.938	6.317	2.291	0.742	201.097	100.131	3.746	650.713	237.445	1057.69	3072.73	1454.82
005	06/03/16	8	1517.99	19.744	38.629	41.628	74.87	146.485	70.159	13.71	26.4	0	0	0	0	0	0.806	0.984	14.336	0	0.076	0	4.4	0	0	836.877	0	554.877	441.962	3097.51
005	06/02/16	8	2629.65	20.517	42.988	36.495	136.434	285.864	107.86	20.684	36.119	35.02	8.934	0.455	6.733	316.551	1.513	1.413	37.402	7.91	3.27	3.62	92.847	167.828	2.75	433.649	243.511	938.108	3828.88	6160.21
006	04/07/16	-1	1683.29	14.864	34.337	50.799	62.973	145.467	95.648	10.509	37.066	23.209	5.437	0.241	1.559	1012.18	0.369	1.328	8.499	4.113	0.437	2.886	20.611	64.448	1.531	650.451	126.679	674.145	1506.81	3349.9
006	04/08/16	-1	2793.05	14.037	42.035	43.928	97.786	292.825	136.004	9.629	45.383	39.55	24.102	0.998	13.547	1225.87	1.338	2.181	15.421	5.879	1.201	4.61	63.372	81.553	3.145	567.312	187.276	895.005	2162.53	6119.08
006	04/09/16	-1	1947.44	15.791	32.815	51.394	77.617	161.302	112.277	15.31	50.573	21.671	7.413	0.552	6.731	8139.05	0.92	4.68	24.353	15.019	1.55	31.305	22.694	88.985	3.562	531.758	141.808	1129.56	1453.14	2090.91
006	04/14/16	0	3911.38	9.292	45.503	45.205	92.332	452.157	199.64	29.111	75.231	25.57	6.081	0.453	4.519	692.209	0.648	1.438	10.889	4.139	0.386	2.348	51.342	59.705	1.866	1070.67	157.267	580.318	1428.86	6792.28
006	04/15/16	0	3153.38	15.786	41.201	43.012	123.646	322.707	149.73	20.143	48.33	13.241	5.461	0.463	5.149	38.435	0.286	0.718	9.423	2.95	0.512	3.306	20.608	71.52	0.168	448.76	48.022	293.797	1542.92	7115.02
006	04/16/16	0	1797.77	21.64	32.027	46.333	98.953	146.454	94.166	17.268	41.346	25.28	9.076	0.786	8.263	974.509	0.8	2.005	9.081	6.277	0.846	5.799	16.303	186.409	7.496	1348.12	137.799	806.693	1590.88	4911.07
006	05/12/16	4	2491.97	16.357	39.015	44.628	104.26	248.686	126.429	32.401	35.184	36.633	11.69	0.776	10.585	305.239	0.398	1.162	33.314	15.65	3.13	8.201	107.951	137.352	6.069	855.066	156.834	614.573	2745.51	3272.2
006	05/13/16	4	3608.77	18.131	43.311	35.083	164.605	393.205	141.558	28.081	48.304	17.571	7.222	0.309	5.072	405.673	0.562	1.686	12.367	4.31	0.947	3.744	22.73	51.512	2.472	1128.61	216.88	919.234	3194.43	5659.38
006	05/14/16	4	1441.39	18.288	43.838	37.874	69.789	167.289	64.235	26.739	16.584	28.41	7.924	0.544	7.273	208.997	0.268	0.872	6.102	4.156	0.824	1.799	50.386	20.504	4.59	842.751	85.892	541.205	1647.15	3074.36
006	06/12/16	8	2348.56	18.945	36.454	44.601	111.449	214.449	116.613	23.24	53.276	23.107	3.041	0.208	2.703	378.55	0.422	1.274	11.852	4.239	1.359	5.242	18.436	95.385	2.767	803.629	110.085	545.976	1860.46	5204.45
006	06/13/16	8	1856.64	27.727	27.642	44.631	131.117	130.716	93.802	16.332	41.114	17.373	9.3	0.185	2.755	316.509	0.31	1.529	8.299	3.599	0.9	6.232	6.632	74.043	1.498	625.193	84.479	872.013	1273.98	2830.57
006	06/14/16	8	2237.25	13.562	36.347	50.091	76.228	204.305	125.136	13.771	53.605	28.965	9.621	0.268	2.78	366.442	0.398	1.321	6.063	4.072	0.454	1.978	19.759	33.425	1.532	575.534	59.379	388.004	998.632	2840.05
007	03/27/16	-1	1824.37	15.451	50.131	34.419	71.416	231.711	70.706	13.43	31.153	6.12	2.058	0.107	1.548	80.548	0.663	0.482	5.865	0.811	0.298	0.14	16.992	8.541	0.641	596.321	85.507	284.543	622.616	2670.02
007	03/28/16	-1	1572.35	12.249	54.871	32.88	49.132	220.097	58.615	19.939	20.867	2.034	1.016	0.038	0.73	0	1.31	0.245	5.708	1.031	0.528	0.006	72.9	0	0.232	274.469	131.576	312.584	842.011	1559.79
007	03/29/16	-1	1682.19	17.735	44.159	38.107	74.495	185.49	71.141	6.858	25.286	13.496	3.309	0.06	0.499	105.933	0.711	0.341	9.929	1.102	0.749	0.578	127.085	7.69	0.778	556.617	62.783	355.335	1166.96	2888.85
007	04/04/16	0	766.237	20.629	47.311	32.06	40.492	92.863	27.968	10.108	11.85	7.461	2.367	0.383	0.404	22.113	1.048	0.294	8.642	2.362	0.812	2.773	18.1	357.204	1.173	236.172	95.732	368.382	1081.24	1591.66
007	04/05/16	0	2020.71	12.199	47.906	39.895	62.04	243.625	90.171	10.89	30.125	22.798	8.952	0.519	6.404	218.34	0.964	0.749	10.668	1.367	0.867	1.219	16.559	147.578	0.17	138.779	71.546	383.217	1038.61	2924.93
007	04/03/16	0	1904.8	12.954	53.158	33.889	61.601	252.789	71.625	13.525	25.142	5.457	2.606	0.114	1.753	138.6	1.45	0.996	6.245	2.975	0.558	0.972	108	2.25	0.901	281.512	110.617	549.596	1358.17	2409.74
007	05/02/16	4	1052.24	18.946	39.424	41.629	51.494	107.151	50.286	16.804	11.978	3.487	3.809	1.366	0.846	91.438	0.633	0.765	10.741	2.693	0.995	1.813	27.943	190.389	0.491	448.632	108.63	371.555	1198.44	1209.37
007	05/03/16	4	2207.68	7.066	65.415	27.518	39.436	365.068	68.254	14.323	20.04	1.423	1.372	0.007	0.082	31.35	0.327	0.895	3.8	2.899	0.176	0.108	75.656	8.553	0.104	708.623	51.328	381.447	959.409	1749.54
007	05/01/16	4	1385.42	18.077	51.607	30.316	63.244	180.549	47.139	10.583	16.742	2.54	1.056	0.015	1.041	0.156	0.319	0.087	2.467	0.056	0.013	0.044	63.6	0	0.774	476.852	9.987	23.718	383.508	1711.15
007	05/29/16	8	2887.13	16.12	40.481	43.4	117.674	295.506	140.807	11.374	57.718	30.135	8.917	0.621	7.452	801.301	1.117	1.506	21.361	5.866	2.092	2.299	146.221	71.177	1.136	1202.79	191.334	908.732	1947.51	3459.2
007	05/30/16	8	1447.09	19.75	38.134	42.116	71.287	137.645	67.565	9.416	20.765	0.704	1.626	0.01	0.106	1.701	0.306	0.253	4.547	0.333	0.242	1.596	10.8	92.268	0	581.763	57.962	126.071	316.973	2545.42
007	05/31/16	8	1107.9	23.458	42.264	34.277	64.36	115.957	41.797	6.248	16.121	4.403	2.805	0.15	2.247	96.313	0.506	0.897	4.814	2.227	0.237	0.418	8.608	23.354	0.802	534.928	66.002	249.704	592.019	2752.09
008	03/29/16	-1	776.266	6.165	81.326	12.508	12.44	164.098	11.217	12.563	1.778	5.579	2.598	0.177	1.279	486.96	0.748	0.816	10.34	1.295	1.573	0.006	318.875	0	2.72	102.012	134.219	309.39	1270.66	820.722
008	03/27/16	-1	1729.01	11.243	53.241	35.516	49.151	232.744	69.003	16.21	22.99	1.144	0.276	0.016	0.208	48.28	0.268	0.142	1.584	0.552	0.193	0.309	93.384	2.8	0.289	149.293	27.089	101.357	828.035	3742.09
008	03/28/16	-1	1115.74	10.385	51.164	38.451	28.977	142.762	47.683	10.31	9.08	2.895	1.586	0.095	1.414	22.963	0.056	0.101	10.81	0.796	0.476	0.272	86.786	6.804	0	100.861	51.376	0	630.786	592.272
008	04/05/16	0	424.341	11.205	65.735	23.061	12.396	72.724	11.339	11.306	2.351	3.938	2.472	0.033	2.443	6.36	0.233	0.134	4.779	0.309	0.153	0	9.752	0	1.388	99.909	36.162	74.285	345.865	379.766
008	04/03/16	0	1363.86	18.506	52.157	29.337	63.236	178.222	44.553	8.998	16.366	8.843	4.947	0.29	4.512	268.083	0.622	0.744	15.614	2.376	0.758	0.896	6.067	78.804	1.058	561.759	76.446	307.937	661.599	1763.82
008	04/04/16	0	1150.65	22.252	44.482	33.266	63.635	127.208	42.281	8.134	20.875	6.135	4.442	0.205	4.158	38.143	0.203	0.211	11.7	1.017	0.538	0.682	0.921	21.588	0.665	58.031	55.363	190.08	453.705	1344.92
008	05/05/16	4	2553.31	16.137	32.391	51.472	101.443	203.625	143.813	10.774	70.857	22.786	6.681	1.182	3.6	1699.07	1.091	1.481	9.574	4.531	1.224	1.804	27.992	219.627	6.25	789.532	170.25	837.987	2698.31	4323.76
008	05/06/16	4	2546.57	6.772	40.699	45.187	43.875	263.69	130.119	12.36	24.152	5.822	3.927	0.145	1.34	241.906	0.686	0.597	8.341	3.042	1.166	0.198	314.864	155.72	2.674	763.976	103.968	317.379	1014.78	3799.67
008	05/07/16	4	1049.68	13.196	54.616	32.188	34.792	144	37.718	10.204	8.299	1.743	0.48	0.023	0.456	0	0.366	0.438	5.047	0.137	0.432	1.2	45.6	0	0.31	241.995	21.396	227.377	194.011	2042.95
008	06/04/16	8	1737.55	14.781	65.542	19.677	63.293	280.652	37.449	13.526	16.606	5.557	2.013	0.101	1.786	15.05	4.202	5.713	15.465	4.653	1.341	0	14.428	100	1.022	760.305	83.632	285.05	810.431	3408.07
008	06/02/16	8	1180.34	10.891	63.936	25.173	33.51	196.715	34.422	18.307	10.353	9.833	3.633	0.068	1.826	81.636	0.708	0.393	8.263	2.776	1.008	0.097	19.628	0	1.092	183.568	212.583	584.633	1421.89	1488.17
008	06/03/16	8	947.36	20.729	40.994	38.277	49.605	98.097	40.709	7.822	14.503	12.754	5.521	0.28	4.15	554.571	0.939	1.294	9.207	3.24	0.794	2.118	21.762	83.688	2.661	361.906	99.645	602.466	1213.93	2550.26
012	03/29/16	-1	1070	19.871	29.623	50.506	54	80.5	61	8.5	17.25	5	12	0	0	0	0	0	0	0	0	0	0	0	0	5.04	0	0	510	2105
012	03/28/16	-1	1070	19.871	29.623	50.506	54	80.5	61	8.5	17.25	5	12	0	0	0	0	0	0	0	0	0	0	0	0	5.04	0	0	510	2105
012	03/27/16	-1	2375.99	13.859	27.858	58.283	86.228	173.325	161.163	20.422	37.852	47.427	16.605	0.114	1.748	139.969	0.326	0.636	6.488	2.74	0.512	0.972	3.949	0	0.854	267.143	317.164	741.189	920.296	3496.23
012	04/03/16	0	1474.51	11.335	43.404	45.26	43.676	167.244	77.509	6.92	22.671	6.896	2.238	0.146	2.093	148.68	0.101	0.45	0.264	1.359	0.116	1.207	0.75	0	0.997	93.8	24.64	202.3	199.92	2778.73
012	04/04/16	0	1815.1	13.098	45.121	41.782	60.08	206.97	85.18	14.84	19.996	8.71	13.655	0.022	1.634	0.9	0.051	0.054	1.281	0.175	0.026	0.012	0	0	0.66	15.54	13.5	25.8	560.1	2641.5
012	04/05/16	0	1672	19.678	34.202	46.12	84	146	87.5	9	31.5	0	0	0	0	0	0	0	0	0	0	0	13	0	0	460	0	0	0	4190
012	05/01/16	4	2251.92	19.037	35.013	45.95	110.54	203.31	118.586	15.5	38.2	5.838	2.448	0.152	2.294	182.16	0.07	0.476	0.07	1.434	0.142	1.278	13	0	1.122	154.28	11.96	191.36	705.24	4847.68
012	05/02/16	4	1816	16.632	37.381	45.987	76.58	172.12	94.11	13.5	22.016	4.076	1.414	0.08	1.338	169	0.066	0.514	0.064	1.398	0.122	1.11	10.7	52	1.03	90	10	199	684	3373.5
012	05/03/16	4	2000.05	13.229	37.636	49.135	67.534	192.135	111.482	19.15	35.985	10.118	1.71	0.082	1.628	33	0.045	0.326	0.557	0.323	0.038	0.248	0.15	20.567	3.368	168	67.5	234	897	3104
012	05/29/16	8	1422.94	16.302	32.981	50.717	57.823	116.983	79.952	8.989	25.876	10.276	4.144	0.171	2.939	225.86	0.537	0.992	5.877	1.91	0.338	2.202	23.875	59.288	1.808	455.939	47.465	381.26	541.15	2843.09
012	05/30/16	8	1647.28	10.971	52.57	36.459	46.675	223.651	68.936	14.879	24.132	7.111	1.383	0.033	0.348	0	0.286	0.137	2.339	0.156	0.05	0	53.4	0	0.085	279.794	25.185	75.555	453.373	2971.4
012	05/31/16	8	1606	13.425	53.936	32.639	54.858	220.404	59.279	12.69	21.951	10.405	2.005	0	0	92.496	0.443	0.898	4.503	1.95	0.267	2.145	36.743	36.907	0.424	679.719	67.45	453.93	1279.02	2645.98
014	03/27/16	-1	1261.87	21.311	47.578	22.092	67.364	150.392	31.036	6.748	16.093	5.583	2.664	0.12	1.089	213.369	2.325	1.793	13.913	3.428	1.691	0.986	73.46	144.463	2.608	720.386	129.963	1060.74	1790.72	3839.04
014	03/28/16	-1	851.678	9.411	34.977	55.612	20.306	75.473	53.333	6.241	26.16	10.747	1.805	0.628	1.052	642.001	0.233	0.671	2.029	1.969	0.302	0.401	24.37	88.341	1.903	460.014	121.904	355.086	1352.88	853.535
014	03/29/16	-1	912.058	17.326	52.272	30.403	39.732	119.871	30.987	5.532	11.795	6.602	4.794	0.288	2.672	32.329	0.857	1	9.785	1.153	0.282	0.911	1.575	12.257	0.611	540.313	71.908	452.268	551.658	2083.37
014	04/03/16	0	1534.06	12.293	49.579	38.128	47.551	191.78	65.549	10.191	37.477	4.958	3.063	0.16	1.073	102.101	1.383	1.203	9.298	1.946	0.985	0.34	25.656	137.659	0.801	891.02	93.872	317.777	1145.86	2368.79
014	04/04/16	0	1511.77	12.564	53.466	33.97	48.196	205.096	57.915	10.394	22.384	10.268	5.144	0.288	4.834	74.88	0.565	0.738	1.815	0.678	0.237	0.024	34.488	100	3.556	626.49	17.879	67.403	178.332	3387.32
014	04/05/16	0	1292.88	16.456	64.499	19.045	53.579	209.996	27.558	13.786	10.559	1.38	1.295	0.123	1.161	14.991	1.361	1.146	8.228	0.909	0.304	0.282	24	103.498	0.287	658.677	81.801	328.98	171.967	1840.1
014	05/05/16	4	1849.03	18.897	41.189	39.913	88.912	193.798	83.464	17.155	29.677	32.49	5.182	0.496	3.598	71.98	1.492	1.164	28.345	3.177	1.443	4.87	4.54	34.755	3.686	252.641	302.071	947.99	1837.41	2400.69
014	05/06/16	4	847.929	17.171	42.096	26.265	37.306	91.457	25.361	2.625	10.817	0.035	0.002	0	0.002	0	0.042	0.293	4.684	0.601	0.311	0.091	11.075	127.083	0.024	530.18	38.85	97.816	388.094	1156.46
014	05/07/16	4	894.291	22.359	54.465	23.176	49.795	121.295	22.939	1.9	6.908	5.942	3.719	0	0	35.68	1.225	0.803	15.997	1.021	0.408	1.746	6.923	7.257	0	139.058	54.431	331.122	582.866	4582.77
014	06/05/16	8	2156.57	12.623	46.251	41.126	69.054	253.008	99.987	18.509	48.948	7.245	3.603	0.294	3.297	212.301	0.39	0.898	3.469	2.286	0.156	1.016	14.441	6.03	1.276	374.305	39.04	233.913	390.013	3855.67
014	06/06/16	8	2350.24	12.488	42.432	45.08	73.766	250.648	118.35	12.117	60.482	11.333	4.377	0.349	4.016	340.298	0.369	0.848	3.213	1.802	0.16	0.815	25.883	49.642	1.662	896.035	37.338	251.55	350.631	3999.21
014	06/07/16	8	568.017	9.13	47.474	43.396	13.169	68.476	27.82	3.455	9.222	5.986	9.503	1.069	8.433	64.657	0.543	0.422	5.351	0.439	0.092	0.03	0	5.294	1.949	212.183	41.255	144.714	145.315	710.432
015	03/28/16	-1	2154.57	17.403	31.153	51.444	96.286	172.364	126.5	16.078	41.301	27.837	8.07	0.341	5.885	770.819	0.78	1.921	29.838	7.892	2.022	8.15	107.168	90.688	8.398	840.295	248.288	846.142	2026.86	2781.53
015	03/29/16	-1	2758.4	23.262	39.633	37.105	162.322	276.562	115.076	42.535	44.913	20.296	10.401	0.556	8.377	1861.13	1.109	1.665	13.836	3.003	3.331	0.266	672.77	0.747	20.795	1670.78	515.002	840.687	4339.24	5172.65
015	03/27/16	-1	1833.22	14.922	43.408	38.236	69.87	203.245	79.568	15.347	22.039	11.765	3.724	0.262	1.113	2404	1.317	2.13	19.457	11.331	2.843	6.999	131.489	142.072	2.831	1157.72	272.065	1612.14	3743.97	3566.8
015	04/04/16	0	1824.99	16.368	40.237	43.395	76.943	189.153	90.666	28.923	27.399	13.022	5.326	0.157	0.269	1171.59	0.831	0.901	4.38	2.18	0.641	0.686	141.591	0	8.792	1097.98	374.52	753.965	1696.91	1726.02
015	04/05/16	0	1885.74	27.34	42.633	30.028	133.117	207.577	64.979	30.141	17.916	20.208	8.801	0.308	3.486	2209.99	0.98	1.313	21.681	4.524	1.966	2.71	113.421	22.621	10.985	718.202	406.531	1097.01	2637.55	5106.81
015	04/03/16	0	1628.74	24.027	34.868	41.105	102.178	148.282	77.692	19.649	25.141	12.262	7.096	0.395	4.551	363.134	0.515	1.244	21.945	7.714	1.879	4.607	79.259	68.267	3.416	636.108	138.504	704.486	1195.85	3977.06
015	05/05/16	4	1478.33	22.591	47.364	30.045	86.177	180.676	50.939	18.893	14.248	2.818	1.204	0.131	0.978	193.262	0.793	1.12	9.638	2.698	1.113	1.524	210.879	27.634	1.943	415.295	129.045	334.95	2448.31	3084.68
015	05/06/16	4	2224.33	18.143	45.315	36.542	93.79	234.254	83.956	17.744	30.608	15.57	5.267	0.294	0.599	339.06	0.88	1.656	13.908	3.601	1.528	3.372	55.673	18.722	1.206	1233.73	198.123	1076.81	2625.02	3217.67
015	05/07/16	4	1737.53	25.364	42.612	32.024	109.896	184.63	61.667	16.868	21.377	12.544	4.737	0.221	2.372	1709.8	0.776	1.749	26.115	4.827	2.276	4.829	97.268	87.062	2.376	659.099	192.486	1237.57	3239.54	2567.01
015	06/07/16	8	2675.79	14.063	36.524	49.413	97.303	252.715	151.955	20.071	80.224	13.974	3.343	0.229	0.395	497.143	0.882	0.936	13.637	1.986	0.982	2.573	122.115	30.598	0.721	787.875	123.45	333.078	1642.86	3765.93
015	06/05/16	8	1885.1	25.567	40.167	34.266	121.741	191.259	72.515	20.552	24.948	11.785	4.428	0.357	3.845	289.153	1.258	1.568	38.315	4.195	2.451	4.587	85.635	82.375	2.127	413.41	223.361	714.056	2569.86	1694.37
015	06/06/16	8	1412.02	24.45	34.802	40.748	87.088	123.96	64.506	18.541	19.437	15.563	17.704	1.304	13.357	331.86	0.508	1.049	8.922	2.117	0.8	3.358	32.809	186.325	4.429	865.801	225.168	607.973	1941.77	3043.46
017	03/29/16	-1	1790.05	16.762	44.871	38.367	76.178	203.929	77.497	16.929	28.771	11.947	12.965	0.36	1.561	135.42	0.775	1.144	16.745	2.174	1.236	3.797	15.818	9.6	1.03	1091.16	94.868	993.542	568.955	3407.84
017	03/27/16	-1	1684.52	22.027	42.274	35.699	94.196	180.781	67.849	9.583	24.294	16.152	11.392	0.702	3.69	3.54	1.761	0.892	13.685	1.529	1.015	1.306	10.266	54	0.437	181.82	83.26	286.06	1153.04	4198.58
017	03/28/16	-1	1145.15	19.896	52.633	27.471	57.209	151.337	35.106	7.062	7.881	3.238	6.992	0.103	0.888	9.995	0.594	0.396	15.326	0.728	0.829	2.551	10.266	0	0.37	151.533	62.467	300.892	545.307	4497.36
017	04/03/16	0	1660.36	21.303	35.543	43.154	89.909	150.011	80.947	16.064	21.738	18.808	17.278	0.409	4.851	151.024	0.753	1.078	18.153	3.408	1.327	3.162	24.432	33.024	3.245	608.398	112.464	588.162	1311.76	2796.63
017	04/04/16	0	1407.4	32.448	35.66	31.893	115.114	126.509	50.287	14.944	18.167	1.765	1.52	0.337	1.181	180.549	0.622	0.533	4.916	1.453	0.567	0.118	154.302	2.24	3.031	830.874	66.515	245.973	823.737	2959.56
017	04/05/16	0	1514.79	20.595	37.535	41.87	79.428	144.76	71.768	11.858	25.296	4.686	2.674	0.37	2.304	315	0.417	0.743	3.263	2.453	0.492	0.994	134.82	0	3.64	572.48	58.87	342.01	704.97	2756.08
017	05/03/16	4	1125.81	15.891	44.236	39.873	45.33	126.185	50.551	5.436	23.015	11.391	6.67	0.118	1.332	136.488	0.729	0.827	9.054	1.663	0.428	0.684	24.655	33.288	0.539	678.279	66.517	374.888	1025.14	3106.68
017	05/01/16	4	1510.14	24.367	57.235	18.398	99.335	233.323	33.333	25.124	11.638	4.252	2.004	0.478	1.528	382.017	0.694	1.408	7.685	5.109	1.712	2.184	584.591	52	6.755	640.532	172.398	793.512	2663.57	3339.44
017	05/02/16	4	1856.08	24.249	44.422	31.328	112.208	205.555	64.429	17.598	26.416	9.338	5.743	0.625	4.885	113.984	0.911	1.148	46.015	3.899	2.064	4.323	26.996	58.346	0.958	871.452	170.77	713.791	2302.69	1581.8
017	05/31/16	8	1710.72	18.693	42.539	38.769	82.817	188.464	76.338	8.355	33.241	4.48	2.381	0.17	2.214	169	0.473	0.787	3.769	1.721	0.176	1.133	0.6	52	1.282	810.52	29.79	369.47	234.67	3407.69
017	05/29/16	8	2656.84	17.683	37.98	44.337	117.301	251.937	130.715	7.419	71.226	8.387	2.774	0.183	2.606	169	0.66	0.977	6.67	2.132	0.235	1.133	1.8	52	1.657	1825.59	56.89	431.218	302.61	4002.22
017	05/30/16	8	1305.9	20.768	47.053	32.179	69.438	157.322	47.818	8.837	18.679	10.194	3.37	0.169	1.708	266.14	0.513	0.796	18.298	3.102	1.093	0.86	157.651	41.288	1.498	502.1	87.87	278.25	1350.59	1914.03
018	03/27/16	-1	3161.34	22.145	19.383	58.472	178.669	156.383	209.669	20.7	69.185	74.917	30.515	0.396	29.995	177.462	1.123	2.174	44.729	5.735	1.774	9.874	5.172	145.156	12.3	586.558	431.834	1514.27	2906.71	1895.32
018	03/28/16	-1	2328.95	14.281	48.399	37.319	83.161	281.828	96.583	14.697	30.7	2.712	2.377	0.145	2.05	75.828	0.486	0.547	6.209	1.159	0.486	0.006	18.033	0	0.395	520.544	85.915	161.838	654.185	5120.12
018	03/29/16	-1	2140.63	13.425	59.22	17.518	70.933	312.892	41.138	16.134	9.338	5.388	4.862	0.274	0.661	28.595	0.2	0.327	10.605	2.314	0.932	1.684	9.6	11.6	0	192.357	178.722	593.888	765.087	2656.36
018	04/03/16	0	2360	15.444	46.332	38.224	92	276	101.2	4	38	0	0	0	0	0	0	0	0	0	0	0	0	0	0	20.034	10.016	0	0	4848.03
018	04/04/16	0	1740.43	12.908	38.774	48.318	61.139	183.653	101.713	18.212	25.915	8.36	4.344	0.264	4.071	143.13	0.472	0.67	5.706	2.001	0.479	1.156	59.335	3.2	1.33	247.565	123.65	486.66	592.295	3176.8
018	04/05/16	0	2603.42	13.465	42.3	36.425	90.009	282.749	108.214	17.9	21.429	0	0	0	0	0	0.037	0.189	3.864	0.308	0.348	0.15	13.2	0	0	299.477	62.726	132.462	221.391	3928.76
018	05/03/16	4	2979.34	14.57	34.813	40.895	113.746	271.776	141.89	22.931	39.1	26.394	8.654	0.928	5.923	594.305	2.015	0.938	15.599	2.794	1.818	2.801	52.649	122.379	0.735	645.307	223.942	805.194	2447.27	5788.56
018	05/04/16	4	2592.73	16.973	45.712	37.315	108.754	292.902	106.266	13.276	19.925	17.753	6.159	0.421	5.494	510.287	1.357	0.685	9.007	2.155	0.81	1.177	6.383	37.822	0.823	396.423	106.802	511.573	1115.34	3644
018	05/05/16	4	746.061	24.078	52.412	23.51	44.779	97.472	19.433	3.115	5.583	2.017	0.768	0.149	0.614	223.063	0.311	0.545	2.756	0.885	0.288	0.879	31.292	2.8	1.626	373.44	64.286	296.275	674.753	471.071
018	05/29/16	8	1158.09	22.818	52.333	24.849	67.134	153.97	32.493	11.563	9.316	9.95	3.894	0.071	0.369	1823.41	0.715	1.103	6.323	2.413	0.921	1.221	46.777	33.288	3.369	476.845	142.182	531.389	1740.26	1276.91
018	05/30/16	8	1143.12	11.661	54.774	33.565	34.48	161.966	44.111	25.483	11.92	16.204	9.744	0.077	7.617	1609.69	0.684	0.36	14.212	1.322	0.67	0.018	15.095	5.6	4.94	289.965	147.884	344.731	1307.57	1282.17
018	05/31/16	8	1102.31	7.831	52.478	39.691	22.634	151.685	50.989	27.14	10.194	21.656	5.033	0.253	3.512	784.717	0.446	0.409	5.223	3.283	0.754	0	107.648	0	5.005	92.598	104.539	277.928	1971.88	1077.48
019	04/03/16	-1	2889.04	16.32	38.748	44.932	122.433	290.696	149.818	37.355	29.76	61.38	40.691	0.419	35.647	156.454	1.397	1.656	50.275	6.772	2.477	3.731	35.615	201.414	10.734	739.138	584.568	1265.78	4630.48	2406.91
019	04/04/16	-1	2032.38	11.767	61.025	27.208	58.923	305.567	60.549	18.034	25.585	8.372	2.858	0.153	2.163	573.54	0.669	1.177	8.671	4.191	0.525	0.126	117.87	6.624	1.085	1032.02	118.744	361.411	1248.37	3908.28
019	04/05/16	-1	1991.55	11.192	63.116	25.692	57.506	324.3	58.672	28.779	23.118	20.692	9.701	0.598	8.705	690.244	1.394	2.194	22.326	8.066	2.698	1.402	133.438	105.264	4.045	456.479	326.842	945.491	4303.46	1982.02
019	04/12/16	0	2476.72	12.499	55.917	31.583	78.964	353.253	88.678	32.875	28.05	11.049	7.627	0.253	2.977	622.147	0.96	1.773	11.851	2.734	0.856	4.491	131.447	192.476	3.072	1055.91	239.202	642.408	2046.4	4064.13
019	04/11/16	0	2102.39	10.107	50.608	39.285	54.907	274.937	94.855	34.9	25.353	28.095	18.35	0.595	11.522	138.482	0.563	0.815	8.588	2.796	0.566	0.134	13.094	10.016	3.863	427.512	198.374	643.684	1615.31	3738.27
019	04/10/16	0	1639.28	11.047	35.183	53.769	47.915	152.6	103.649	22.331	29.358	41.112	23.689	0.663	22.897	897.838	1.206	1.783	7.687	5.164	0.797	1.411	131.145	60.832	7.246	423.858	470.258	1191.63	2057.61	1697.1
019	05/09/16	4	2420.31	11.329	43.685	44.986	70.283	271.008	124.037	27.071	32.667	9.836	4.028	0.209	3.087	1541.77	0.548	0.96	5.852	3.785	0.692	0.176	38.384	58.202	2.786	409.842	128.189	369.757	1232.64	2809.08
019	05/10/16	4	2785.89	9.993	54.018	35.989	72.706	393.009	116.375	34.973	14.477	32.751	5.434	0.038	0.811	40.182	1.57	0.707	10.425	2.221	0.802	0.068	0.86	3.268	0.279	213.136	245.647	552.214	1114.05	4429.42
019	05/08/16	4	2666.35	14.374	40.991	44.635	95.697	272.9	132.071	20.128	38.614	11.561	8.297	0.07	0.506	783.892	1.343	0.788	19.062	1.969	0.937	2.444	97.135	29.257	1.588	703.784	97.982	581.463	1705.24	4762.11
019	06/09/16	8	1130.98	11.766	73.376	14.858	34.04	212.286	19.105	15.854	5.981	3.46	2.761	0.15	1.416	498.966	0.763	0.899	8.387	4.074	1.172	0.205	69.914	62.035	1.651	326.251	206.029	528.385	2097.16	2117.13
019	06/10/16	8	2746.65	12.606	51.468	35.927	88.274	360.415	111.816	15.827	38.863	17.337	7.961	0.237	1.564	282.722	0.712	1.045	6.161	2.874	0.544	0.317	18.379	39.468	1.321	547.413	81.247	181.464	1046.77	3517.41
019	06/11/16	8	3838.8	18.054	37.33	44.616	179.679	371.513	197.347	21.013	60.876	32.75	18.759	1.083	12.475	710.195	0.935	2.262	38.425	7.086	2.94	3.671	38.372	191.763	5.444	762.167	244.886	1412.48	3187.28	6065.45
020	03/29/16	-1	1657.19	17.356	47.194	35.45	74.483	202.53	67.615	19.651	31.727	18.744	6.854	0.465	5.336	298.375	2.183	1.065	17.698	3.841	1.036	0.924	11.639	140.918	2.362	1018.77	121.398	559.492	1048.68	2366.75
020	03/27/16	-1	2698.16	18.5	38.082	43.418	124.561	256.405	129.928	8.956	52.209	36.524	16.339	0.78	11.428	489.015	1.554	2.262	32	4.479	1.917	4.559	34.009	198.303	2.883	1252.07	212.716	994.831	1826.75	3227.04
020	03/28/16	-1	2339.6	14.891	38.452	46.657	87.952	227.115	122.481	12.136	38.607	47.916	20.512	0.526	12.819	735.462	1.172	1.55	25.415	1.646	1.351	1.327	20.425	65.731	6.537	1429.5	243.124	1323.15	2172.76	4537.97
020	04/05/16	0	2182.73	14.578	48.013	37.41	79.636	262.29	90.83	11.319	52.087	12.338	2.282	0.415	1.862	672.9	1.122	0.708	8.035	1.162	0.331	0.343	19.809	141.621	2.467	1438.74	82.757	274.29	555.355	2841.25
020	04/03/16	0	2142.81	13.352	40.18	46.468	71.396	214.847	110.43	15.333	47.193	17.893	7.575	0.198	7.295	327.043	0.549	1.102	9.247	3.034	0.28	0.857	1.717	48.3	3.35	806.539	88.786	351.124	791.963	3739.62
020	04/04/16	0	2245.95	15.711	50.996	33.293	89.563	290.713	84.351	15.069	28.655	2.261	1.306	0.201	1.07	231.709	0.596	0.435	16.939	1.548	0.91	0.343	153.133	13.509	0.626	613.267	90.139	139.716	1456.85	3967.89
020	05/05/16	4	1539.52	15.889	45.265	38.846	62.678	178.562	68.107	8.143	25.767	19.766	6.948	0.332	3.615	346.014	1.699	1.02	14.375	2.758	0.573	1.195	8.212	192.344	1.439	1157.03	106.59	568.475	730.508	3265.65
020	05/06/16	4	2852.88	15.373	47.595	37.032	110.901	343.347	118.733	14.353	41.768	15.597	6.423	0.376	5.773	185.982	1.574	1.258	15.437	3.156	1.01	2.292	7.506	147.955	2.493	1388.47	119.525	687.676	963.247	4222.98
020	05/07/16	4	1715.87	12.087	53.32	34.592	52.1	229.823	66.267	8.461	23.931	17.894	6.118	0.206	4.528	90.723	1.444	0.509	9.076	1.603	0.383	0.233	3.776	102.8	2.015	822.135	125.155	396.195	582.17	2843.92
020	06/07/16	8	1754.04	16.28	38.203	45.517	72.508	170.148	90.099	11.237	37.537	11.09	3.377	0.429	2.947	223.976	0.63	0.599	8.669	0.679	0.138	0.282	4.436	10.57	0.748	477.507	58.756	287.308	405.944	2624.97
020	06/05/16	8	3290.48	11.582	49.427	38.991	95.893	409.22	143.474	13.79	55.183	2.394	0.924	0.107	0.81	33.164	0.941	0.317	9.716	0.487	0.62	1.238	16.945	109.407	0.444	1140.95	24.096	222.331	336.701	5497.09
020	06/06/16	8	2813.14	11.506	52.441	36.052	80.834	368.402	112.564	13.738	35.172	0.008	0.073	0.001	0.004	553.982	1.116	0.045	3.068	1.287	0.424	0	12.03	175	0.012	888.706	42.235	136.25	310.474	4391.35
021	03/29/16	-1	2388.19	17.334	52.958	18.996	106.177	324.387	51.715	20.675	19.024	4.214	3.123	0.081	0.995	128.222	0.975	1.876	13.658	3.363	1.387	0.617	211.446	29.268	0.985	647.649	115.335	444.548	1870.82	4970.13
021	03/27/16	-1	3551.02	10.279	45.034	44.687	94.888	415.72	183.339	10.416	84.014	17.942	4.248	0.127	2.1	500.984	2.233	1.671	21.169	4.408	1.273	2.142	96.387	52.292	1.266	1458.59	131.344	832.625	2661.36	6627.41
021	03/28/16	-1	1858.55	17.803	61.017	21.181	85.657	293.58	45.293	24.268	16.027	9.711	5.079	0.187	2.8	550.523	1.453	2.18	23.128	5.365	2.052	2.368	69.734	38.542	3.015	850.547	252.89	955.339	2248.29	1927.11
021	04/03/16	0	1352.07	22.042	38.753	39.205	77.934	137.022	61.609	20.797	19.01	16.128	11.15	0.169	0.704	602.235	0.584	1.297	8.952	3.113	1.423	4.09	78.935	105.68	1.012	812.118	156.935	577.871	1895.56	3035.91
021	04/04/16	0	2336.4	14.129	47.986	32.46	83.757	284.457	85.52	22.33	33.006	6.552	3.726	0.193	1.39	913.99	1.185	1.853	14.478	3.665	1.903	0.766	47.233	40.265	1.923	1233.56	188.073	957.178	2434.98	4389.58
021	04/05/16	0	1429.97	17.67	59.86	22.47	65.198	220.867	36.848	22.919	11.139	14.946	2.426	0.175	1.1	960.377	0.496	1.216	6.749	4.161	1.282	0.64	110.647	36.084	4.125	259.245	199.591	694.619	2871.64	3721.63
021	05/01/16	4	2042	23.609	34.065	39.402	119.222	172.023	88.433	23.868	27.278	24.581	6.514	0.769	6.265	186.056	2.609	2.252	24.708	6.853	1.872	9.005	22.874	160.858	3.388	452.682	291.514	1315.4	2805.4	4303.47
021	05/02/16	4	3134.37	18.329	49.989	31.682	145.874	397.844	112.064	42.887	29.791	20.329	4.454	0.662	3.235	389.129	1.65	1.919	38.656	15.106	3.671	12.446	88.135	144.511	4.931	783.59	475.837	1136.64	3451.6	4335.33
021	05/03/16	4	2247.28	10.388	55.426	34.186	59.127	315.494	86.485	25.469	26.908	7.606	1.992	0.139	1.796	107.809	0.697	1.011	10.431	3.605	1.343	0.084	38.301	104.416	4.758	796.896	230.637	443.247	1639.31	1976.38
021	05/29/16	8	1798.26	14.666	43.677	41.657	67.18	200.067	84.808	12.386	29.159	21.076	6.985	0.489	4.323	506.174	1.271	1.54	15.002	4.62	1.19	3.188	99.335	72.07	3.4	819.243	167.823	612.785	2509	2065.32
021	05/30/16	8	1506.2	17.643	52.081	30.276	66.485	196.258	50.705	23.507	15.42	15.506	8.8	0.087	0.896	202.111	1.187	2.038	18.168	3.887	1.123	4.622	13.117	188.186	0.701	1061.65	277.132	1071.66	1951.62	2835.26
021	05/31/16	8	1723.46	14.205	46.035	35.478	63.095	204.479	70.039	23.744	18.539	9.886	8.207	0.045	2.412	35.162	0.588	1.295	11.923	2.481	0.706	0.705	13.721	56.142	1.195	1008.22	158.662	614.053	1654.58	2686.58
022	03/27/16	-1	1909.74	21.365	52.623	26.012	105.765	260.505	57.23	17.754	18.769	7.595	4.612	0.434	4.12	325.628	0.835	1.654	18.357	4.225	1.657	3.011	92.942	145.148	1.839	552.348	201.296	1025.08	2235.74	3036.01
022	03/28/16	-1	1945.96	19.555	50.576	29.869	95.884	247.987	65.091	15.312	22.102	11.985	7.357	0.707	4.623	1547.73	2.418	2.039	29.006	3.503	2.102	2.521	67.917	123.246	2.723	716.969	166.766	1057.47	2537.43	4988.62
022	03/29/16	-1	2117.05	13.927	49.464	36.609	74.613	265.009	87.172	11.329	37.231	18.638	14.165	0.403	4.098	556.394	1.421	2.405	15.212	5.553	1.209	4.172	84.966	262.622	1.948	1053.34	241.027	1007.11	2356.41	2370.67
022	04/03/16	0	1745.32	13.731	40.717	45.552	60.012	177.959	88.486	2.941	31.466	13.703	5.706	0.563	4.981	282.904	0.876	1.145	9.286	1.753	0.738	2.284	207.325	35.79	1.808	467.559	95.033	412.469	1382.41	2085.22
022	04/04/16	0	1862.45	12.954	52.573	34.473	61.628	250.116	72.89	11.679	17.797	9.789	8.554	0.238	1.79	318.736	1.316	2.029	21.571	2.649	1.397	2.664	85.142	203.728	0.768	948.119	144.048	640.811	1893.77	2519.1
022	04/05/16	0	1916.14	19.272	58.752	21.975	92.676	282.525	46.966	18.753	18.08	1.721	1.926	0.443	1.47	217.19	0.983	1.458	13.22	2.166	1.302	8.374	84.516	146.31	0.317	928.845	139.275	615.24	2226.94	3589.43
022	05/05/16	4	1701.26	10.009	60.848	29.143	43.626	265.217	56.454	12.733	19.346	5.22	2.554	0.295	2.255	301.629	0.979	0.933	6.159	1.379	0.175	1.398	118	109.525	0.772	642.741	66.372	404.247	1312.05	2386.97
022	05/07/16	4	1261.9	25.285	48.247	26.468	80.472	153.551	37.439	5.263	14.659	11.503	4.348	0.496	3.455	540.653	1.333	1.927	15.938	4.609	1.471	4.89	134.431	238.595	4.451	668.25	164.855	1077.33	2672.86	1373.36
022	05/06/16	4	1676.63	8.622	53.925	29.981	37.111	232.097	57.353	12.01	19.285	7.799	9.24	0.951	8.287	98.441	0.752	0.403	5.676	0.468	0.107	0.038	122.5	8.06	2.157	429.378	46.269	167.447	827.966	2729.18
022	05/29/16	8	2382.34	21.928	38.964	39.108	133.411	237.057	105.75	20.037	19.759	38.419	19.519	0.681	14.125	226.46	1.05	1.077	35.314	2.958	0.928	6.06	60	244.384	6.794	728.765	200.633	772.173	1506.18	4174.62
022	05/30/16	8	1686.65	19.349	52.509	28.141	82.185	223.028	53.123	10.129	18.059	5.091	2.144	0.238	1.849	240.231	0.809	1.089	11.218	2.1	1.056	3.901	100.624	217.547	0.677	1046.47	114.087	653.407	1791.46	2005.75
022	05/31/16	8	1226.52	21.332	38.711	32.276	66.987	121.56	45.047	9.626	15.97	8.215	3.538	0.326	3.21	34.2	0.517	0.309	4.653	0.583	0.121	0.767	113.5	7.96	0.615	617.776	31.891	193.455	557.381	2445.58
023	03/27/16	-1	1151.58	18.696	42.247	38.241	54.437	123.01	49.488	13.066	18.042	11.969	4.12	0.277	3.755	192.9	0.811	1.19	10.16	3.204	0.499	1.603	35.979	17.622	1.334	223.107	154.116	535.236	1260.64	2266
023	03/28/16	-1	515.291	11.332	52.998	35.67	15.045	70.363	21.048	6.226	9.901	4.902	1.454	0.075	1.289	124.544	0.366	0.582	4.248	2.033	0.181	0.108	2.15	10.016	0.539	99.319	99.088	267.358	554.656	693.675
023	03/29/16	-1	1385.27	11.795	51.914	36.291	41.291	181.742	56.466	6	18.374	7.389	1.719	0	0.989	125.7	0.789	1.15	10.062	1.88	0.527	1	6.9	17.702	0.59	289.587	66.54	293.435	540.247	2062.32
023	04/03/16	0	746.252	18.101	51.809	30.09	33.8	96.742	24.972	0.78	8.468	10.087	4.351	0.227	3.889	414.616	1.146	0.944	7.773	1.946	0.692	1.168	2.761	53.851	0.491	237.855	70.911	428.829	1045.84	1773.39
023	04/04/16	0	1530.64	11.698	53.771	34.531	45.057	207.104	59.111	14.616	25.203	8.41	4.144	0.068	0.503	61.08	0.943	0.979	10.51	1.876	0.952	0.502	33.452	10.576	0.255	502.317	98.707	250.912	910.116	1654.64
023	04/05/16	0	1575.67	10.743	50.188	39.068	42.496	198.527	68.685	14.37	21.42	20.223	9.986	0.087	0.214	81.935	0.677	1.007	7.294	2.386	0.941	0.924	71.729	10.576	0.387	677.537	113.367	403.521	1840.65	2325.69
023	05/05/16	4	1230.54	18.777	46.242	34.98	58.558	144.21	48.484	12.126	14.283	12.707	5.454	0.135	1.953	193.943	0.474	1.239	5.721	3.04	0.625	1.057	2.076	4.414	1.171	195.682	66.404	311.293	524.003	2335.7
023	05/06/16	4	1623.62	20.296	37.816	41.889	82.805	154.285	75.956	15.97	23.47	17.987	9.207	0.478	7.746	427.223	0.503	1.147	19.136	3.632	1.346	0.679	5.436	53.374	0.837	189.887	90.59	450.983	863.629	2553.69
023	05/07/16	4	1185.14	9.281	46.758	43.961	27.721	139.663	58.358	3.636	14.629	20.457	19.809	0.19	4.016	182.795	0.762	0.957	6.29	2.016	0.351	0.205	7.004	90.814	0.233	306.902	125.537	338.039	1041.92	1310.79
023	06/05/16	8	1248.29	12.79	50.209	37	40.184	157.75	51.666	7.358	18.179	10.421	5.016	0.111	1.111	118.997	0.93	1.33	9.987	2.365	0.396	2.126	11.191	20.143	0.621	748.145	88.192	480.17	1045.24	2601.29
023	06/06/16	8	1323.25	23.154	35.351	41.494	76.839	117.315	61.2	7.801	23.978	12.173	5.119	0.409	4.557	176.129	0.452	1.156	16.583	3.907	0.731	1.577	5.678	25.752	1.58	684.066	73.444	596.165	1371.08	2640.61
023	06/07/16	8	1013.85	14.788	45.81	39.401	39.768	123.192	47.092	9.348	12.212	7.171	1.392	0.06	1.266	71.46	0.291	1.104	7.131	2.519	0.163	1.076	1.511	12.336	0.059	410.577	67.04	324.738	789.753	1749.43
024	04/05/16	-1	1793.06	14.474	52.352	33.174	64.817	234.441	66.025	10.971	28.198	0.053	0.003	0	0.003	0	0.049	0.266	0.668	0.889	0.003	0	0	0	0.035	7	10.5	10.5	171.5	3563.32
024	04/04/16	-1	2074.09	15.194	42.677	42.129	80.548	226.237	99.259	21.943	45.498	4.687	2.618	0.118	2.03	461.104	0.914	0.87	7.313	2.505	0.588	0.298	64.651	20.248	0.616	1238.4	121.082	429.836	1192.87	4400.99
024	04/03/16	-1	2194.83	15.199	43.629	41.172	83.481	239.637	100.508	19.931	39.119	3.721	0.863	0.063	0.751	106.519	0.255	0.428	3.172	0.868	0.116	0.078	89.642	8.562	0.433	851.456	40.139	119.067	456.163	4225.55
024	04/11/16	0	2198.68	17.508	27.042	55.451	96.49	149.037	135.826	13.309	57.672	11.441	2.414	0.225	1.842	188.6	0.508	1.291	7.27	2.707	0.802	2.188	35.12	67.254	1.397	1194.89	77.417	593.832	1112.1	2260.18
024	04/12/16	0	2139.27	14.372	42.068	43.56	76.68	224.456	103.295	18.375	33.664	24.552	6.852	0.47	1.4	788.2	0.452	1.761	8.443	2.586	0.622	4.238	111.867	52	10.355	840.125	233.304	708.942	1292.45	2373.02
024	04/10/16	0	2013.69	21.35	37.841	31.232	109.694	194.423	71.317	14.602	31.385	9.326	3.827	0.102	1.533	105.64	1.4	1.494	15.29	3.385	0.893	1.839	5.286	59.197	1.129	787.745	115.21	612.365	952.72	4096.09
024	05/08/16	4	1833.62	16.424	43.614	39.962	75.89	201.526	82.067	7.213	38.481	9.754	8.112	0.257	3.42	105.64	0.424	0.65	6.303	2.043	0.979	2.03	42.393	70.944	0.84	801.044	66.626	358.142	620.345	2771.28
024	05/09/16	4	1829.67	13.661	42.469	43.871	64.308	199.923	91.788	20.1	23.586	6.321	2.278	0.028	2.252	577.559	0.803	0.582	5.312	1.114	0.217	0	41.882	6.25	0.881	546.633	86.203	176.422	871.682	3028.23
024	05/10/16	4	1490.97	19.878	37.617	42.505	76.324	144.434	72.534	13.279	21.129	0.555	0.796	0.045	0.751	0	0.193	0.25	2.327	0.78	0.118	0.076	0	0	0.28	868.94	60.945	255.034	306.166	3309.85
024	06/06/16	8	1430.45	30.358	37.637	32.005	107.456	133.223	50.349	14.502	21.483	13.286	3.8	0.466	3.011	265.836	0.931	0.98	24.622	4.575	1.206	3.541	26.377	46.541	1.013	362.93	162.076	469.603	1481.34	1966.41
024	06/03/16	8	2696.65	13.689	53.59	32.721	95.236	372.839	101.177	21.953	24.596	21.529	7.378	0.001	0.005	0.684	0.177	0.336	4.185	1.475	0.231	0	20.074	0	0.024	274.561	162.218	321.852	1178.39	4941.38
024	06/04/16	8	1696.34	12.057	58.363	27.568	54.72	264.871	55.607	13.916	20.073	3.77	1.165	0.044	1.12	0.576	0.195	0.247	1.422	0.854	0.223	0.153	60.984	6.25	0.762	408.138	37.178	90.818	602.996	2525.81
025	03/29/16	-1	1922.65	13.222	44.335	42.443	65.316	219.009	93.182	18.123	39.721	12.684	3.272	0.568	2.696	315.72	0.985	0.849	11.665	2.215	1.201	1.592	100.765	16.724	1.856	488.253	129.444	739.949	970.193	3860.66
025	03/27/16	-1	1325.53	19.008	42.711	38.282	64.719	145.424	57.931	10.552	23.57	16.621	2.491	0.182	1.026	1146.37	1.12	1.803	7.287	4.699	1.111	1.416	93.252	34.352	2.22	272.966	144.862	1116.74	2188.03	3322.93
025	03/28/16	-1	1710.26	11.187	44.86	43.953	49.604	198.91	86.616	15.356	31.324	2.566	0.521	0.046	0.475	4.149	0.685	0.736	7.261	2.335	0.516	0.236	37.852	12.813	0.372	75.871	42.935	257.926	695.797	4011.17
025	04/03/16	0	1703.49	13.583	42.618	43.799	59.41	186.405	85.142	18.163	36.794	16.14	2.692	0.31	1.278	1292.34	0.817	1.122	7.984	3.991	0.607	0.228	66.62	30.49	1.962	243.175	100.988	292.187	1481.53	3440.01
025	04/04/16	0	1443.77	13.007	43.659	43.334	48.212	161.825	71.388	14.64	36.702	8.295	3.527	0.441	3.075	510.945	0.898	1.257	10.893	3.186	0.742	0.885	87.727	23.3	1.704	513.945	86.393	372.129	1138.95	3213.42
025	04/05/16	0	1342.4	22.38	44.563	33.057	76.389	152.11	50.15	15.011	22.789	4.761	1.948	0.392	1.501	986.266	1.146	1.121	9.916	3.004	0.408	0.107	96.106	17.86	1.628	645.745	113.867	308.263	1364.65	3872.26
025	05/03/16	4	1586.64	15.013	54.576	30.411	60.371	219.469	54.352	22.42	18.397	7.536	6.028	0.295	1.71	662.337	1.113	2.155	11.767	5.74	0.933	0.894	139.755	43.549	0.994	510.496	491.77	1096.54	2516.88	1868.37
025	05/01/16	4	1762.67	28.266	29.692	42.042	124.938	131.241	82.591	11.64	25.948	33.829	11.377	0.873	7.922	752.782	0.918	1.316	33.143	6.463	2.218	1.719	207.99	79.204	3.496	322.11	196.418	1121.35	3003.42	2208.84
025	05/02/16	4	1381.73	28.035	50.888	21.077	97.745	177.42	32.661	17.945	14.099	8.077	3.199	0.375	2.656	2591.96	0.895	1.556	34.596	6.778	2.27	1.28	173.218	31.026	3.728	369.089	235.634	439.262	3092.06	1136
025	05/31/16	8	1829.43	25.964	33.882	40.154	128.928	168.249	88.619	16.464	26.987	13.403	10.699	0.508	9.982	281.182	0.718	1.096	36.852	4.233	1.82	0.736	64.327	24.666	3.412	258.813	196.221	280.445	2007.83	3052.79
025	05/30/16	8	1641.39	27.604	39.996	32.399	116.002	168.077	60.512	26.406	14.172	21.697	13.26	0.534	10.529	471.758	1.32	2.208	44.681	9.303	2.696	2.746	202.149	78.749	6.067	710.803	545.184	1150.73	3184.84	1188.1
025	05/29/16	8	1326.27	17.299	36.84	45.862	57.501	122.456	67.754	10.768	26.381	10.56	3.815	0.206	3.54	220.509	0.53	1.11	5.171	3.703	0.349	2.018	13.937	10.21	1.735	516.807	78.153	407.69	737.953	2768.58
026	03/27/16	-1	1000.26	34.747	40.363	24.89	86.963	101.017	27.686	8.13	6.529	11.835	6.819	4.395	1.94	223.938	0.828	0.79	27.987	6.027	2.779	10.144	118.114	0	1.089	82.257	213.563	1243.18	3191.5	193.477
026	03/28/16	-1	703.636	30.088	58.942	10.97	52.045	101.955	8.433	7.32	2.686	3.731	1.494	0.023	0.841	325.676	1.21	0.844	19.951	2.655	2.857	6.938	33.192	5.52	0.726	146.729	118.756	662.626	1478.19	594.166
026	03/29/16	-1	747.118	17.004	53.566	29.429	31.526	99.31	24.25	3.633	12.527	2.98	0.863	0.168	0.696	106.072	0.421	0.462	3.72	0.937	0.052	0.122	0	0	0.316	85.225	31.786	105.394	222.147	1210.38
026	04/03/16	0	776.625	23.372	56.271	20.358	43.601	104.975	16.879	10.707	7.049	5.918	1.545	0.085	1.349	373.897	0.75	0.896	11.573	2.411	1.254	2.708	55.761	14.647	1.115	141.378	143.586	521.238	1955.27	532.534
026	04/04/16	0	788.592	9.795	84.94	5.266	21.056	182.606	5.031	16.331	0.846	0.73	1.035	0.053	0.482	3.54	0.597	0.702	6.719	1.874	1.002	0	23.766	0	0.773	304.153	102.917	385.888	740.734	1371.21
026	04/05/16	0	617.253	8.861	69.328	21.811	14.559	113.902	15.926	11.567	5.687	5.229	2.64	0.162	2.467	53.16	0.994	0.377	4.543	1.956	0.414	0.012	144.088	40	2.274	283.27	101.248	238.804	853.118	780.128
026	05/05/16	4	1379.14	17.912	53.501	28.587	62.647	187.114	44.436	7.311	24.797	6.546	1.223	0.307	0.884	239.714	0.421	0.856	4.024	2.209	0.069	0.286	0.122	2.208	0.409	117.974	42.728	215.691	493.234	2095.57
026	05/06/16	4	1270.95	16.362	51.796	25.985	53.137	168.215	37.506	8.483	14.501	0.709	0.238	0.087	0.118	68.193	0.39	0.85	6.85	1.154	0.211	0.653	4.597	34.943	0.212	363.605	85.509	382.723	813.472	4372.12
026	05/07/16	4	1371.49	13.257	69.17	17.573	49.524	258.389	29.176	17.932	4.261	10.426	7.099	0.169	6.667	563.22	0.313	0.432	8.702	3.05	0.821	0.298	26.729	0	2.625	222.096	140.447	391.736	2172.38	1947.38
026	06/05/16	8	1395.58	14.862	43.613	41.525	52.318	153.532	64.969	9.218	23.006	13.841	4.661	0.222	2.728	309.129	1.156	1.722	12.836	3.882	0.944	2.684	92.846	58.791	2.643	606.579	149.954	578.588	1685.96	2245.77
026	06/06/16	8	707.574	28.623	19.793	35.446	50.558	34.962	27.827	3.069	9.775	9.842	5.23	0.602	4.554	59.393	0.294	0.842	9.499	1.978	1.138	3.985	22.541	45.239	1.107	106.021	115.736	458.376	1340.92	343.005
026	06/07/16	8	785.996	22.171	61.764	16.064	44.73	124.609	14.404	2.855	5.053	4.841	1.225	0.023	0.603	586.609	1.044	0.749	15.543	2.629	0.752	1.195	8.615	15.604	0.542	175.886	94.138	468.513	1237.3	885.342
028	03/27/16	-1	1856.19	17.038	42.364	40.598	80.138	199.259	84.868	17.562	28.864	17.597	5.336	0.257	3.029	1446.17	1.022	2.342	11.719	5.759	0.905	3.041	64.613	91.912	3.391	666.251	237.706	914.226	2272.28	3850.77
028	03/28/16	-1	1461.32	20.45	35.803	43.747	74.157	129.829	70.505	12.832	26.999	17.976	4.308	0.134	2.07	790.351	0.939	2.766	10.68	6.993	0.684	3.122	45.778	96.328	2.385	612.732	182.873	742.441	1907.86	3062.05
028	03/29/16	-1	1456.64	29.879	29.096	41.025	109.426	106.561	66.777	11.639	22.062	16.405	5.905	0.233	4.327	542.185	0.726	2.674	6.863	7.957	0.572	2.714	3.786	128.04	3.385	290.772	179.899	781.903	1482.22	4151.98
028	04/03/16	0	1009.49	22.78	44.837	32.383	59.296	116.711	37.464	9.054	12.832	9.535	6.746	1.954	4.462	656.792	0.573	0.725	5.975	3.32	0.808	1.329	82.563	2.208	3.52	463.477	347.034	758.325	1877.77	1844.67
028	04/05/16	0	2527.45	22.906	39.338	37.755	145.329	249.581	106.461	16.458	35.935	24.703	13.257	3.081	9.64	349.571	1.083	1.983	37.499	8.036	2.201	8.205	114.352	434.601	4.246	610.414	267.175	1425.76	3048.72	4520.35
028	04/04/16	0	2614.15	13.778	43.274	42.948	92.188	289.55	127.719	24.226	33.98	14.261	3.767	0.142	2.243	489.051	0.64	1.346	5.553	3.384	0.371	1.158	113.016	58.378	1.819	369.494	108.957	460.967	1329.54	4462.42
028	05/05/16	4	1784.49	17.712	40.07	37.238	79.632	180.156	74.41	15.32	19.54	8.622	17.792	0.583	5.203	0.625	0.649	0.347	7.314	1.902	0.564	0.084	5.575	0	0.98	499.398	272.702	681.473	952.742	3699.62
028	05/06/16	4	2441.01	21.132	31.634	39.821	130.393	195.199	109.206	18.503	44.914	31.06	13.481	0.629	12.784	227.924	1.323	1.993	23.307	5.918	2.099	5.56	30.904	87.648	2.626	1047.74	325.546	1559.21	2911.1	4967.26
028	05/07/16	4	2319.61	28.032	33.178	38.79	162.24	192.021	99.78	12.171	40.962	20.698	5.393	0.312	4.711	216.206	3.354	2.571	44.241	8.12	2.701	3.62	98.022	158.71	1.263	1077.85	314.675	1747.38	4283.2	4000.22
028	06/05/16	8	2455.68	20.521	36.22	43.259	126.332	222.982	118.363	22.345	37.745	34.46	13.119	0.666	8.702	340.059	1.632	2.837	28.145	6.117	1.18	5.404	22.071	111.199	2.613	610.101	226.764	1405.61	2097.1	5300.75
028	06/06/16	8	1597.13	30.156	28.95	40.894	120.487	115.671	72.618	11.532	22.689	28.149	13.802	2.828	8.536	1416.21	0.983	2.102	36.75	6.769	2.396	5.38	155.029	1096.78	2.003	784.842	380.668	1355.02	2915	2921.3
028	06/07/16	8	2463.88	22.036	36.409	41.555	135.808	224.387	113.821	14.756	29.983	47.171	16.646	0.796	12.487	313.17	0.881	2.268	24.144	6.886	1.209	2.136	50.167	85.504	1.922	343.502	178.343	1076.22	2807.95	4627.6
029	03/27/16	-1	1628.88	23.397	51.252	25.351	97.596	213.787	46.997	15.638	17.284	8.851	2.34	0.117	2.113	39.409	0.622	0.895	18.418	4.131	1.59	1.858	29.532	276.967	0.578	615.116	176.436	833.022	2068.35	3070.26
029	03/28/16	-1	2300.93	12.178	59.858	27.964	72.017	353.977	73.497	16.085	21.068	3.669	1.167	0.085	1.019	90.169	0.311	0.545	4.123	1.659	0.571	0.098	14.111	157.063	0.495	783.998	116.15	415.658	937.817	3168.68
029	03/29/16	-1	1929.99	12.994	57.491	29.515	64.875	287.04	65.494	11.085	24.066	3.651	1.166	0.085	1.018	90.169	0.295	0.455	3.897	1.359	0.57	0.098	16.511	157.063	0.483	1031.63	112.603	412.111	879.887	2526.32
029	04/03/16	0	1276.41	19.828	53.845	26.327	64.723	175.761	38.193	7.493	11.023	3.871	2.069	0.113	1.885	28.35	0.114	0.434	9.089	1.942	0.4	0.306	3.85	163.239	0.035	607.744	38.049	323.623	413.235	2495.81
029	04/04/16	0	1208.68	20.042	44.77	35.188	61.825	138.105	48.244	12.479	22.377	5.906	2.196	0.101	1.984	160.756	0.378	0.579	6.109	1.602	0.19	0.387	7.927	157.216	0.577	731.424	98.658	286.02	626.405	5815.57
029	04/05/16	0	1967.74	15.558	61.726	22.716	77.541	307.65	50.32	18.221	23.84	8.716	2.706	0.185	2.344	146.34	1.305	1.44	15.281	3.526	0.907	1.593	22.155	173.399	0.792	672.864	219.164	705.257	1471.22	2670
029	05/08/16	4	2194.42	15.451	56.834	27.716	86.96	319.877	69.329	16.295	25.758	6.834	2.14	0.116	1.841	7.185	1.897	0.671	7.425	2.369	0.685	0.624	28.902	168.144	0.278	1005.61	87.208	458.91	1574.78	2724.98
029	05/09/16	4	1876.48	12.473	64.587	22.94	60.595	313.779	49.532	21.322	17.738	1.663	1.079	0.113	0.895	68.76	1.158	1.048	6.476	1.873	0.613	0.084	55.139	154.416	0.492	968.535	110.545	362.993	1690.6	2697.38
029	05/10/16	4	1226.49	15.83	53.95	30.219	50.129	170.838	42.53	8.033	18.528	13.43	3.502	0.183	3.014	107.2	0.818	1.057	11.967	2.997	1.37	2.546	71.849	175.344	1.814	801.187	154.745	382.564	1965.75	1289.45
029	06/06/16	8	1829.12	17.582	52.391	30.027	81.916	244.099	62.179	5.904	24.228	8.964	1.382	0.058	1.207	45.99	1.156	0.683	8.374	2.095	1.072	0.856	20.139	171.412	0.25	637.877	85.357	421.189	1281	1681.71
029	06/07/16	8	1962.09	14.478	59.507	26.015	72.904	299.657	58.224	16.178	15.189	3.584	6.459	0.1	0.305	50.022	0.593	0.729	8.356	2.523	1.735	0.062	50.808	153.268	0.371	648.258	150.62	316.218	2472.3	2704.96
029	06/05/16	8	1816.46	24.924	48.039	27.038	114.065	219.853	54.996	4.394	16.98	17.19	7.511	0.408	6.173	77.494	0.524	1.086	20.134	4.284	1.53	1.241	15.139	184.702	1.213	706.474	157.04	872.526	1830.59	3744.52
031	03/27/16	-1	1674.28	30.731	23.244	46.025	129.451	97.915	86.168	8.061	42.733	30.916	3.811	0.795	2.807	682.726	0.652	1.927	11.553	3.266	1.373	10.073	65.225	229.582	2.498	752.135	194.405	1216.55	2496.46	470.942
031	03/28/16	-1	1261.6	29.591	26.362	44.047	94.331	84.04	62.407	11.179	22.895	26.1	6.868	0.738	5.799	332.967	0.7	1.357	24.876	3.077	1.437	3.852	36.745	86.101	2.286	446.888	164.595	625.506	1514.06	680.015
031	03/29/16	-1	816.578	48.989	13.202	37.809	98.484	26.54	33.781	7.127	11.127	13.188	4.439	0.44	3.874	184.069	0.418	0.908	32.518	3.207	2.103	3.628	14.457	57.751	2.044	157.065	144.623	594.415	1469.26	260.551
031	04/03/16	0	830.198	33.054	37.622	29.324	68.387	77.839	26.964	11.198	9.074	10.857	3.839	0.122	3.608	204.74	1.187	0.9	22.79	3.24	1.336	1.83	21.193	39.727	1.799	145.792	139.239	810.899	1719.34	1780.79
031	04/04/16	0	1371.17	22.819	56.272	20.909	80.813	199.288	32.911	24.475	6.723	14.019	8.186	0.2	7.962	0.07	1.983	0.926	29.968	2.863	1.268	0.956	6.669	5.52	3.138	238.57	304.296	1151.67	1954.14	2139.46
031	04/05/16	0	1259.69	21.127	48.853	30.02	66.226	153.137	41.822	4.34	13.921	2.582	0.943	0.061	0.857	20.125	0.847	0.349	14.57	1.255	0.778	0.938	10.117	5.52	0.799	463.13	59.249	500.721	1005.09	1724.39
031	05/06/16	4	1307.15	26.255	55.615	18.13	86.358	182.927	26.504	18.03	7.002	6.918	7.91	0.248	1.63	319.232	0.884	1.625	18.374	3.374	1.762	2.934	76.326	69.072	2.249	705.57	297.277	1121.27	2367.11	1516.72
031	05/07/16	4	2175.9	12.653	41.242	30.502	69.123	225.293	74.056	9.406	22.318	23.234	10.975	0.724	9.904	345.907	0.792	1.27	10.701	2.371	0.717	1.389	36.32	52	4.554	553.04	139.781	787.573	1252.96	4039.97
031	05/05/16	4	1333.31	26.244	59.328	14.428	89.161	201.562	21.785	17.053	6.256	6.035	3.649	0.182	1.309	110.608	0.731	1.369	17.152	3.734	2.342	3.038	97.021	13.608	2.49	584.434	350.389	1165.75	3257.54	1666.99
031	06/06/16	8	1115.02	25.158	43.876	30.966	71.51	124.718	39.12	18.988	9.761	8.42	7.091	0.942	1.564	918.904	0.926	1.121	26.432	2.494	0.742	4.349	219.252	111.564	2.7	437.186	173.005	871.994	1992.03	866.421
031	06/07/16	8	1047.86	15.368	61.126	23.506	42.73	169.962	29.049	22.472	12.665	3.538	1.921	0.329	1.55	227.955	0.648	0.751	4.907	2.125	0.558	0.564	191.031	28.8	2.723	495.931	132.349	411.528	1185.07	1723.5
031	06/05/16	8	2077.82	11.556	58.272	30.172	61.436	309.807	71.293	37.878	18.676	0.123	0.527	0.035	0.493	7.86	0.496	0.276	3.608	0.586	0.115	0	69.692	0	0.442	564.94	33.69	86.5	308.82	3374.14
033	03/31/16	-1	2186.78	19.972	51.513	28.516	108.276	279.27	68.709	22.282	22.994	28.1	10.667	0.293	8.377	858.334	1.13	1.872	21.88	3.856	1.917	6.969	327.76	127.951	3.085	719.681	379.996	930.081	3232.85	2754.31
033	04/01/16	-1	2686.77	17.193	38.999	30.31	121.244	275.024	94.997	24.275	28.539	31.915	15.999	0.639	4.902	661.249	2.02	2.535	27.557	6.42	3.939	5.677	332.154	150.59	1.355	823.796	491.093	1346.85	5347.88	5339.47
033	04/02/16	-1	2003.73	17.719	40.314	41.967	89.851	204.426	94.581	19.61	26.895	31.916	17.898	0.275	15.505	437.519	1.206	1.972	21.307	5.935	1.567	4.886	83.204	90.5	7.677	506.483	280.42	1109.24	1794.62	2575.27
033	04/08/16	0	3570.83	13.694	43.79	42.516	122.36	391.288	168.846	13.074	69.45	51.987	10.198	0.734	9.188	286.204	2.441	2.443	21.108	7.996	1.882	5.587	42.677	107.332	2.671	822.449	211.425	1224.38	3075.1	9093.68
033	04/07/16	0	1398.58	12.448	57.292	30.26	45.393	208.918	49.043	18.926	20.066	13.885	3.763	0.684	2.78	2223.74	1.09	1.7	15.958	3.902	2.323	2.139	339.734	47.161	3.412	480.099	237.799	535.313	3184.73	2466.88
033	04/09/16	0	2065.61	20.787	30.041	49.172	106.459	153.848	111.924	13.973	47.28	22.854	4.625	0.481	4.144	167.303	1.593	1.313	9.046	3.956	1.301	2.414	133.312	71.604	2.183	246.614	141.571	922.849	1948.11	6756.23
033	05/09/16	4	1118.17	21.028	54.866	24.106	61.007	159.178	31.083	21.841	11.104	9.865	1.95	0.419	1.147	2141.9	0.686	1.211	10.497	4.338	2.055	2.31	347.018	154.25	1.628	899.485	280.43	845.878	3531.42	1207.04
033	05/10/16	4	2793	17.991	53.269	28.74	127.385	377.178	90.444	29.531	30.249	27.947	7.544	0.743	6.234	922.019	2.271	1.884	26.503	7.649	2.126	4.462	184.942	125.086	3.778	701.174	344.925	1381.47	3313.23	6724.37
033	05/08/16	4	1658.13	11.116	45.094	43.791	45.723	185.49	80.058	10.576	23.951	16.362	4.64	0.605	3.977	1743.4	1.2	1.08	10.496	4.005	1.01	1.768	40.516	72.34	1.689	195.064	94.361	369.681	1616.37	2564.26
033	06/05/16	8	2127.1	21.198	53.707	25.095	112.641	285.388	59.266	9.585	22.155	6.636	0.539	0.078	0.405	4.65	1.579	1.797	23.952	3.634	0.621	4.25	90.818	194.75	0.471	947.387	68.611	708.774	1282.59	2906.53
033	06/06/16	8	2202.46	17.218	57.384	25.398	98.622	328.691	64.658	21.345	18.522	20.401	3.954	0.568	2.686	1064.53	1.295	2.198	25.37	6.747	2.145	6.695	222.085	44.61	1.147	367.901	259.143	765.814	3224.91	2637.65
033	06/07/16	8	2022.09	13.85	60.156	25.994	75.375	327.388	62.875	24.241	13.995	3.908	3.067	0.428	1.898	1325.07	1.03	1.371	11.86	3.042	1.682	0.136	307.374	22.026	1.529	420.327	237.919	433.638	2502.38	3586.87
034	03/29/16	-1	1994.84	12.761	55.446	31.793	64.555	280.491	71.482	14.227	28.976	7.241	6.401	0.045	1.077	114.507	1.79	2.466	35.489	1.561	1.007	1.017	20.471	41.921	0.842	1108.64	111.21	1325.83	1608.12	3087.3
034	03/27/16	-1	1730.46	18.078	33.769	48.153	79.976	149.392	94.677	11.936	22.154	28.069	11.936	0.301	10.366	175.932	1.315	1.223	15.824	2.78	0.779	1.821	22.514	69.204	4.366	422.411	152.37	1120.72	1248.25	4397.27
034	03/28/16	-1	1509.52	25.794	34.689	39.517	98.284	132.174	66.921	9.841	24.915	14.169	6.687	0.187	4.989	185.751	1.435	1.176	22.381	4.056	1.187	2.284	32.2	165.608	2.731	623.288	169.238	948.616	1749.05	2426.65
034	04/05/16	0	1928.67	17.898	46.36	35.742	88.013	227.971	78.115	18.26	20.04	19.689	11.86	0.49	11.191	856.122	1.002	1	22.213	5.003	2.112	1.173	150.422	6.804	5.113	564.582	227.641	798.098	2695.8	2314.05
034	04/03/16	0	1926.48	12.931	45.421	41.648	62.785	220.529	89.87	16.505	24.27	15.653	9.21	0.403	2.158	79.936	0.446	0.684	9.703	2.265	0.964	2.502	90.796	170.312	0.627	601.285	142.515	497.991	1353.35	3394.34
034	04/04/16	0	1590.85	15.555	53.535	30.911	63.827	219.673	56.373	17.81	17.847	0.049	0.273	0.188	0.083	536.513	0.275	0.352	2.578	1.007	0.853	0	148.679	75	2.42	860.578	164.267	227.723	1610.27	4205.42
034	05/05/16	4	1310.49	17.015	49.521	33.464	56.951	165.75	49.78	13.962	21.963	12.091	5.263	0.298	3.051	333.393	0.971	1.219	10.569	2.372	1.089	2.669	117.966	175.984	1.798	990.874	184.848	625.931	1998.78	2160.85
034	05/06/16	4	2019.37	16.149	48.367	35.484	82.152	246.051	80.228	9.505	34.723	14.64	6.534	0.275	2.91	14.328	1.243	1.356	12.715	1.558	0.497	3.39	2.017	21.92	0.738	1130.23	74.435	849.203	1379.01	3163.05
034	05/07/16	4	2136.49	15.702	55.577	28.721	84.621	299.521	68.793	17.878	19.125	21.619	14.865	0.242	12.056	0	1.54	1.414	19.208	2.128	0.7	1.263	72.356	0	6.584	663.401	193.39	937.569	2360.95	3840.09
034	06/05/16	8	1961	14.017	57.902	28.081	69.251	286.059	61.66	11.057	17.622	11.279	4.528	0.048	1.105	156.129	0.616	0.955	7.695	2.31	0.816	1.317	77.04	82.228	0.91	609.606	84.68	480.625	1626.07	2872.38
034	06/06/16	8	1779.47	16.726	53.56	29.714	74.556	238.743	58.868	8.699	22.77	12.088	3.514	0.003	0.311	1528.03	0.614	0.704	12.82	2.904	0.932	3.799	107.014	233.693	0.045	744.291	97.873	638.84	1656.91	2564.26
034	06/07/16	8	1340	21.896	45.185	32.919	73.333	151.333	49	8	22	0	0	0	0	0	0.16	0	0	0	0	0	101.6	0	0	270	0	0	426.667	2690
035	03/27/16	-1	917.214	24.558	35.841	39.601	56.623	82.638	40.582	8.045	16.191	10.804	5.172	0.36	4.051	370.317	0.666	2.379	9.355	6.39	0.654	3.145	87.494	115.5	2.745	690.126	181.23	665.629	1886.46	1320.26
035	03/29/16	-1	1402.21	27.793	44.843	27.365	96.811	156.203	42.365	7.724	18.573	14.906	2.503	0.091	1.422	297.501	1.486	3.053	19.357	8.473	1.282	4.964	36.951	173.583	0.896	713.184	216.347	767.901	2718.48	2374.86
035	03/28/16	-1	1931.21	12.385	46.466	41.149	59.346	222.656	87.636	5.215	52.757	21.115	3.939	0.974	1.945	778.483	1.818	2.237	7.284	7.888	0.624	1.669	41.75	437.008	2.372	1289.48	141.857	643.919	1697.13	1720.14
035	04/03/16	0	1467	23.416	53.038	23.546	85.494	193.65	38.21	13.58	9.609	7.106	3.424	0.16	2.14	191.441	0.807	1.818	12.538	5.232	0.334	1.072	2.012	37.5	1.222	647.119	80.444	320.322	1012.68	3497.87
035	04/04/16	0	2343.12	22.709	49.306	27.985	133.464	289.779	73.099	25.2	35.739	9.399	4.002	0.278	3.651	383.869	1.668	2.825	27.942	6.979	1.478	1.975	32.888	185.971	2.756	1618.07	231.425	1381.21	2811.31	6403.06
035	04/05/16	0	2061.14	22.52	53.544	23.936	115.07	273.594	54.358	10.863	22.55	8.681	5.99	0.354	3.4	188.795	2.687	2.764	22.301	6.593	0.938	0.705	18.42	163.44	1.639	1391.53	195.205	972.419	2137.87	5228.69
035	05/05/16	4	3751.1	21.464	33.073	45.463	201.24	310.08	189.439	13.11	84.624	59.304	29.874	1.816	11.297	1270.82	2.074	3.053	47.338	12.338	2.457	5.747	49.884	485.856	4.485	1497.86	288.488	1960.91	3375.59	3420.32
035	05/06/16	4	2713.91	33.236	39.03	27.734	226.828	266.37	84.125	25.11	43.625	8.901	2.589	0.438	2.008	243.487	1.23	1.901	58.912	8.793	2.667	1.584	49.412	175.202	0.591	1643.46	193.158	195.202	2657.1	6167.4
035	05/07/16	4	2274.76	19.743	41.389	38.868	113.91	238.801	99.67	27.002	38.771	11.416	1.191	0.403	0.781	215.75	0.733	1.4	19.083	4.655	0.709	1.998	25.2	53.5	0.788	1123.41	80.801	339.9	1177.63	3412.87
035	06/05/16	8	2914.62	24.322	25.652	50.026	177.478	187.187	162.244	22.756	64.536	45.219	7.334	1.079	6.247	304.287	1.02	3.114	31.143	7.903	2.006	9.721	20.781	211.681	2.801	1071.98	264.975	1347.79	3175.6	2784.29
035	06/06/16	8	1632.62	19.597	61.564	18.839	80.073	251.549	34.212	20.591	12.164	7.03	1.768	0.129	1.045	486.229	1.161	2.052	13.985	5.158	0.414	1.102	20.372	65.603	1.591	513.845	155.296	408.127	1978.75	2815.23
035	06/07/16	8	1921	16.498	56.635	26.867	79.482	272.844	57.526	7.891	24.667	0.392	0.366	0.014	0.309	0	1.535	1.691	8.695	6.023	0.344	0	29.4	100	0.359	899.271	104.913	226.699	1077.43	2909.6
037	03/27/16	-1	1879.73	22.299	39.276	38.425	104.708	184.424	80.191	10.871	24.375	25.018	19.11	4.328	7.063	25.653	1.625	2.067	30.066	6.756	2.794	5.452	32.85	762.398	2.598	1242.16	216.017	881.309	3100.38	2626.3
037	03/28/16	-1	2381.17	20.059	33.579	38.352	118.878	198.998	101.015	11.119	30.882	34.992	22.029	1.051	13.796	75.46	1.429	2.046	33.745	6.813	2.324	1.144	30.45	114.4	2.602	929.58	257.4	1006.74	2824.79	2617.5
037	03/29/16	-1	1649.7	21.894	36.111	41.995	90.242	148.846	76.932	8.863	23.699	28.664	14.069	0.66	9.369	208.5	0.881	1.612	18.032	5.462	1.6	1.6	31.73	259.2	3.407	1062.68	161.92	727.86	2158.94	1855.32
037	04/03/16	0	2311.7	22.887	39.922	28.537	130.705	227.991	72.432	11.492	16.97	14.447	14.472	0.614	7.8	42.409	0.903	1.133	15.767	2.586	0.878	0.759	5.9	65.458	0.632	469.002	120.507	568.46	776.893	5257.5
037	04/04/16	0	1932.72	24.623	30.409	34.698	118.482	146.319	74.204	6.317	15.854	24.717	25.851	0.996	12.651	78.42	1.031	1.724	25.414	5.236	1.626	0.978	10.266	34.56	0.496	260.264	182.608	704.238	1573.82	2819.54
037	04/05/16	0	2129.86	17.612	39.477	42.911	94.714	212.298	102.561	12.373	30.687	29.802	30.419	0.477	5.62	23.56	1.662	0.984	17.646	2.19	1.583	2.492	35.09	278.848	2.543	1294.7	183.72	816.04	2385.54	4411.38
037	05/07/16	4	984.541	30.525	37.28	32.195	76.661	93.627	35.937	5.717	6.994	2.941	2.049	0.23	1.817	35.869	0.622	0.497	8.695	0.745	0.595	0.134	23.386	4.887	0.466	370.686	88.27	173.826	1255.35	1840.1
037	05/06/16	4	901.732	26.966	40.749	32.285	62.661	94.688	33.343	5.617	6.312	1.597	0.985	0.119	0.866	3.54	0.44	0.347	6.965	0.618	0.567	0.118	23.386	2.24	0.25	317.192	76.736	127.372	1196.57	1572.4
037	05/05/16	4	1120.29	23.491	63.541	12.967	66.616	180.189	16.343	13.753	4.312	1.597	0.985	0.119	0.866	3.54	0.44	0.347	6.965	0.618	0.567	0.118	11.386	2.24	0.25	350.557	76.736	127.372	2253.37	3442.71
037	06/06/16	8	1572.93	15.256	41.95	42.793	60.401	166.083	75.298	11.466	23.259	4.74	2.422	0.032	0.056	3.54	0.07	0.266	1.237	0.995	0.435	0	23.162	200	0.142	998.939	38.954	33.054	538.303	1857.41
037	06/07/16	8	1211.42	21.536	47.875	30.589	66.853	148.618	42.203	7.72	18.475	4.776	2.424	0.032	0.059	3.54	0.103	0.445	1.688	1.595	0.438	0	27.066	200	0.165	735.358	46.047	40.147	654.166	1653.97
037	06/05/16	8	981.983	16.175	40.928	22.997	40.169	101.639	25.383	4.049	11.451	1.792	1.234	0.143	1.089	3.54	0.624	0.9	9.142	2.147	0.917	0.26	13.786	102.24	0.337	666.616	110.635	250.145	995.07	1464.03
038	03/27/16	-1	1522.43	11.913	55.111	32.976	46.336	214.356	57.004	31.584	13.298	21.953	9.233	0.253	3.484	1004.24	0.469	0.462	6.799	3.64	0.845	0.944	27.306	32.659	5.486	263.581	138.544	407.06	1892.24	3286.02
038	03/28/16	-1	1539.99	13.154	29.682	57.164	52.952	119.491	102.278	32.064	18.379	49.288	21.792	0.613	7.727	175.738	0.79	1.161	14.75	7.864	1.844	2.839	67.34	114.011	8.879	175.654	230.976	754.788	3540.05	2226.65
038	03/29/16	-1	2272.74	15.753	40.819	43.428	89.542	232.027	109.715	21.906	49.405	20.814	10.934	0.197	3.196	162.165	1.115	1.006	10.973	3.252	0.893	3.393	47.838	58.513	1.692	990.834	205.784	798.7	1953.95	4369.45
038	04/05/16	0	1763.12	25.138	46.519	28.343	110.976	205.365	55.611	11.162	23.94	14.254	4.587	0.306	3.197	359.435	1.179	1.514	15.329	4.009	1.495	3.182	222.913	29.624	3.743	649.743	200.673	672.755	2437.01	2386.8
038	04/03/16	0	1258.93	29.817	49.479	20.703	93.657	155.417	28.902	10.112	7.076	9.903	4.788	0.376	4.34	171.736	0.73	1.023	24.067	3.947	1.606	1.771	91.071	28.635	1.41	211.747	185.534	860.192	2012.44	3242.82
038	04/04/16	0	1600.46	26.945	42.94	30.115	106.621	169.91	52.962	7.652	21.445	13.353	4.249	0.531	2.139	31.252	0.822	0.909	19.519	1.86	1.203	4.148	72	44.266	0.45	576.09	192.236	757.111	1612.46	1010.45
038	05/07/16	4	1710.38	18.693	57.599	23.708	79.52	245.03	44.825	9.39	13.677	17.002	8.968	0.32	3.21	182.335	1.072	1.181	18.617	4.081	1.731	4.643	216.97	102.802	1.856	294.118	168.665	901.817	2888.82	1356.51
038	05/05/16	4	1450.4	20.452	56.917	22.63	74.684	207.842	36.728	6.506	9.043	10.277	13.053	0.23	3.087	161.004	1.09	1.047	16.753	3.967	1.317	2.435	248.715	89.503	1.525	169.473	163.878	754.678	2522.65	1341.98
038	05/06/16	4	1432.2	15.707	62.162	22.13	56.484	223.539	35.37	11.115	8.726	12.921	9.286	0.832	8.398	253.196	1.292	1.36	16.383	3.677	1.345	1.358	171.171	58.804	3.188	329.82	141.883	717.461	2644.98	1376.71
038	05/29/16	8	1448.06	17.764	31.072	51.164	65.292	114.207	83.581	18.043	34.384	27.667	9.459	0.654	4.779	222.035	0.796	0.771	6.591	2.438	0.722	2.179	61.775	40.335	1.089	533.734	306.796	706.787	888.674	1888.97
038	05/30/16	8	1460.11	15.872	43.796	40.333	59.697	164.723	67.421	19.934	24.203	14.204	6.914	0.247	4.062	466.992	0.636	0.71	9.685	3.206	1.211	0.569	89.335	24.459	2.533	239.109	323.735	675.927	1843.81	1318.19
038	05/31/16	8	1642.18	12.773	44.506	42.721	54.347	189.37	80.79	17.49	24.076	13.201	6.151	0.15	3.709	310.742	0.717	0.494	2.267	1.152	0.704	0.339	67.279	17.655	2.806	198.53	297.233	609.281	991.528	1409.52
039	04/02/16	-1	2199.42	15.076	49.073	35.851	83.985	273.383	88.765	25.973	27.614	9.018	3.794	0.054	2.509	849.065	1.816	0.38	9.797	2.34	1.291	0.326	115.996	129.367	0.96	755.91	194.04	489.28	2106.27	3070.69
039	03/31/16	-1	2341.65	15.999	47.38	36.62	95.214	281.971	96.86	8.192	51.076	20.371	4.562	0.032	0.063	1174.86	0.658	2.244	12.605	8.294	1.7	3.184	106.347	206.602	0.213	1910.57	384.05	737.872	3493.02	5712.87
039	04/01/16	-1	2076.5	20.987	44.073	27.772	111.39	233.918	65.512	22.86	20.959	10.657	3.817	0.435	3.239	994.98	1.79	1.619	24.331	6.005	1.9	1.687	208.04	177.859	3.992	980.605	256.733	903.716	2949.34	2808.39
039	04/09/16	0	3263.12	11.096	43.717	45.187	94.009	370.387	170.153	20.584	47.265	33.099	17.873	0.459	7.644	737.035	0.919	1.358	10.077	3.064	0.818	1.389	21.326	471.332	2.894	865.857	144.528	536.523	757.631	5555.63
039	04/08/16	0	2892.72	12.352	48.454	36.579	89.844	352.444	118.253	18.096	31.91	15.83	16.695	0.154	2.685	262.671	0.646	1.641	6.644	4.367	0.576	1.728	78.096	139.597	1.311	470.657	206.614	585.495	1701.46	4558.37
039	04/07/16	0	2078.03	12.246	51.285	36.469	64.996	272.187	86.023	21.096	16.142	20.015	21.8	0.044	0.12	109.237	0.592	1.08	8.591	3.473	1.215	2.02	135.558	212.391	0.438	760.778	186.535	559.417	2312.51	4275.6
039	05/12/16	4	1783.43	18.243	53.533	23.986	82.069	240.823	47.956	22.332	14.978	4.054	2.833	0.119	1.331	13.6	0.817	0.956	12.097	2.347	0.832	0.473	105.332	228.36	0.66	1231.11	122.142	343.402	1362.39	2733.11
039	05/13/16	4	1853.59	16.018	38.555	45.427	74.787	180.014	94.266	10.126	22.032	27.495	21.056	0.739	11.852	141.302	1.386	0.777	16.792	3.525	1.237	0.884	106.429	171.3	0.06	553.106	129.775	527.005	1002.07	2337.93
039	05/14/16	4	2578.54	15.539	38.738	45.723	100.171	249.712	130.995	10.552	39.943	33.447	17.33	0.715	11.375	83.3	1.153	1.464	21.8	3.539	1.38	1.731	86.72	83.8	0.047	802.415	120.673	764.762	1408.72	3450.45
039	06/12/16	8	1740.12	12.306	57.269	30.425	55.089	256.368	60.533	15.569	25.317	7.878	8.081	0.459	2.488	28.648	0.568	1.039	6.185	3.787	1.432	1.479	146.934	36.565	1.909	575.936	202.547	291.967	2473.68	2452.61
039	06/13/16	8	2181.51	14.025	51.528	34.447	78.447	288.22	85.636	18.981	35.695	19.659	13.113	0.798	7.679	650.833	2.153	1.156	9.926	5.021	1.11	1.987	104.381	100.769	1.948	1116.49	315.477	961.523	2668.67	3568.8
039	06/14/16	8	2155.38	17.344	52.874	29.783	95.863	292.245	73.163	21.474	17.771	7.411	5.363	0.223	2.887	610.371	0.529	0.824	32.039	3.546	1.955	1.789	83.803	186.108	0.165	351.144	201.92	75.172	2337.11	2151.99
040	03/27/16	-1	392.458	34.048	55.829	10.122	34.84	57.128	4.603	5.561	0.209	0.143	0.402	0.263	0.112	402.049	0.24	0.199	5.153	0.538	0.436	1.29	8.791	30.618	1.329	103.787	53.035	310.137	790.096	610.677
040	03/28/16	-1	851.323	35.75	48.829	15.421	74.148	101.272	14.215	3.929	2.583	4.972	4.922	0.329	4.519	10.206	1.134	1.004	31.963	2.937	1.119	0.649	0	21.768	1.109	143.95	113.365	365.078	1144.39	1432.9
040	03/29/16	-1	1259.01	30.519	40.037	29.444	95.982	125.919	41.157	10.319	20.253	3.138	1.983	0.109	1.649	91.707	0.953	0.839	33.717	4.692	2.156	0.578	63.032	13.608	1.477	595.957	185.74	305.931	2653.08	1733.6
040	04/03/16	0	1204.36	10.465	77.422	12.113	31.574	233.597	16.244	14.662	5	5.575	3.69	0.29	3.08	44.7	0.316	0.453	4.368	3.114	0.308	0.075	0	8.4	0.672	150.356	91.531	327.487	426.885	1163.49
040	04/04/16	0	2382.34	43.908	46.702	9.39	257.659	274.057	24.489	21.426	8.952	7.667	4.589	0.424	3.14	119.987	1.31	1.556	108.966	12.065	7.23	2.509	78.528	95.45	0.348	247.585	495.245	797.296	7953.49	1484.52
040	04/05/16	0	1431.67	34.885	50.837	14.278	122.553	178.592	22.294	14.888	6.429	7.185	4.268	0.302	3.643	60.172	0.74	0.861	54.233	6.118	3.324	1.123	38.784	27.216	0.186	168.119	239.634	358.671	3561.48	572.651
040	05/05/16	4	1652.8	21.062	34.007	44.931	86.381	139.469	81.899	8.306	31.223	21.296	14.174	0.848	13.174	180.78	0.746	0.902	17.897	2.674	0.835	0.842	2.04	107.608	0.656	779.262	71.358	493.256	654.678	2053.01
040	05/06/16	4	956.045	10.49	58.5	31.009	25.655	143.069	33.705	14.7	5.841	14.595	11.05	0.576	10.454	653.056	0.838	0.649	11.004	0.971	0.634	0.06	48.497	43.2	3.868	296.016	144.169	448.969	1140.98	1132.27
040	05/07/16	4	1344.93	11.781	54.765	33.455	40.694	189.171	51.36	6.584	19.067	18.274	10.667	0.397	5.513	383.97	1.136	1.144	12.59	2.544	1.086	0.744	36.744	117.04	0.571	586.499	126.944	591.094	1627.7	3073.24
040	05/30/16	8	1193.12	15.537	45.615	38.848	46.705	137.123	51.903	9.133	23.661	0.095	0.503	0.026	0.469	0	0.382	0.257	3.239	0.284	0.036	0	0.99	0	0.206	770.54	27.684	70.525	159.199	2230.23
040	05/31/16	8	1080.2	15.009	48.997	35.994	40.761	133.066	43.446	8.73	21.277	4.546	2.52	0.179	2.338	147.216	0.655	0.755	7.239	2.737	1.077	0.972	31.181	0	1.214	685.736	124.538	437.704	1850.31	1212.47
040	05/29/16	8	1034.41	27.306	21.105	51.589	71.615	55.352	60.133	5.633	16.798	10.053	3.602	0.197	3.201	234.267	0.931	0.796	11.337	1.88	0.562	1.265	0.192	51.171	1.538	221.113	85.124	731.446	906.692	2353.35
041	03/28/16	-1	2432.66	12.343	60.386	27.271	77.77	380.478	76.368	38.491	26.933	22.909	6.697	0.422	5.75	190.093	1.153	1.604	10.297	4.32	1.079	1.306	188.857	17.106	4.312	570.525	310.05	1053.02	3069.75	5168.55
041	03/29/16	-1	2469.78	14.537	51.333	34.13	89.834	317.216	93.737	3.633	37.993	16.186	5.566	0.228	4.907	153.712	1.275	1.164	12.388	1.426	0.346	2.787	139.884	226.28	1.389	1457.16	96.646	537.456	1786.48	4479.4
041	03/27/16	-1	2075.91	19.966	47.948	32.086	104.558	251.099	74.68	8.45	35.378	13.578	3.729	0.55	2.796	147.786	0.668	1.216	7.46	3.817	0.759	3.566	8.739	55.594	1.745	1159.26	99.567	690.465	1525.92	3575.4
041	04/03/16	0	2466.97	16.339	63.554	20.107	102.459	398.538	56.038	25.178	23.045	7.783	2.81	0.259	2.55	308.42	1.201	2.158	14.367	3.576	1.328	2.588	263.16	28.227	2.361	868.092	285.501	868.297	4594.77	2678.14
041	04/04/16	0	1817.12	18.348	42.539	39.113	83.766	194.211	79.364	5.863	33.083	17.111	10.047	0.623	9.306	182.58	0.786	1.509	13.455	4.676	0.938	1.425	292.297	61.354	1.276	927.848	94.577	700.146	1575.73	2137.37
041	04/05/16	0	2056.39	23.83	35.373	40.797	121.457	180.294	92.417	11.998	32.633	14.322	8.258	0.511	7.63	341.59	0.801	1.676	20.441	4.178	0.794	1.036	61.439	61.44	2.419	929.698	125.536	555.102	1388.64	5306.31
041	05/07/16	4	1439.66	16.452	46.684	36.865	59.722	169.466	59.476	9.538	19.247	7.403	3.031	0.156	2.217	139.36	0.423	0.897	4.03	2.709	0.236	1.039	20.064	2.083	1.077	313.351	47.797	286.137	707.22	2601.72
041	05/05/16	4	1518.71	19.244	46.368	34.388	74.231	178.858	58.953	10.511	19.421	9.497	3.087	0.106	1.723	93.806	1.299	0.592	10.035	1.783	0.859	0.841	176.414	28.268	0.749	221.425	67.562	400.078	1928.81	1984.9
041	05/06/16	4	1133.79	22.614	32.534	44.852	62.899	90.488	55.444	1.632	15.935	16.704	9.477	0.516	7.596	204.722	0.49	1.322	26.638	3.516	0.751	1.654	0.48	10.522	1.028	170.285	269.723	567.323	792.604	1680.55
041	06/07/16	8	1750.48	21.343	44.165	34.492	95.062	196.717	68.281	8.922	18.79	12.211	4.799	0.164	2.508	214.993	0.286	0.889	9.889	2.933	0.965	4.799	73.173	36.103	2.773	191.086	89.611	667.418	1683.65	2507.2
041	06/05/16	8	1967.38	9.59	52.527	37.883	47.718	261.377	83.781	8.117	24.926	21.886	22.814	2.341	16.503	257.587	1.655	1.171	15.098	2.27	0.603	0.915	118.332	18.741	5.086	419.93	163.564	382.042	1522.62	2177.89
041	06/06/16	8	1163	17.721	75.494	6.786	52.653	224.313	8.961	8.447	1.574	0.343	0.262	0.073	0.171	53.394	0.922	0.885	7.834	2.42	0.804	0.147	163.992	14.842	1.44	223.623	112.563	459.327	2004.55	2441.41
042	03/27/16	-1	1998.11	19.771	41.709	38.521	98.91	208.664	85.651	6.751	23.73	32.543	10.308	0.345	6.66	1346.76	1.888	2.776	18.761	7.212	2.459	5.994	9.63	237.156	3.934	390.609	175.806	1160.31	2663	2620.59
042	03/28/16	-1	1399.82	27.399	32.791	39.81	96.022	114.918	62.008	6.443	25.944	15.667	8.151	0.449	6.892	365.388	1.013	1.515	22.364	5.953	1.553	2.299	6.041	128.263	2	580.694	170.229	962.697	1655.15	2353.01
042	03/29/16	-1	1794.63	15.469	55.469	29.063	69.251	248.327	57.827	7.568	18.482	19.949	4.89	0.05	0.562	0	1.457	1.156	20.414	1.317	0.741	4.71	3.6	83.84	0.128	370.006	98.293	664.869	682.651	2433.82
042	04/05/16	0	1636.85	21.857	53.229	24.913	91.061	221.761	46.13	12.622	14.58	11.173	6.195	0.264	4.497	322.122	1.164	1.38	23.848	7.008	2.058	2.23	12.083	156.998	2.285	496.502	258.24	1077.65	2437.25	3161.94
042	04/03/16	0	2459.53	12.96	59.578	27.462	80.965	372.208	76.251	13.966	37.177	10.973	7.676	0.49	5.713	180.223	2.288	1.456	24.708	3.492	2.123	1.391	89.787	152.065	0.928	1217.41	200.762	984.944	2523.61	5834.91
042	04/04/16	0	915.714	18.977	48.56	32.463	44.695	114.37	33.982	13.626	11.227	5.395	4.876	0.486	4.394	583.236	0.428	0.834	5.055	2.067	0.545	1.11	58.125	52	2.54	301.193	127.885	431.149	907.706	2136.59
042	05/07/16	4	1333.48	19.929	57.87	22.201	69.236	201.043	34.279	10.72	13.703	0.324	0.378	0.054	0.327	38.476	1.264	0.155	4.908	1.247	0.544	0	21.519	100	0.481	407.977	89.349	199.825	331.024	3057.82
042	05/06/16	4	2326.2	21.74	46.155	32.106	127.54	270.775	83.713	20.329	31.563	29.607	3.502	0.729	2.773	9.834	1.757	0.888	19.168	3.323	1.601	7.348	48.563	181.647	0.827	501.246	150.659	895.76	1457.44	3500.35
042	05/05/16	4	1409.74	15.822	57.314	26.864	56.342	204.098	42.518	12.834	13.262	0.406	0.494	0.014	0.48	4.917	1.254	0.073	3.915	1.585	0.371	0	41.081	100	0.073	312.796	60.59	288.582	804.419	2509.29
042	06/05/16	8	1709.26	16.383	51.41	32.207	73.422	230.403	64.152	19.11	22.849	9.927	5.229	0.4	4.751	186.951	0.625	0.794	10.435	3.917	1.315	1.456	33.224	30.779	1.014	192.876	106.939	486.757	1525.32	4907.19
042	06/06/16	8	2082.67	28.945	36.722	34.333	150.855	191.389	79.529	19.57	32.681	18.899	1.85	0.505	1.344	406.03	0.728	0.795	30.779	4.082	2.912	6.247	73.846	79.949	2.483	459.25	190.41	932.213	2842.57	4631.99
042	06/07/16	8	1790.37	26.044	43.496	30.46	116.662	194.836	60.641	12.553	17.776	15.939	4.404	0.199	3.972	7.65	3.355	1.329	25.587	3.282	1.681	1.862	7.021	151	0.332	889.27	175.963	977.88	1263.45	2461.98
044	04/03/16	-1	2355.9	14.465	59.943	25.592	87.885	364.208	69.109	34.02	31.985	13.026	6.173	0.684	3.931	533.208	2.859	1.487	18.353	4.14	1.85	1.605	110.505	22.56	6.668	607.318	150.814	828.737	3186.58	6553.2
044	04/04/16	-1	1943.92	15.768	45.792	30.62	76.847	223.176	66.325	16.936	26.221	16.745	6.621	0.12	1.684	180.368	1.511	1.652	14.752	3.239	0.998	2.619	73.567	91.906	1.077	622.133	150.881	1156.32	1710.49	2335.76
044	04/05/16	-1	3287.08	29.041	32.704	38.255	237.657	267.638	139.139	24.807	47.566	24.332	3.56	0.1	2.809	121.057	6.157	3.502	47.596	6.781	2.871	3.63	44.668	65.117	1.677	1426.84	239.833	1887.78	3739.34	5041.44
044	04/11/16	0	1844.9	21.438	48.031	30.531	98.696	221.123	62.47	14.267	29.476	14.955	4.771	0.409	3.131	394.383	2.34	1.84	14.437	5.028	1.37	2.258	81.018	79.17	1.135	992.947	177.221	1212.54	1886.23	3419.17
044	04/12/16	0	1966.34	14.532	69.652	15.816	73.251	351.09	35.433	34.03	13.616	6.376	6.337	0.195	2.577	344.083	1.348	1.235	13.17	4.998	1.004	0.206	79.547	81.855	1.049	1107.37	261.714	1058.06	1164.1	1940.44
044	04/13/16	0	2395.87	12.019	51.752	36.229	72.056	310.259	96.532	23.58	45.136	9.532	4.818	0.9	3.816	383.355	0.767	0.872	6.689	2.999	0.452	0.233	77.456	51.628	7.169	735.494	70.243	301.734	1519.55	5430.08
044	05/12/16	4	2379.29	17.695	50.946	23.483	106.658	307.082	62.91	22.617	28.354	6.881	2.542	0.052	0.401	58.364	0.539	0.863	8.1	2.131	0.606	1.293	65.218	168.085	0.167	1015.41	288.309	552.635	898.841	3124.98
044	05/13/16	4	1631.61	12.297	57.116	19.233	51.414	238.793	35.737	13.173	14.97	2.759	6.259	0.022	0.13	63.657	0.219	0.626	5.092	1.907	0.462	0.167	63.653	51.634	0.349	633.152	79.818	156.479	982.623	3553.19
044	05/14/16	4	2337.53	11.166	52.665	32.093	65.031	306.717	83.069	25.781	20.797	25.548	12.84	0.059	0.176	76.606	0.898	1.126	13.029	2.58	1.379	1.559	120.537	139.675	0.966	715.717	145.907	347.392	1463.01	3207.42
044	06/12/16	8	2295.87	12.953	55.541	31.506	76.57	328.313	82.772	26.056	44.453	9.207	5.076	0.139	1.171	624.198	1.552	1.313	12.692	4.544	1.717	0.555	137.358	66.379	0.933	500.861	185.276	463.305	3649.92	2628.57
044	06/13/16	8	1439.89	12.544	55.812	25.131	45.714	203.401	40.706	10.241	17.227	11.895	5.319	0.333	3.306	384.019	1.185	1.681	12.944	5.032	1.43	1.374	128.173	63.324	1.868	344.36	191.817	585.896	1911.33	1514.56
044	06/14/16	8	3308.67	12.719	60.415	24.025	106.215	504.528	89.169	26.141	35.831	11.764	5.555	2.158	0.567	826.546	0.44	0.902	16.385	3.948	1.439	3.467	156.65	1060.09	0.664	826.708	250.412	637.922	2942.37	2194.42
047	04/07/16	-1	1690.83	23.409	60.694	15.896	101.97	264.381	30.775	23.131	11.022	4.047	2.76	0.359	1.043	212.631	4.547	3.392	25.623	6.004	2.073	1.552	244.838	54.416	2.114	625.632	294.506	1015.59	2788.42	3234.72
047	04/08/16	-1	2205.5	21.431	49.91	25.312	121.777	283.603	63.926	14.93	22.302	4.286	1.518	0.047	1.358	639.542	3.821	4.32	37.902	4.812	0.938	1.027	203.92	4.416	1.22	1082.39	109.886	1086.05	1772.22	6207.32
047	04/09/16	-1	1839.87	20.236	52.207	27.557	95.464	246.292	57.78	14.145	28.201	9.662	3.331	0.269	2.407	192.015	4.347	4.541	35.157	5.556	1.243	0.186	216.923	46.045	0.839	1488.47	171.486	1316.52	2480.5	2921.3
047	05/10/16	0	2251.58	15.314	49.286	35.4	89.229	287.163	91.669	30.207	24.967	9.882	5.19	0.352	4.697	265.884	0.59	1.312	7.691	3.641	0.868	1.234	215.242	58.536	2.306	688.153	142.877	375.019	2788.97	7774.07
047	05/08/16	0	2170.31	15.199	54.346	30.455	87.661	313.451	78.068	25.93	38.74	17.509	3.018	0.642	1.37	516.393	1.662	1.162	10.096	3.779	0.843	1.432	97.769	147.475	1.242	929.14	246.978	628.992	2597.61	3175.32
047	05/09/16	0	1386.06	20.094	47.313	32.593	71.68	168.778	51.675	17.686	18.954	12.503	4.636	0.264	4.183	96.774	1.858	1.016	11.994	3.677	0.865	0.445	70.394	65.57	0.389	758.211	178.383	487.304	1504.47	2499.29
047	06/06/16	4	1630.04	15.394	58.082	26.524	63.786	240.663	48.845	16.008	13.717	8.377	3.595	0.034	0.708	52.499	0.803	0.878	8.442	1.941	0.267	0.938	55.096	18.708	0.39	384.825	332.303	683.977	1016.2	6911.43
047	06/05/16	4	1908.3	11.155	56.805	32.04	54.219	276.107	69.214	13.497	22.027	10.553	7.084	0.687	5.236	291.169	1	1.52	10.74	3.95	0.795	2.306	128.161	65.02	2.665	542.527	118.46	387.514	1915.54	2969.78
047	06/07/16	4	1357.69	17.683	65.473	16.844	61.764	228.683	26.148	24.434	6.914	1.834	1.338	0.09	0.696	58.657	1.347	0.888	7.787	2.925	0.897	0.156	87.054	62.049	0.322	423.044	156.52	365.825	1462.04	5870.7
047	04/01/16	8	1492.83	18.34	61.972	19.688	70.942	239.717	33.848	18.105	14.347	6.575	5.889	0.12	0.808	278.666	4.556	3.775	21.144	6.257	1.394	0.252	189.04	63.248	0.764	622.416	232.583	811.443	2529.93	2082.26
047	03/31/16	8	1650.2	18.85	57.022	24.129	79.964	241.897	45.492	16.634	16.205	15.822	5.223	0.3	3.455	113.93	4.551	3.595	22.167	5.202	1.282	1	173.577	58.832	0.346	670.179	216.77	991.675	2175.95	3513.33
047	04/02/16	8	2963.45	16.833	52.84	25.267	126.849	398.188	84.626	21	33.837	11.393	4.523	0.277	4.188	662.681	4.199	4.575	32.541	12.064	2.639	5.204	129.241	137.71	3.355	650.033	237.614	1137.75	1877.09	5107.03
048	03/31/16	-1	2098.02	11.133	46.353	42.514	59.234	246.631	100.535	16.692	30.578	3.736	1.9	0.044	0.734	3.041	0.499	0.202	4.01	0.508	0.251	0.216	0	2.24	0.291	1161.63	63.24	216.76	269.36	4033.39
048	04/01/16	-1	2175.94	10.359	59.39	30.251	57.555	329.961	74.697	13.651	21.328	3.736	1.9	0.044	0.734	3.041	2.631	2.756	8.55	2.021	0.818	0.216	122.4	102.24	0.291	634.469	68.915	314.822	1023.67	3142.88
048	04/02/16	-1	2118.26	20.019	22.109	57.872	104.369	115.265	134.095	8.65	63.884	9.878	2.137	0	0	0	0.787	0.962	7.446	0.934	0.382	2.055	2.4	121.92	0	1824.73	28.899	186.603	293.382	4739.9
048	04/08/16	0	2887.24	9.77	54.353	35.877	72.272	402.076	117.957	22.834	49.414	20.564	3.677	0.337	3.276	177.945	1.633	0.629	8.774	1.801	0.523	0.761	6.563	105.536	1.756	579.979	151.514	567.506	711.944	3070.46
048	04/09/16	0	2006.91	9.387	53.713	36.899	47.518	271.889	83.013	12.346	29.605	14.319	7.03	0.155	2.961	3.12	0.498	0.328	6.027	1.167	0.36	0.076	3.078	50	0.505	970.402	96.506	353.982	323.792	2902.39
048	04/07/16	0	2829.11	9.106	62.338	28.556	66.478	455.089	92.654	19.299	31.499	8.172	11.972	0.07	0.664	39.6	0.51	0.353	6.665	0.801	0.497	1.2	81.7	214.403	0.085	1396.41	70.785	360.955	1171.51	3305.41
048	05/09/16	4	2543.6	8.067	70.166	21.767	53.095	461.797	63.67	19.995	30.659	0.271	0.701	0.079	0.62	3.54	2.341	0.397	9.195	2.78	1.183	0	13.266	50	0.388	263.009	154.63	436.307	1147.73	2234.39
048	05/10/16	4	1861.4	10.561	64.176	25.263	50.515	306.95	53.703	14.787	26.509	12.499	2.593	0.183	2.415	145.621	2.63	1.038	14.503	2.614	1.033	0.31	4.8	200	1.697	892.507	148.925	530.164	832.102	3492.68
048	05/08/16	4	3746.73	12.344	61.692	25.964	119.198	595.738	111.434	33.691	52.469	0.353	1.346	0.124	1.218	3.54	2.883	0.65	13.241	2.477	1.136	0	30.666	200	0.494	1356.81	186.052	519.518	1023.09	4899.42
048	06/07/16	8	3582.08	19.785	57.284	22.931	179.138	518.665	92.276	17.696	36.637	19.824	5.211	0.281	2.87	0	1.305	1.292	24.257	3.955	1.766	4.578	27.96	611.152	0.578	2940.1	207.519	1072.31	1380.72	6748.59
048	06/08/16	8	3299.24	13.912	53.495	32.593	117.358	451.27	122.2	18.263	36.505	16.089	15.486	0.423	6.704	42.44	1.18	1.056	30.612	5.142	1.624	0.373	25.77	342.976	0.73	1733.89	261.57	1042.37	1831.64	7009.03
048	06/09/16	8	3638.72	10.882	58.527	30.591	102.48	551.185	128.043	17.514	40.367	1.284	0.766	0.038	0.73	0	0.439	0.24	12.679	1.823	0.812	0.006	167.186	300	0.232	1483.23	141.551	488.75	1042.19	4293.91
050	04/05/16	-1	1616.66	26.505	37.584	35.911	108.515	153.872	65.345	20.121	29.385	10.837	5.154	0.36	3.489	229.072	0.795	1.336	31.775	4.153	1.587	1.391	44.443	59.791	2.394	925.576	213.017	758.402	1913.94	2143.95
050	04/03/16	-1	1776.29	21.592	25.73	52.678	97.017	115.606	105.195	13.674	44.717	15.356	10.75	0.845	8.227	322.953	0.487	0.928	4.034	1.261	0.397	1.386	10.102	64.619	1.977	1043.01	65.593	591.774	672.946	5150.23
050	04/04/16	-1	2050.79	14.249	42.128	43.623	75.628	223.589	102.9	15.372	28.592	31.043	28.653	0.103	2.406	887.72	0.786	1.072	13.394	3.613	1.509	2.299	33.474	452.702	1.629	514.901	267.558	1011.87	2795.01	3391.66
050	04/12/16	0	1780.2	14.206	49.476	36.317	64.228	223.688	72.976	19.681	32.915	3.344	2.188	0.092	0.843	136.504	0.861	1.003	13.355	2.262	1.922	0.558	42.491	51.652	0.677	1331.75	127.719	472.687	2724.29	2325.8
050	04/11/16	0	1715.99	19.41	45.877	34.713	84.831	200.5	67.427	19.49	21.869	8.08	6.857	0.428	5.502	455.17	0.576	0.946	19.336	3.344	1.062	0.906	37.307	59.515	3.094	838.479	106.417	349.816	1370.96	3437.62
050	04/10/16	0	1894.27	18.003	37.86	44.137	85.895	180.636	93.593	21.236	46.6	5.131	6.843	0.258	5.465	116.568	0.161	0.265	3.421	0.326	0.275	0.14	13.723	31.566	2.359	830.803	44.731	208.975	986.864	3602.01
050	05/12/16	4	1271.2	19.311	50.62	30.069	61.552	161.351	42.597	16.672	8.172	5.42	3.817	0.039	2.186	0.839	0.247	0.144	4.94	0.5	0.17	0	35.695	0	1.488	362.61	100.397	333.269	445.063	2607.33
050	05/13/16	4	2189.79	23.356	48.258	28.387	129.235	267.027	69.811	21.644	21.903	16.665	10.036	0.319	9.482	65.69	0.443	0.591	41.504	2.937	1.959	0.736	25.301	18.416	2.871	598.212	230.97	346.537	1748.59	2068.46
050	05/14/16	4	1167.02	16.096	45.765	38.14	47.356	134.647	49.873	12.167	17.615	0.146	0.34	0.006	0.136	960.815	0.368	0.754	7.024	1.531	0.8	0	33.423	0	0.745	746.029	46.548	175.7	712.514	2217.62
050	06/12/16	8	1434.95	19.929	46.754	33.317	73.641	172.766	54.718	20.892	10.459	11.026	2.125	0.108	1.451	6.055	0.117	0.351	2.14	1.932	0.252	0	7.612	0	1.729	17.078	40.918	58.793	658.763	2779.3
050	06/13/16	8	1689.71	10.841	51.878	37.281	46.644	223.206	71.291	17.093	13.825	7.02	4.51	0.052	3.935	0	0.375	0.563	12.36	1.051	0.742	1.506	19	180	2.633	289.041	177.09	304.616	677.472	4156.6
050	06/14/16	8	1504.13	24.003	47.213	28.783	99.42	195.552	52.985	26.558	11.473	11.219	5.479	0.061	3.863	900.054	0.558	0.875	9.393	2.733	0.62	0.9	20.946	0	3.484	486.602	179.691	587.288	1409.04	3448.98
052	04/01/16	-1	757.394	25.46	34.222	40.318	48.625	65.361	34.224	11.256	15.454	10.476	5.703	2.794	2.651	175.56	0.548	0.976	10.775	3.877	0.897	3.646	24.57	333.996	0.733	596.405	92.1	627.769	1134.56	1560.54
052	04/02/16	-1	927.49	26.581	34.761	38.659	60.124	78.628	38.864	8.04	16.293	8.815	3.764	0.119	1.388	15.728	1.204	1.17	11.925	2.992	0.845	0.624	17.427	26.108	0.344	620.149	95.242	413.601	1393.81	1867.59
052	03/31/16	-1	831.062	22.559	37.749	39.692	48.217	80.683	37.705	9.343	16.246	7.765	4.268	0.183	2.065	305.616	0.217	0.302	16.376	1.888	0.993	0.363	68.397	9.072	1.035	468.28	89.562	158.703	1311.09	665.952
052	04/07/16	0	2188.17	16.324	42.219	41.458	89.766	232.169	101.326	13.204	40.19	25.618	19.954	0.11	0.953	357.204	0.307	0.92	17.05	3.3	1.046	2.479	23.97	108.403	0.866	1449.93	129.278	621.419	1410.64	2660.45
052	04/08/16	0	2159.97	12.228	46.022	41.75	66.469	250.173	100.866	10.04	24.187	43.235	27.836	0	5.157	215.699	0.377	0.996	8.358	2.816	0.652	4.99	11.477	93.454	0.136	585.411	157.831	956.463	1087.89	2148.11
052	04/09/16	0	1876.93	14.75	32.907	52.343	72.196	161.066	113.865	12.884	29.364	37.431	23.692	2.655	11.779	449.419	0.933	1.196	24.336	6.098	2.032	3.982	73.663	374.631	4.841	625.266	267.121	1070.57	2999.16	2353.88
052	05/10/16	4	977.239	21.043	50.983	27.974	52.261	126.619	30.878	12.157	17.105	7.08	1.646	0.445	1.149	678.717	0.735	1.91	9.628	5.256	1.259	2.395	132.081	137.251	3.337	868.474	197.967	676.257	2567.57	1410.83
052	05/08/16	4	1293.39	12.142	62.224	25.634	41.333	211.825	38.784	20.805	8.048	2.749	0.613	0.133	0.466	262.588	0.419	1.469	10.151	4.062	1.272	1.632	119.29	132.865	1.082	611.321	153.716	410.068	2153.61	1392.84
052	05/09/16	4	1157.78	21.638	52.177	26.185	62.511	150.735	33.621	12.994	7.472	3.629	0.733	0.094	0.632	152.474	1.065	0.755	5.308	1.797	0.653	1.811	100.768	106.612	0.355	388.855	61.099	479.68	1000.46	6056.62
052	06/08/16	8	975.532	32.683	31.962	35.354	82.303	80.487	39.568	10.791	13.423	15.014	5.773	0.295	5.454	52.092	0.409	0.677	21.712	2.642	1.746	2.974	32.572	210.603	4.269	597.758	154.193	486.514	2003.11	507.72
052	06/06/16	8	1182.36	14.606	48.514	36.879	44.884	149.079	50.367	15.04	9.911	0.402	0.729	0.071	0.657	3.574	0.109	0.163	5.899	0.533	0.511	0	13.282	100	0.418	402.172	58.74	93.133	533.257	1735.41
052	06/07/16	8	1492.38	13.684	55.51	30.806	51.717	209.791	51.746	12.924	9.606	10.398	5.969	0.07	4.888	252.13	0.231	0.593	6.192	1.736	0.778	1.302	26.503	126.889	2.864	747.843	126.229	408.377	1481.67	2239.71
053	04/03/16	-1	1612.49	19.726	42.326	29.906	78.891	169.276	53.158	9.47	19.121	3.027	2.017	0.169	1.52	66.116	0.721	0.849	26.072	3.312	1.534	0.78	96.605	44.029	0.347	655.291	139.074	622.042	1830.48	2442.27
053	04/04/16	-1	1054.36	19.616	47.643	32.742	51.029	123.941	37.856	4.628	7.798	1.221	1.357	0.12	1.211	44.523	0.212	0.228	2.391	0.778	0.178	0	18.1	12.262	0.299	84.414	43.167	114.058	283.367	1004.27
053	04/05/16	-1	1530.58	13.116	61.771	25.113	51.087	240.599	43.475	7.442	15.665	2.812	1.175	0.104	1.039	1.19	0.7	0.437	4.923	0.975	0.341	0.236	105.043	8.647	0.276	210.663	65.015	206.85	1182.37	2623.39
053	04/12/16	0	1279.92	12.412	77.329	10.259	39.423	245.613	14.482	18.028	6.282	2.021	1.235	0.171	1.044	57.171	0.363	0.387	3.79	0.749	0.476	0.061	37.768	12.5	0.371	175.57	66.486	116.863	706.824	2012.93
053	04/10/16	0	1920.46	18.057	53.028	22.262	87.28	256.317	47.825	21.184	7.469	0.04	0.15	0	0.002	0	2.087	2.868	5.792	2.169	0.687	0	61.35	56.25	0.124	711.942	51.019	79.656	769.675	3225.46
053	04/11/16	0	1298.17	16.033	67.287	16.681	53.917	226.283	24.932	19.305	8.491	7.342	3.786	0.266	3.487	81.463	1.05	0.686	12.77	1.905	0.916	1.152	36.821	22.274	1.509	550.441	139.322	542.294	1151.88	2155.27
053	05/10/16	4	1360.72	9.049	61.003	23.058	31.68	213.558	35.876	12.47	5.793	13.605	9.341	0.202	9.014	53.26	0.637	0.545	22.172	7.46	1.892	3	89.105	6.25	4.547	220.439	194.285	392.063	1339.46	2030.23
053	05/09/16	4	1586.83	13.862	45.129	34.974	55.4	180.367	62.125	12.233	24.441	8.035	1.917	0.079	0.21	44.092	0.263	0.376	4.42	1.523	0.958	0.649	11.512	60.393	0.135	181.862	95.464	207.151	1347.2	2848.03
053	05/08/16	4	1937.1	22.481	28.695	45.253	111.72	142.604	99.951	6.34	44.182	18.203	6.875	0.101	0.482	257.36	0.57	0.764	28.11	8.186	2.927	5.808	142.032	66.918	0.911	1596.65	149.701	802.903	2259.3	2003.83
053	06/05/16	8	977.835	16.846	62.412	14.246	41.703	154.499	15.674	9.866	5.039	6.681	2.162	0.121	1.463	74.287	1.075	0.684	13.331	2.901	0.913	0.552	80.004	23.045	1.02	181.77	165.923	580.79	1523.55	702.896
053	06/06/16	8	1326.58	13.989	46.878	39.134	46.676	156.418	58.034	4.922	17.607	8.983	4.703	0.32	4.351	231.387	0.526	1.055	5.061	2.434	0.45	1.127	1.331	52.943	1.639	359.957	107.195	481.091	1020.69	3537.83
053	06/07/16	8	947.036	20.731	50.82	28.449	48.685	119.349	29.695	9.662	10.391	9.633	2.506	0.16	2.233	54.679	1.593	0.687	9.822	2.343	0.684	0.864	10.221	31.401	0.48	183.371	74.154	383.333	841.54	1744.23
057	04/03/16	-1	1616.73	15.458	63.105	21.438	65.396	266.977	40.31	39.699	13.102	8.305	3.007	0.007	0.113	253.513	0.562	0.794	8.039	2.506	0.327	0.611	21.78	128.31	0.062	1018.98	71.728	298.842	588.047	4051.71
057	04/05/16	-1	2873	11.258	62.095	26.647	82.055	452.606	86.325	24.78	29.018	0.444	0.306	0.051	0.199	644.486	0.407	0.752	4.707	2.765	0.938	0.537	25.332	48.77	0.577	556.882	115.923	350.677	1363.73	4283.14
057	04/04/16	-1	1923.99	17.244	62.679	20.077	83.189	302.374	43.046	17.019	21.383	0.832	1.065	0.098	0.528	644.486	0.439	0.947	5.275	2.921	0.991	0.573	39.779	48.77	0.616	1050.5	142.195	439.123	1407.88	3549.45
057	04/10/16	0	1385.59	15.948	38.165	45.887	56.43	135.041	72.161	11.78	20.659	8.009	7.895	0.001	0.3	161.943	0.414	1.097	6.721	3.847	0.848	2.426	57.388	64.458	0.083	482.302	134.228	593.705	1561.29	3028.19
057	04/11/16	0	1676.53	13.903	61.021	25.076	60.496	265.526	48.496	19.655	12.635	8.831	2.363	0.061	0.498	795.369	0.727	1.225	11.634	3.74	1.116	2.508	45.972	82.386	0.396	605.643	133.903	686.528	1613.39	3086.55
057	04/12/16	0	1689.43	18.845	52.585	28.569	81.321	226.913	54.792	19.887	19.73	14.369	4.765	0.339	3.995	1011.66	0.83	1.939	25.902	6.274	2.45	1.797	55.273	130.159	2.356	913.399	275.581	929.93	3680.86	1837.89
057	05/08/16	4	2270.93	13.643	49.887	25.427	79.459	290.561	65.821	17.495	9.15	30.875	14.811	0.082	2.943	107.837	1.048	0.974	16.104	3.51	1.621	0.543	57.282	48.77	1.586	701.473	230.571	824.647	3736.2	3327.57
057	05/09/16	4	2409.22	23.876	53.404	22.72	145.287	324.969	61.446	24.712	28.901	1.13	2.32	0.143	2.097	902.257	0.925	0.835	9.278	4.612	1.407	0.537	20.346	48.77	1.385	1047.88	247.109	694.444	1975.45	4738.13
057	05/10/16	4	1916.3	21.299	51.665	27.036	103.097	250.084	58.164	15.411	14.785	0.666	0.702	0.051	0.148	785.34	0.284	0.723	3.7	2.994	0.952	0.537	54.225	49.842	0.414	866.656	117.22	354.284	1793.86	2163.48
057	06/12/16	8	1664.84	8.509	57.867	26.041	36.086	245.41	49.084	9.052	11.871	14.302	4.733	0.001	0.009	81.279	0.625	1.343	9.716	4.002	0.491	2.074	23.652	66.253	0.307	305.454	135.695	439.24	1470.91	2094.83
057	06/13/16	8	1206.45	17.92	55.186	26.894	54.27	167.129	36.199	7.237	11.696	5.692	6.108	0.072	0.534	93.807	0.54	1.129	5.099	3.227	0.38	0.731	24.909	66.711	0.337	678.571	96.608	473.555	1338.99	2259.97
057	06/14/16	8	1682.02	13.767	55.69	30.543	57.438	232.348	56.635	15.429	17.513	11.528	10.977	0.045	0.12	854.586	0.837	1.255	10.614	4.831	1.588	3.043	52.979	131.557	0.402	921.497	182.369	751.127	2575.76	3261.66
058	04/10/16	-1	1171.91	13.866	75.189	10.945	41.606	225.61	14.596	22.241	5.429	5.169	1.919	0.146	1.509	100.173	0.473	0.622	4.503	1.207	0.287	0.583	18.619	13.072	0.821	245.929	138.158	441.804	1153.53	1650.32
058	04/11/16	-1	1625.97	11.509	57.276	31.215	47.547	236.627	57.315	11.187	12.774	13.522	20.963	0.159	2.775	169	1.004	1.06	5.108	3.054	0.543	1.324	25.6	118.667	1.413	708.788	195.481	609.589	1669.96	1255.92
058	04/12/16	-1	2120.92	13.932	56.536	29.531	75.073	304.635	70.722	13.921	27.721	5.359	6.049	0.148	4.841	191.966	0.744	0.725	8.027	1.366	0.191	0.265	46.76	75	2.209	931.959	193.731	478.162	1166.17	3572.56
058	04/17/16	0	1073.19	8.42	69.24	22.34	23.243	191.124	27.407	11.938	8.723	10.36	6.174	0.53	5.574	512.182	0.741	1.044	8.841	2.636	0.816	0.433	49.268	74.249	2.536	315.065	133.106	427.427	1640.1	1487.46
058	04/18/16	0	1772.2	16.153	49.643	34.205	70.91	217.931	66.737	10.993	33.745	6.012	3.011	0.173	2.834	228.14	0.995	1.005	6.814	3.053	0.515	1.31	58.006	101.627	1.645	1332.96	72.605	401.601	1170.61	5979.06
058	04/19/16	0	2397	11.134	61.929	20.392	68.39	380.393	55.67	17.725	14.157	12.017	5.524	0.241	5.123	713.54	1.144	0.868	21.444	3.207	1.698	0.886	252.53	116.894	2.406	659.345	249.357	717.1	3062.82	4783.53
058	05/16/16	4	1429.3	13.8	47.902	38.299	50.949	176.858	62.845	11.239	22.858	18.152	8.077	0.342	5.744	357.186	0.616	0.982	12.459	2.98	0.833	0.546	141.751	175.095	3.939	1054.57	202.237	775.796	1719.17	1470.47
058	05/17/16	4	1863.3	12.363	53.493	34.144	58.048	251.155	71.248	6.955	27.829	11.125	4.072	0.224	3.848	147.843	0.3	0.47	5.434	0.869	0.378	0.463	205.398	115.015	1.672	1050.2	98.354	501.705	820.704	2563.75
058	05/15/16	4	1981.24	10.247	57.334	32.418	51.95	290.671	73.046	20.051	25.164	5.426	2.081	0.19	1.84	241.099	0.503	1.124	5.34	2.465	0.311	1.238	14.817	199.186	1.578	961.516	67.673	359.905	775.78	3917.87
058	06/12/16	8	1977.03	11.597	58.856	29.547	58.7	297.919	66.472	12.4	17.087	7.164	2.705	0.07	1.182	15.05	0.895	0.995	12.976	2.079	0.34	0.609	33.129	19.411	0.3	506.69	169.87	460.713	1685.93	3620.94
058	06/13/16	8	1514.13	11.393	62.061	26.546	42.782	233.038	44.302	7.587	19.678	7.988	2.419	0.154	2.106	238.474	0.268	0.466	3.452	2.011	0.521	0.797	51.264	59.965	1.065	817.148	75.662	350.76	1098.74	3403.24
058	06/14/16	8	2035.92	10.273	63.324	26.403	52.497	323.603	59.968	14.261	19.964	10.942	2.229	0.054	0.663	19.25	0.562	0.446	10.569	1.388	0.454	0.748	46.165	59	0.849	730.922	111.304	335.424	1183.04	2676.55
059	04/03/16	-1	1438.84	17.312	42.989	39.699	64.859	161.058	66.104	13.261	27.224	11.997	2.53	0.205	1.244	500.854	0.342	0.843	3.459	2.412	0.619	0.091	56.378	158.083	1.409	781.032	103.711	152.712	1431.52	2086.42
059	04/04/16	-1	2699.21	15.297	21.832	62.87	107.313	153.155	196.019	32.167	73.973	66.694	35.471	2.332	32.568	2151.1	1.83	2.387	18.031	7.239	2.15	1.314	490.52	142.489	8.96	1094.69	912.386	2273.63	4390.65	1870.04
059	04/05/16	-1	1682.91	11.919	49.003	39.078	51.31	210.952	74.768	28.705	34.204	18.389	4.592	0.632	3.263	781.625	1.699	1.894	13.756	5.335	2.495	0.873	216.255	58.158	3.583	636.745	351.208	943.749	3672.15	1505.09
059	04/10/16	0	2184.49	19.515	43.698	36.787	107.395	240.474	89.974	36.477	25.202	30.618	13.934	0.433	9.367	377.522	1.025	1.792	23.858	2.496	1.338	4.191	29.973	56.777	5.818	462.556	444.279	1482.52	2198.6	4501.55
059	04/11/16	0	2269.69	22.98	45.729	31.292	131.786	262.251	79.758	28.69	22.497	18.123	10.511	0.576	8.127	1004.61	1.553	2.188	48.959	6.913	2.554	3.139	94.006	50.642	2.859	1118.83	405.299	1728.35	3291.43	2775.79
059	04/12/16	0	2225.26	18.528	47.803	33.67	104.583	269.834	84.469	10.253	11.871	0.343	0.53	0.026	0.504	6.547	0.14	0.466	1.497	1.385	0.118	0	11.462	12.5	0.367	233.904	52.52	128.351	469.896	1203.8
059	05/13/16	4	2394.09	16.052	39.26	35.545	97.045	237.354	95.507	16.697	43.598	20.634	3.152	0.095	0.718	140.307	0.55	0.947	12.382	2.693	0.73	3.021	75.747	53.54	2.365	1023.89	121.441	458.241	1662.98	3174.88
059	05/14/16	4	2034	17.757	53.549	28.694	92.701	279.548	66.575	7.08	26.665	0.13	0.164	0.09	0.03	432.7	0.094	0.391	1.947	1.472	0.103	0.41	11.57	418.75	0.427	2095.63	29.537	68.662	423.976	3369.63
059	05/12/16	4	2202.99	25.377	29.311	45.312	141.101	162.978	111.976	21.557	36.081	29.744	7.799	0.268	1.355	255.593	0.647	1.331	13.243	2.532	0.879	3.998	15.745	57.341	1.283	1219.87	204.36	1338.21	1591.47	4388.89
059	06/13/16	8	2179.67	15.366	51.432	33.203	86.274	288.779	82.856	36.284	27.11	18.143	4.532	0.378	3.961	1989.02	0.668	1.416	13.84	5.855	1.431	1.423	90.827	12.5	4.204	428.646	209.03	729.925	2503.79	3627.1
059	06/14/16	8	1635.65	15.834	48.305	35.862	67.486	205.882	67.932	36.312	14.855	22.56	7.517	0.718	6.305	940.065	0.966	1.297	32.289	6.211	2.034	0.386	169.93	21.572	4.644	536.939	271.641	838.242	3060.33	1969.31
059	06/12/16	8	2019.8	15.598	59.387	18.737	79.911	304.243	42.662	34.565	19.555	9.551	4.675	0.252	1.325	1032.25	1.249	0.996	15.734	6.684	2.109	0.047	395.906	28.606	5.679	334.966	546.79	1410.77	4189.81	8533.14
062	04/03/16	-1	920.29	34.579	34.04	31.382	79.959	78.712	32.252	7.968	9.134	11.556	7.876	0.396	7.273	163.275	0.541	0.76	35.823	4.503	2.238	1.365	29.625	44.416	1.808	81.608	170.736	375.229	2463.12	735.016
062	04/04/16	-1	1112.28	35.058	35.534	29.409	95.182	96.474	35.487	6.114	12.208	11.721	6.683	0.596	5.715	615.548	0.775	1.358	43.682	6.399	2.102	0.991	103.91	89.313	0.877	388.271	174.829	237.652	2074.36	583.455
062	04/05/16	-1	1500.2	26.582	25.412	48.006	101.102	96.649	81.148	18.513	21.585	30.653	18.153	0.621	17.27	1240.54	1.251	1.54	44.517	6.692	2.212	1.422	93.153	50.713	8.933	575.482	340.738	696.149	2477.26	3078.39
062	04/10/16	0	936.758	23.427	44.99	31.583	53.597	102.928	32.113	9.171	13.007	8.823	2.884	0.163	2.627	162.747	0.75	1.531	10.522	5.079	1.107	3.602	24.741	96.006	1.403	357.009	139.847	673.091	1980.27	893.649
062	04/11/16	0	1734.13	19.311	49.646	31.044	89.764	230.769	64.134	28.091	24.176	6.584	3.513	0.257	3.239	574.543	0.374	0.506	5.702	1.028	0.441	0.501	33.706	28.402	1.519	1484.37	118.581	369.474	718.015	3697.59
062	04/12/16	0	1318.31	26.804	34.174	39.022	89.117	113.623	57.663	13.665	15.46	17.981	11.023	0.88	9.851	1394.35	0.846	1.387	38.907	5.13	1.907	1.526	55.237	46.818	1.976	479.235	206.193	527.767	2219.23	4308.56
062	06/13/16	4	1577.1	18.306	50.118	31.576	70.155	192.071	53.781	15.891	11.476	3.063	1.513	0.014	1.499	109.409	0.052	0.1	1.364	0.156	0.117	0.099	90.468	0	0.955	634.195	43.506	105.655	448.144	3735.77
062	06/12/16	4	937.084	19.025	42.62	38.356	45.748	102.487	40.992	22.63	15.518	4.887	0.728	0.296	0.433	134.084	0.312	1.145	2.886	1.045	0.456	1.753	1.048	12.115	0.255	1033.11	22.697	647.51	961.405	3003.45
062	06/14/16	4	1417.14	28.747	30.872	40.381	96.897	104.06	60.494	13.02	17.947	6.828	1.537	0.099	1.438	21.882	0.115	0.196	6.396	0.785	0.517	1.031	39.366	11.194	1.369	604.691	46.871	246.885	618.683	3617.99
071	04/10/16	-1	2359.31	16.851	42.886	33.815	99.616	253.517	88.843	19.765	36.436	20.12	8.062	0.195	1.748	306.424	1.486	2.722	25.064	4.256	1.201	4.206	1.026	126.766	1.322	1257.95	481.402	1561.59	2068.05	3084
071	04/11/16	-1	995.761	39.949	20.739	39.312	98.8	51.292	43.211	6.658	12.739	4.546	2.393	0.14	1.957	381.592	0.693	1.323	35.082	3.133	1.709	1.889	181.481	98.372	1.022	690.441	234.976	558.405	1877.03	1189.89
071	04/12/16	-1	1536.81	13.827	55.83	30.343	54.109	218.477	52.773	29.491	18.157	5.449	2.378	0.161	2.18	217.712	0.822	1.444	10.399	2.504	0.913	1.505	100.101	95.646	1.836	738.842	174.928	751.235	1351.35	5187.25
071	05/08/16	0	2184.64	15.305	54.628	25.933	87.853	313.572	66.159	13.725	25.128	1.502	2.02	0.134	0.886	4.34	0.664	0.534	7.124	0.694	0.651	0.068	12.706	0	0.294	657.4	168.37	295.55	614.915	5174.64
071	05/09/16	0	987.092	12.663	54.12	33.217	33.16	141.725	38.661	13.414	10.225	5.504	3.151	0.165	1.893	305.724	0.355	0.67	2.55	1.944	0.85	0.972	100.012	0	1.354	122.443	181.902	452.453	1226.61	1511.15
071	05/10/16	0	791.005	24.442	49.399	26.159	49.888	100.826	23.73	10.617	4.289	4.246	2.571	0.099	1.009	243.807	0.431	0.453	2.46	1.326	0.482	0.486	160.784	6.804	0.858	132.431	225.481	866.09	1573.41	3056.2
071	06/18/16	4	1831.4	12.762	45.693	36.44	59.332	212.425	75.292	16.033	26.004	5.893	1.24	0.316	0.925	215.75	0.409	0.426	5.056	0.558	0.222	0.316	3.6	0	0.382	261.398	44.676	177.416	234.333	2691.33
071	06/16/16	4	1234.66	30.668	42.835	26.497	94.044	131.353	36.112	11.513	8.378	11.115	6.119	0.386	5.525	220.224	1.16	1.531	40.195	3.515	1.559	1.957	12.426	101.062	0.943	467.531	165.723	611.272	1163.55	1748.63
071	06/17/16	4	1895.25	18.796	34.814	38.252	88.416	163.766	79.974	8.144	30.541	21.709	3.787	0.06	3.295	258.393	0.996	1.815	17.199	1.881	0.819	4.67	1.026	170.646	0.773	604.228	143.041	877.026	1081.08	3320.86
071	04/03/16	8	1977.15	16.664	33.793	49.543	86.934	176.291	114.869	10.25	31.517	36.062	15.161	0.014	0.269	1.134	0.66	0.422	7.599	1.223	0.453	0.743	23.088	0	0.085	300.7	222.419	530.723	1441.53	3417.68
071	04/04/16	8	986.954	20.784	45.549	33.667	52.715	115.529	37.951	16.552	13.863	4.1	1.648	0.144	1.487	817.635	0.605	1.158	8.269	1.899	0.392	1.11	29.979	52	1.904	594.613	42.154	513.508	790.124	3270.76
071	04/05/16	8	1150.48	15.2	36.832	47.969	44.814	108.593	62.857	19.344	11.814	34.915	7.316	0.218	2.054	32.448	0.591	0.812	10.404	2.363	0.905	0	30.545	0	2.748	316.984	83.681	396.937	1970	1025.2
072	04/03/16	-1	1954.49	15.241	38.884	45.876	73.5	187.522	98.329	12	30.192	0.002	0.009	0	0	0	0	0.033	0	0.026	0	0	8.775	6.25	0	358.75	7.094	2.365	87.489	2820.91
072	04/04/16	-1	2922.54	13.538	49.491	36.971	97.827	357.621	118.736	5.04	63.301	16.539	2.301	0.487	1.404	433.146	0.577	1.233	9.514	4.903	0.476	0.974	0.475	30.718	1.006	1906.6	146.95	892.73	590.859	3816.13
072	04/05/16	-1	2808.36	18.667	37.779	43.554	133.134	269.445	138.06	22.669	45.482	40.284	28.662	0.694	27.756	176.916	1.377	1.402	57.013	2.654	1.247	4.964	2.763	68.78	14.343	1028.98	710.989	1715.79	1890.02	5662.97
072	04/10/16	0	1523.01	21.311	33.676	45.013	81.704	129.108	76.7	12.2	33.488	17.642	7.604	0.37	7.015	269.502	0.76	1.859	8.471	2.917	1.067	2.411	12.858	71.556	2.814	1225.99	160.279	1015.33	1372.69	3054.37
072	04/11/16	0	1827.6	14.121	53.058	32.55	66.647	250.411	68.277	28.616	21.848	21.142	12.68	1.973	3.991	671.218	1.674	1.923	18.598	3.171	1.599	2.289	202.611	17.812	6.587	591.355	222.846	776.488	2874.46	4749.69
072	04/12/16	0	807.534	24.594	17.023	58.383	50.146	34.708	52.907	6.096	17.948	20.919	7.194	0.329	6.857	188.102	1.056	0.932	8.655	0.671	0.597	1.408	4.887	20.04	10.671	365.319	152.466	593.109	1286.26	1612.02
072	05/15/16	4	2721.19	12.052	39.488	48.459	82.255	269.501	146.99	15.439	59.208	23.651	4.496	0.056	3.726	163.956	0.791	0.439	7.05	1.404	0.826	1.089	199.738	80.539	1.58	483.635	52.812	367.022	803.867	1769.14
072	05/16/16	4	1435.59	18.813	42.143	39.044	68.519	153.49	63.2	10.347	16.912	9.776	8.608	3.931	4.266	149.063	1.316	0.567	16.39	3.889	1.644	5.249	81.296	475.164	1.172	355.055	87.094	684.085	1116.73	1263.75
072	05/17/16	4	2290.86	23.164	32.836	44	133.463	189.187	112.67	11.066	22.241	42.022	38.568	8.325	25.597	270.374	1.133	0.957	45.831	6.302	3.057	7.97	160.711	759.564	4.563	252.63	245.972	916.252	2619.17	2251.56
072	06/12/16	8	2086.46	13.716	39.403	46.881	71.956	206.72	109.31	14.007	44.446	18.196	5.482	0.608	4.816	482.208	1.961	1.597	18.024	1.688	1.196	2.877	91.235	59.05	2.626	307.139	130.836	473.699	1038.77	4133.22
072	06/13/16	8	1780.73	11.643	50.364	37.993	52.25	226.008	75.775	14.96	21.305	16.818	7.671	0.591	5.241	389.672	1.583	1.343	11.607	2.053	0.912	2.566	102.073	71	3.178	261.223	253.802	721.348	1610.49	1930.59
072	06/14/16	8	2806.36	16.082	44.811	39.106	112.935	314.677	122.05	24.006	44.413	17.443	7.352	0.834	6.424	1019.61	1.307	1.328	11.653	3.869	1.152	1.184	182.061	79.936	5.497	661.807	169.594	620.389	1818.64	4117.64
077	04/03/16	-1	1178.21	21.153	48.08	30.767	61.807	140.484	39.954	5.4	6.297	6.155	14.849	0.3	2.545	0	0.63	0.819	6.243	1.581	0.089	0.028	12	0	0.375	276.338	49.547	154.267	409.886	4324.58
077	04/04/16	-1	978.043	19.774	48.285	31.94	47.709	116.497	34.25	4.779	6.705	3.792	7.091	0.118	0.969	0	0.915	1.315	6.454	2.324	0.393	0.54	14.4	0.84	0.285	189.561	49.527	178.954	457.499	2915.34
077	04/05/16	-1	919.749	14.61	65.578	19.812	33.853	151.951	20.403	9.053	5.141	0.109	0.091	0.032	0.059	3.54	0.103	0.445	1.688	1.595	0.438	0	10.266	0	0.165	55.358	46.047	40.147	654.166	1450.64
077	04/10/16	0	1202.53	20.679	30.706	48.615	61.707	91.63	64.476	4.724	11.963	11.692	19.59	0.145	1.443	0	0.901	0.735	6.324	1.705	0.339	0.354	29.76	106.72	0.263	609.858	48.307	210.027	540.806	3642.9
077	04/11/16	0	1318.37	26.668	36.234	37.098	91.348	124.115	56.478	17.555	21.414	0.157	0.346	0.038	0.305	0	0.404	0.486	4.297	1.954	0.378	0	39.25	0	0.124	586.804	58.076	120.853	674.256	4195.85
077	04/12/16	0	1755.43	28.301	31.871	39.828	126.057	141.957	78.843	14.75	34.542	1.47	0.443	0.053	0.381	0	1.233	0.631	8.143	2.365	0.857	0.84	25.45	108.96	0.384	1299.54	58.227	308.347	1033.73	5724.43
077	05/12/16	4	1858.55	16.238	64.256	19.506	75.254	297.786	40.177	14.324	18.197	5.655	4.833	0.434	4.379	34.2	1.684	2.494	21.12	3.985	1.468	2.595	30.728	24.26	1.285	1300.11	174.347	1034.13	2156.61	4147.85
077	05/13/16	4	1524.92	18.521	56.892	24.587	69.966	214.922	41.281	9.75	10.263	16.003	11.499	0.705	10.633	25.99	1.587	1.169	22.556	4.051	0.967	1.599	13.543	43.332	2.96	289.996	172.453	1088.71	1474.39	2277.3
077	05/14/16	4	1183.56	17.197	54.936	27.867	50.571	161.553	36.423	6.65	11.713	14.099	7.046	0.341	4.12	251.284	1.052	1.659	10.754	3.036	0.397	2.797	16.214	59.594	1.206	796.054	106.39	915.583	1207.46	2753.5
077	06/07/16	8	1505.46	18.073	45.065	36.862	67.919	169.351	61.567	15.379	19.966	15.997	9.238	0.384	4.824	259.74	1.652	1.702	9.56	4.148	1.572	3.995	53.36	60.13	2.243	554.7	127.876	597.468	1693.78	3541.78
077	06/05/16	8	1454.27	15.907	46.624	37.469	57.903	169.715	60.617	9.29	16.877	13.885	6.97	0.319	5.591	286.102	1.244	2.237	15.362	2.861	1.632	1.185	16.468	52.804	3.171	767.945	42.337	408.585	539.928	2493.16
077	06/06/16	8	1884.43	17.97	40.198	41.832	84.191	188.328	87.104	9.398	27.438	24.062	17.497	0.631	7.909	67.671	1.45	1.737	18.57	3.259	0.797	2.636	14.835	42.061	9.088	975.346	198.066	1052.26	1458.6	4516.51

## Sheet: ADVERSE EVENTS
		Adverse Events Subject Number	Adverse Events Description	Adverse Events Body System	Adverse Events Adverse Event Type	Adverse Events Start Date and Time	Adverse Events End Date and Time	Adverse Events Treatment Required	Adverse Events Alt Relationship	Adverse Events Severity	Adverse Events Action Taken	Adverse Events Serious?	Adverse Events Outcome
	Adverse Events-1-001-16-PHX-0001	001	Subject experienced different stool color (purple) without unusual odor during visit 2 to visit 3.	Gastrointestinal Disorders	Gastrointestinal Disorders - Other	2016-04-10 07:00:00	2016-04-12 08:15:00	None	Possible	Mild	None	No	Recovered
	Adverse Events-1-003-16-PHX-0001	003	Participant experienced acute bronchitis which required antibiotic intake for 10 days	Infections and Infestations	Bronchial Infection	2016-04-21 12:00:00	2016-04-30 12:00:00	Medication	Unrelated	Moderate	None	No	Recovered
	Adverse Events-1-004-16-PHX-0001	004	Participant expereinced vomiting for one time after consuming IP, later at lunch time they consumed extra sachet of IP.	Gastrointestinal Disorders	Vomiting	2016-05-06	2016-05-06	None	Possible	Mild	None	No	Recovered
	Adverse Events-1-005-16-PHX-0001	005	Subject sufferes from migraines in medical history. But for one day he felt dizzy with his symptoms while he has not experienced before.	Nervous System Disorders	Dizziness	2016-04-12	2016-04-12	None	Unlikely	Moderate	None	No	Recovered
	Adverse Events-1-007-16-PHX-0001	007	subject experienced different stool color (orange, red-ish, grey-ish, green-ish) without unusual odor during v2 to v3	Gastrointestinal Disorders	Gastrointestinal Disorders - Other	2016-04-10 11:40:00	2016-06-07 12:00:00	None	Possible	Mild	None	No	Recovered
	Adverse Events-1-013-16-PHX-0001	013	on IP, subject felt bloated for a week when vomiting started and associated with nausea. Subjec could not eat anything and went to Emergency Department but there was no poisoning. Test article discontinued on May 15, 2016	Gastrointestinal Disorders	Vomiting	2016-05-13	2016-06-01	None	Possible	Severe	Discontinued Permanently	No	Recovered
	Adverse Events-1-017-16-PHX-0001	017	subject experienced changing in stool color (dark brown, green-brown, dark brown, light brown, orange brown) but without any strange odor	Gastrointestinal Disorders	Gastrointestinal Disorders - Other	2016-04-11	2016-05-04	None	Possible	Mild	None	No	Recovered
	Adverse Events-1-018-16-PHX-0001	018	subject experienced different stool color (rusty-orange) without unusual odor during v2 to v3	Gastrointestinal Disorders	Gastrointestinal Disorders - Other	2016-04-09 12:01:00	2016-06-11 12:00:00	None	Unlikely	Mild	None	No	Recovered
	Adverse Events-1-020-16-PHX-0001	020	Subject experienced rumbly and bubbly stomach after one hour of taking IP. Her symptoms relieved after two hours. She did not take any medication	Gastrointestinal Disorders	Stomach Pain	2016-05-13	2016-05-13	None	Possible	Moderate	None	No	Recovered
	Adverse Events-1-024-16-PHX-0001	024	Participant experienced a sore throat for one day, no other symptoms were reported. Participant used Zinc lozenges to relieve sore throat	Respiratory, Thoracic and Mediastinal Disorders	Sore Throat	2016-04-15 07:00:00	2016-04-15 23:00:00	Medication	Unlikely	Mild	None	No	Recovered
	Adverse Events-1-025-16-PHX-0001	025	Subject experienced flu symptoms. Subject took Advil 400mg every 6 hrs for three days (from Apr 13-15, 2016). Subject didn't IP during illness	General Disorders	Flu Like Symptoms	2016-04-12	2016-04-17	Medication	Unrelated	Moderate	None	No	Recovered
	Adverse Events-1-026-16-PHX-0001	026	On IP, participant experienced severe diarrhea and vomiting for 3 days. No medications were required and no other symptoms reported.	Gastrointestinal Disorders	Vomiting	2016-06-01 08:00:00	2016-06-04 07:00:00	None	Unlikely	Severe	None	No	Recovered
	Adverse Events-1-046-16-PHX-0001	046	subject experienced palpitation from Day 01 of taking IP, that gets worse at night and disturb their sleep. no chest pain.	Cardiac Disorders	Cardiac Disorders - Other	2016-04-16			Unlikely	Moderate	None	No	AE Still Present
	Adverse Events-1-048-16-PHX-0001	048	Subject experienced knee pain	Musculoskeletal and Connective Tissue Disorders	Bone Pain	2016-05-20	2016-06-09	None	Unrelated	Mild	None	No	Recovered
	Adverse Events-1-051-16-PHX-0001	051	Blood in the stool. Diagnosed gastritis. Started antibiotic. Subject physician advised to stop the study. Anal fissure confirmed by colonoscopy. Test article discontinued on Apr 26, 2016.	Gastrointestinal Disorders	Gastritis	2016-04-23 08:00:00	2016-04-26 20:00:00	Medication	Unrelated	Moderate	Discontinued Permanently	No	Recovered
	Adverse Events-1-052-16-PHX-0001	052	Participant expereinced intermitten discoloured stools from April 11,2016 till date. Color change from light brown, dark brown and green. Participant explained this is normal due to her diet and unrelated to product.	Gastrointestinal Disorders	Gastrointestinal Disorders - Other	2016-04-11	2016-05-15	None	Unrelated	Mild	None	No	Recovered
	Adverse Events-1-060-16-PHX-0001	060	on IP, participant reported constant diarrhea with no other symptoms. No fever, no blood in stool. BM up to 7 a day. On May 4 2016, 3 a day. Started taking Loperamide.	Gastrointestinal Disorders	Diarrhea	2016-04-16 12:00:00	2016-04-20 12:00:00	Medication	Possible	Mild	Discontinued Permanently	No	Recovered
	Adverse Events-1-072-16-PHX-0001	072	Subject expereinced headaches and stuffy nose	Nervous System Disorders	Headache	2016-05-08 12:00:00	2016-05-09 12:00:00	Other	Unlikely	Mild	None	No	Recovered
	Adverse Events-2-001-16-PHX-0001	001	Subject experienced constipation symptoms (straining to start defecation, bloating, feeling of discomfort with defecation).	Gastrointestinal Disorders	Constipation	2016-04-11	2016-04-23	None	Unlikely	Mild	None	No	Recovered
	Adverse Events-2-005-16-PHX-0001	005	Subject experienced different stool color (dark green) without unusual odor.	Gastrointestinal Disorders	Gastrointestinal Disorders - Other	2016-04-07	2016-04-20	None	Unlikely	Mild	None	No	Recovered
	Adverse Events-2-007-16-PHX-0001	007	subject experienced frequent stool elimination on May 2, 2016. subject has hemorrhoid history but no rectal bleeding. Subject used a proctofoam topical cream	Gastrointestinal Disorders	Hemorrhoids	2016-05-02 10:32:00	2016-05-02 13:17:00	Medication	Possible	Mild	None	No	Recovered
	Adverse Events-2-013-16-PHX-0001	013	on IP, subject experienced numbness on the right arm and right side of neck and face. There was a tight feeling on chest, no pain. It's associated with dizziness. Test article discontinued on May 15, 2016	Nervous System Disorders	Dizziness	2016-05-13	2016-05-15	None	Unlikely	Severe	Discontinued Permanently	No	Recovered
	Adverse Events-2-051-16-PHX-0001	051	Stool discoloration. Purple stool reported.	Gastrointestinal Disorders	Gastrointestinal Disorders - Other	2016-04-12 14:05:00	2016-04-15 20:00:00	None	Possible	Mild	None	No	Recovered
	Adverse Events-2-052-16-PHX-0001	052	Participant experienced Heartburn for one day and took Antacid 400 mg. Symptoms were relieved.	Gastrointestinal Disorders	Gastrointestinal Disorders - Other	2016-06-08	2016-06-08	Medication	Unlikely	Moderate	None	No	Recovered
	Adverse Events-3-001-16-PHX-0001	001	Subject experienced though day at work on Apr 23, 2016. She complained from a little stress and stomachache.	Gastrointestinal Disorders	Stomach Pain	2016-04-23	2016-04-23	None	Unrelated	Mild	None	No	Recovered
	Adverse Events-3-007-16-PHX-0001	007	subject experienced joint inflamation in knee area, bilateral without redness. She took Curcumin supplements for two days and her symptoms relieved.	Musculoskeletal and Connective Tissue Disorders	Joint Range of Motion Decreased	2016-06-01	2016-06-03	Medication	Unlikely	Mild	None	No	Recovered
	Adverse Events-3-013-16-PHX-0001	013	Nausea - associated with vomitting	Gastrointestinal Disorders	Nausea	2016-05-13	2016-06-01	None	Possible	Severe	Discontinued Permanently	No	Recovered
	Adverse Events-4-001-16-PHX-0001	001	Participant reported a change in stool color, purple coloration appeared	Gastrointestinal Disorders	Gastrointestinal Disorders - Other	2016-05-05 18:45:00	2016-05-31 18:30:00	None	Probable	Mild	None	No	Recovered
	Adverse Events-4-007-16-PHX-0001	007	subject experienced sore throat and congestion for twon days. She did not take medication just used Echinacea	Respiratory, Thoracic and Mediastinal Disorders	Sore Throat	2016-05-22	2016-05-24	None	Unrelated	Mild	None	No	Recovered
	Adverse Events-5-001-16-PHX-0001	001	Participant reported discoloration of the teeth, requiring extra brushing	General Disorders	General Disorders - Other	2016-05-11 07:00:00	2016-05-30 07:00:00	None	Probable	Mild	None	No	Recovered
